# Supplementary material for: Stepwise and selective synthesis of chelating, multimetallic and mixed-metal π-diborene complexes
Source: Royal Society of Chemistry journal article supplement (doi:10.1039/d3cc05477b), 2023-12-18
Supplement: d3cc05477b1.pdf [file d3cc05477b1.pdf]

Electronic Supporting Information for

## Stepwise and selective synthesis of chelating, multimetallic and mixed-metal $\pi$ -diborene complexes

Dario Duwe,<sup>[a],[b]</sup> Koushik Saha,<sup>[a],[b]</sup> Lukas Endres,<sup>[a],[b]</sup> Tobias Brückner,<sup>[a],[b]</sup> Rian D. Dewhurst,<sup>[a],[b]</sup> Maximilian Dietz,<sup>[a],[b]</sup> Krzysztof Radacki,<sup>[a],[b]</sup> Felipe Fantuzzi,<sup>[c]</sup> and Holger Braunschweig\*<sup>[a],[b]</sup>

- 
- [a] Dario Duwe, Dr. Koushik Saha, Lukas Endres, Dr. Tobias Brückner, Dr. Rian D. Dewhurst, Dr. Maximilian Dietz, Dr. Krzysztof Radacki, Prof. Dr. Holger Braunschweig  
Institute for Inorganic Chemistry,  
Julius-Maximilians-Universität Würzburg  
Am Hubland, 97074, Würzburg, Germany
- [b] Dario Duwe, Dr. Koushik Saha, Lukas Endres, Dr. Tobias Brückner, Dr. Rian D. Dewhurst, Dr. Maximilian Dietz, Dr. Krzysztof Radacki, Prof. Dr. Holger Braunschweig  
Institute for Sustainable Chemistry & Catalysis with Boron  
Julius-Maximilians-Universität Würzburg  
Am Hubland, 97074, Würzburg, Germany
- [c] Dr. Felipe Fantuzzi  
School of Chemistry and Forensic Science  
University of Kent  
Canterbury, Park Wood Rd, CT2 7NH, United Kingdom.

### Contents

|                                         |    |
|-----------------------------------------|----|
| Methods and materials .....             | 2  |
| Synthetic procedures .....              | 3  |
| NMR spectra of isolated compounds ..... | 10 |
| UV-vis spectra.....                     | 36 |
| X-ray crystallographic data .....       | 40 |
| Computational details.....              | 44 |
| References .....                        | 64 |

## **Methods and materials**

All manipulations were performed either under an atmosphere of dry argon or *in vacuo* using standard Schlenk line or glovebox techniques. Deuterated solvents were dried over molecular sieves and degassed by three freeze-pump-thaw cycles prior to use. All other solvents were distilled and degassed from appropriate drying agents. Both deuterated and non-deuterated solvents were stored under argon over activated 4 Å molecular sieves. Liquid-phase NMR spectra were acquired on a Bruker Avance 500 ( $^1\text{H}$ : 500.1 MHz,  $^{11}\text{B}$ : 160.5 MHz,  $^{13}\text{C}$ : 125.8 MHz,  $^{19}\text{F}$ : 470.6 MHz,  $^{31}\text{P}$ : 202.5 MHz) or Bruker Avance 600 ( $^1\text{H}$ : 600.2 MHz,  $^{11}\text{B}$ : 192.7 MHz,  $^{13}\text{C}$ : 150.9 MHz) spectrometer. Chemical shifts ( $\delta$ ) are reported in ppm and internally referenced to the carbon nuclei ( $^{13}\text{C}\{^1\text{H}\}$ ) ( $\text{C}_6\text{D}_6$ : 128.1,  $\text{C}_6\text{D}_5\text{Br}$ : 122.6) or residual protons ( $^1\text{H}$ ) ( $\text{C}_6\text{D}_6$ : 7.16,  $\text{C}_6\text{D}_5\text{Br}$ : 7.30) of the solvent. Heteronuclei NMR spectra are referenced to external standards ( $^{11}\text{B}$ :  $\text{BF}_3\cdot\text{OEt}_2$ ,  $^{19}\text{F}$ :  $\text{CFCl}_3$ ,  $^{31}\text{P}$ : 85% aq.  $\text{H}_3\text{PO}_4$ ). Resonances are given as singlet (s), doublet (d), triplet (t), septet (sept), multiplet (m) or broad (br). High-resolution mass spectrometry (HRMS) data were obtained from a Thermo Scientific Exactive Plus spectrometer. UV-vis spectra were acquired on a METTLER TOLEDO UV-vis-Excellence UV5 spectrophotometer.

Solvents and reagents were purchased from Sigma-Aldrich, ABCR or Alfa Aesar.  $\text{B}_2(\text{SIDep})_2$ ,<sup>1</sup>  $[(\text{SIDep})\text{HB}=\text{B}(2\text{-C}_3\text{H}_4\text{N})(\text{SIDep})]$  (**1**),<sup>2</sup>  $[\text{Cu}(\text{C}_6\text{F}_5)]_4$ ,<sup>3</sup>  $[\text{AgCl}(\text{PPh}_3)]^4$  and  $[\text{AuCl}(\text{PPh}_3)]^5$  were prepared according to literature procedures.

## Synthetic procedures

### Synthesis of [(SIDep)HB=B(2-C<sub>5</sub>H<sub>4</sub>N)(SIDep)][CuCl] (2-CuCl)

**1** (20.0 mg, 26  $\mu$ mol, 1.00 equiv.) and [CuCl(SMe<sub>2</sub>)] (2.6 mg, 26  $\mu$ mol, 1.00 equiv.) were combined in benzene (0.6 mL) and stirred at room temperature for 30 minutes. The volatiles were removed *in vacuo* and the residue was washed with *n*-hexane (1 mL). After drying under reduced pressure, the residue was extracted with benzene and by slow diffusion of *n*-pentane into the solution the product crystallized as orange blocks (10.6 mg, 12  $\mu$ mol, 46%), which were also suitable for X-ray diffractometry.

<sup>1</sup>H{<sup>11</sup>B} NMR (500.1 MHz, C<sub>6</sub>D<sub>6</sub>):  $\delta$  = 8.36 – 8.34 (m, 1H, H<sup>Pyr</sup>), 7.28 – 7.22 (m, 4H, H<sup>Ar</sup>), 7.08 – 7.05 (m, 2H, H<sup>Ar</sup>), 7.01 – 7.00 (m, 2H, H<sup>Ar</sup>), 6.88 – 6.84 (m, 4H, H<sup>Ar</sup>), 6.31 – 6.25 (m, 2H, H<sup>Pyr</sup>), 4.90 – 4.88 (m, 1H, H<sup>Pyr</sup>), 3.33 – 3.19 (m, 4H, CH<sub>2</sub><sup>Et</sup> + NCH<sub>2</sub>), 3.15 – 3.11 (m, 2H, NCH<sub>2</sub>), 3.05 – 3.00 (m, 2H, NCH<sub>2</sub>), 2.98 – 2.84 (m, 6H, CH<sub>2</sub><sup>Et</sup> + NCH<sub>2</sub>), 2.70 – 2.53 (m, 7H, CH<sub>2</sub><sup>Et</sup> + NCH<sub>2</sub> + BH), 2.19 (dq, <sup>2</sup>J<sub>HH</sub> = 15.6 Hz, <sup>3</sup>J<sub>HH</sub> = 7.8 Hz, 2H, CH<sub>2</sub><sup>Et</sup>), 1.75 (dq, <sup>2</sup>J<sub>HH</sub> = 15.4 Hz, <sup>3</sup>J<sub>HH</sub> = 7.7 Hz, 2H, CH<sub>2</sub><sup>Et</sup>), 1.34 – 1.32 (two overlapping t, <sup>3</sup>J<sub>HH</sub> = 7.7, 7.5 Hz, 12H, CH<sub>3</sub><sup>Et</sup>), 1.26 (t, <sup>3</sup>J<sub>HH</sub> = 7.6 Hz, 6H, CH<sub>3</sub><sup>Et</sup>), 0.99 (t, <sup>3</sup>J<sub>HH</sub> = 7.8 Hz, 6H, CH<sub>3</sub><sup>Et</sup>) ppm.

<sup>13</sup>C{<sup>1</sup>H} NMR (150.9 MHz, C<sub>6</sub>D<sub>6</sub>):  $\delta$  = <sup>13</sup>C{<sup>1</sup>H} NMR (125.8 MHz, C<sub>6</sub>D<sub>6</sub>):  $\delta$  = 191.8 (C<sup>Carbene</sup>), 185.7 (C<sup>Carbene</sup>), 176.1 (C<sup>2-Pyr</sup>), 145.5 (C<sup>Pyr</sup>), 142.2 (C<sup>q</sup>), 141.7 (C<sup>q</sup>), 141.5 (C<sup>q</sup>), 140.8 (C<sup>q</sup>), 138.7 (C<sup>q</sup>), 137.2 (C<sup>q</sup>), 131.5 (C<sup>Pyr</sup>), 128.3 (C<sup>Pyr</sup>), 126.9 (C<sup>Ar</sup>), 125.9 (C<sup>Ar</sup>), 125.7 (C<sup>Ar</sup>), 125.4 (C<sup>Ar</sup>), 116.0 (C<sup>Pyr</sup>), 50.8 (NCH<sub>2</sub>), 50.6 (NCH<sub>2</sub>), 24.5 (CH<sub>2</sub><sup>Et</sup>), 24.3 (CH<sub>2</sub><sup>Et</sup>), 23.9 (CH<sub>2</sub><sup>Et</sup>), 23.2 (CH<sub>2</sub><sup>Et</sup>), 14.1 (CH<sub>3</sub><sup>Et</sup>), 13.7 (CH<sub>3</sub><sup>Et</sup>), 13.5 (CH<sub>3</sub><sup>Et</sup>) ppm.

<sup>11</sup>B{<sup>1</sup>H} NMR (160.5 MHz, C<sub>6</sub>D<sub>6</sub>):  $\delta$  = 23.9 (NCB), 5.1 (BH) ppm.

HRMS(LIFDI): m/z (C<sub>51</sub>H<sub>65</sub>B<sub>2</sub>N<sub>5</sub>CuCl) = calc.: 867.4405, found: 867.4389.

UV-vis (C<sub>6</sub>H<sub>6</sub>):  $\lambda_{max}$  = 437 nm.

### Synthesis of [(SIDep)HB=B(2-C<sub>5</sub>H<sub>4</sub>N)(SIDep)][CuCl]<sub>2</sub> (3-CuCl)

**Route a: 2-Cu** (20.0 mg, 23  $\mu$ mol, 1.00 equiv.) and [CuCl(SMe<sub>2</sub>)] (3.7 mg, 23  $\mu$ mol, 1.00 equiv.) were combined in benzene (0.6 mL) and stirred at room temperature for 30 minutes. The volatiles were removed *in vacuo* and the residue was washed with *n*-hexane (1 mL). After drying under reduced pressure, the residue was extracted with benzene and by slow diffusion of *n*-pentane into the solution the product crystallized as red blocks (11.7 mg, 12  $\mu$ mol, 46%).

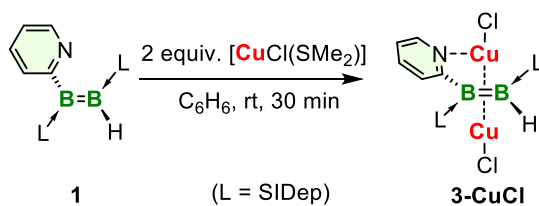

**Scheme S1** Alternative synthetic route for **3-CuCl**.

**Route b:** **1** (20.0 mg, 26  $\mu\text{mol}$ , 1.00 equiv) and  $[\text{CuCl}(\text{SMe}_2)]$  (5.2 mg, 52  $\mu\text{mol}$ , 2.00 equiv) were combined in benzene (0.6 mL) and stirred at room temperature for 30 minutes. The volatiles were removed *in vacuo* and the residue was washed with *n*-hexane (1 mL). After drying under reduced pressure, the residue was extracted with benzene and by slow diffusion of *n*-pentane into the solution the product crystallized as red blocks (11.3 mg, 12  $\mu\text{mol}$ , 46%), which were also suitable for X-ray diffractometry.

$^1\text{H}\{^{11}\text{B}\}$  NMR (500.1 MHz,  $\text{C}_6\text{D}_6$ ):  $\delta$  = 8.01 (m, 1H,  $H^{\text{Pyr}}$ ), 6.96 – 6.90 (m, 4H,  $H^{\text{Ar}}$ ), 6.83 (d,  $^3J_{\text{HH}} = 7.5$  Hz, 4H,  $H^{\text{Ar}}$ ), 6.73 (d,  $^3J_{\text{HH}} = 7.5$  Hz, 4H,  $H^{\text{Ar}}$ ), 6.00 – 5.98 (m, 1H,  $H^{\text{Pyr}}$ ), 5.96 – 5.92 (m, 1H,  $H^{\text{Pyr}}$ ), 5.50 – 5.49 (m, 1H,  $H^{\text{Pyr}}$ ), 3.22 (dq,  $^2J_{\text{HH}} = 15.4$  Hz,  $^3J_{\text{HH}} = 7.7$  Hz, 4H,  $\text{CH}_2^{\text{Et}}$ ), 3.12 – 3.06 (m, 4H,  $\text{CH}_2^{\text{Et}}$ ), 2.99 (s, 4H,  $\text{NCH}_2$ ), 2.92 (s, 4H,  $\text{NCH}_2$ ), 2.69 – 2.59 (m, 8H,  $\text{CH}_2^{\text{Et}}$ ), 1.34 (t,  $^3J_{\text{HH}} = 7.5$  Hz, 12H,  $\text{CH}_3^{\text{Et}}$ ), 1.24 (t,  $^3J_{\text{HH}} = 7.7$  Hz, 12H,  $\text{CH}_3^{\text{Et}}$ ) ppm. (Note: The BH resonance could not be detected due to broadening.)

$^{13}\text{C}\{^1\text{H}\}$  NMR (150.9 MHz,  $\text{C}_6\text{D}_6$ ):  $\delta$  = 185.0 ( $C^{\text{Carbene}}$ , identified by HMBC), 184.8 ( $C^{\text{Carbene}}$ , identified by HMBC), 173.4 ( $C^{2\text{-Pyr}}$ , identified by HMBC), 144.3 ( $\text{CH}^{\text{Pyr}}$ ), 141.1 ( $C^{\text{q}}$ ), 140.4 ( $C^{\text{q}}$ ), 137.9 ( $C^{\text{q}}$ ), 137.6 ( $C^{\text{q}}$ ), 132.6 ( $C^{\text{Ar}}$ ), 128.2 ( $C^{\text{Ar}}$ ), 128.2 ( $C^{\text{Ar}}$ ), 126.4 ( $C^{\text{Ar}}$ ), 126.0 ( $C^{\text{Ar}}$ ), 117.0 ( $C^{\text{Pyr}}$ ), 51.9 ( $\text{NCH}_2$ ), 51.1 ( $\text{NCH}_2$ ), 25.1 ( $\text{CH}_2^{\text{Et}}$ ), 24.8 ( $\text{CH}_2^{\text{Et}}$ ), 14.0 ( $\text{CH}_3^{\text{Et}}$ ), 13.6 ( $\text{CH}_3^{\text{Et}}$ ) ppm.

$^{11}\text{B}\{^1\text{H}\}$  NMR (192.7 MHz,  $\text{C}_6\text{D}_6$ ):  $\delta$  = 10.2 (NCB), 0.0 (BH) ppm.

**HRMS(LIFDI): m/z:** calc.: 965.3359 ( $\text{C}_{51}\text{H}_{65}\text{B}_2\text{N}_5\text{Cu}_2\text{Cl}_2$ ), 932.3683 ( $\text{C}_{51}\text{H}_{65}\text{B}_2\text{N}_5\text{Cu}_2\text{Cl}$ ), found: 932.3661.

**UV-vis ( $\text{C}_6\text{H}_6$ ):**  $\lambda_{\text{max}} = 355$  nm (shoulder), 476 nm.

## Synthesis of [(SIDep)HB=B(2-C<sub>5</sub>H<sub>4</sub>N)(SIDep)][(CuC<sub>6</sub>F<sub>5</sub>)<sub>2</sub>] (3-CuC<sub>6</sub>F<sub>5</sub>)

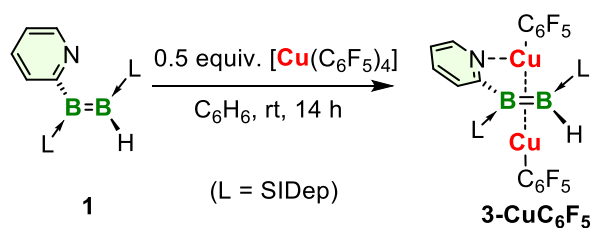

**Scheme S2** Synthesis of **3-CuCl**.

**1** (20.0 mg, 26  $\mu\text{mol}$ , 1.00 equiv) and  $[\text{Cu}(\text{C}_6\text{F}_5)_4]$  (12.0 mg, 13  $\mu\text{mol}$ , 0.50 equiv) were dissolved in benzene (0.6 mL) and stirred at room temperature for 14 hours. The volatiles were removed *in vacuo* and the residue was washed with *n*-hexane (3 x 0.5 mL). The solid was dried *in vacuo* and after crystallization from toluene the product was obtained as red crystals (11.0 mg, 9  $\mu\text{mol}$ , 35%). Crystals suitable for x-ray diffractometry were obtained by slow evaporation of a saturated *n*-hexane solution.

$^1\text{H}\{^{11}\text{B}\}$  NMR (500.1 MHz,  $\text{C}_6\text{D}_6$ ):  $\delta$  = 7.55 (m, 1H,  $\text{CH}^{\text{Pyr}}$ ), 6.93 (t, 2H,  $^3J_{\text{HH}} = 7.6$  Hz,  $\text{CH}^{4\text{-Ar}}$ ), 6.88 (t, 2H,  $^3J_{\text{HH}} = 7.6$  Hz,  $\text{CH}^{4\text{-Ar}}$ ), 6.73 (d, 4H,  $^3J_{\text{HH}} = 7.6$  Hz,  $\text{CH}^{3\text{-Ar}}$ ), 6.64 (d, 4H,  $^3J_{\text{HH}} = 7.6$  Hz,  $\text{CH}^{3\text{-Ar}}$ ), 6.48 – 6.46 (m, 1H,  $\text{CH}^{\text{Pyr}}$ ), 6.19 – 6.16 (m, 1H,  $\text{CH}^{\text{Pyr}}$ ), 5.92 – 5.90 (m, 1H,  $\text{CH}^{\text{Pyr}}$ ), 2.94 (s, 4H,  $\text{NCH}_2$ ), 2.93 (s, 4H,  $\text{NCH}_2$ ), 2.66 – 2.38 (m, 16H,  $\text{CH}_2^{\text{Et}}$ ), 1.04 – 1.00 (m, 24H,  $\text{CH}_3^{\text{Et}}$ ) ppm. (Note: The BH resonance could not be detected due to broadening.)

$^{13}\text{C}\{^1\text{H}\}$  NMR (125.8 MHz,  $\text{C}_6\text{D}_6$ ):  $\delta$  = 204.1 ( $\text{C}^{\text{Carbene}}$ , identified by HMBC), 185.8 ( $\text{C}^{\text{Carbene}}$ , identified by HMBC), 173.9 ( $\text{C}^{\text{q-Pyr}}$ , identified by HMBC), 150.0 (br,  $\text{C}_6\text{F}_5$ ), 149.7 (br,  $\text{C}_6\text{F}_5$ ), 148.2 (br,  $\text{C}_6\text{F}_5$ ), 144.7 ( $\text{C}^{\text{Pyr}}$ ), 141.8 ( $\text{C}^{2\text{-Pyr}}$ ), 140.5 ( $\text{C}^{\text{Ortho-Ar}}$ ), 140.0 ( $\text{C}^{\text{Ortho-Ar}}$ ), 138.7 ( $\text{C-N}$ ), 137.7 ( $\text{C-N}$ ), 132.9 ( $\text{C}^{\text{Pyr}}$ ), 128.2 ( $\text{C}^{\text{Para-Ar}}$ ), 127.9 ( $\text{C}^{\text{Para-Ar}}$ ), 126.1 ( $\text{C}^{\text{Meta-Ar}}$ ), 125.9 ( $\text{C}^{\text{Meta-Ar}}$ ), 52.2 ( $\text{NCH}_2$ ), 51.2 ( $\text{NCH}_2$ ), 24.6 ( $\text{CH}_2^{\text{Et}}$ ), 24.5 ( $\text{CH}_2^{\text{Et}}$ ), 13.1 ( $\text{CH}_3^{\text{Et}}$ ) ppm. (Note: Some signals are overlapped by the  $\text{C}_6\text{D}_6$  signal.)

$^{11}\text{B}\{^1\text{H}\}$  NMR (160.5 MHz,  $\text{C}_6\text{D}_6$ ):  $\delta$  = 13.9 (NCB), 6.5 (BH) ppm.

$^{19}\text{F}$  NMR (470.6 MHz,  $\text{C}_6\text{D}_6$ ):  $\delta$  = -110.3 (m, 4F,  $\text{CF}^{\text{Ar}}$ ), -161.3 (m, 2F,  $\text{CF}^{\text{Ar-Para}}$ ), -162.7 (m, 4F,  $\text{CF}^{\text{Ar}}$ ) ppm.

HRMS(LIFDI):  $m/z$  ( $\text{C}_{63}\text{H}_{65}\text{B}_2\text{N}_5\text{Cu}_2\text{F}_{10}$ ) = calc.: 1229.3853, found: 1229.3845.

UV/Vis ( $\text{C}_6\text{H}_6$ ):  $\lambda_{\text{max}} = 379, 400 - 600$  (br) nm.

## Synthesis of [(SIDep)HB=B(2-C<sub>5</sub>H<sub>4</sub>N)(SIDep)][CuCl]<sub>4</sub> (4-Cu)

**Route a:** **3-CuCl** (15.0 mg, 15.5  $\mu\text{mol}$ , 1.00 equiv) and  $[\text{CuCl}(\text{SMe}_2)]$  (7.5 mg, 46.5  $\mu\text{mol}$ , 3.00 equiv) were combined in benzene (0.6 mL) and stirred at room temperature for 14 h. The excess  $[\text{CuCl}(\text{SMe}_2)]$  was removed by filtration of the suspension and after drying *in vacuo* the product was obtained as a yellow solid (10.2 mg, 8.7  $\mu\text{mol}$ , 56%).

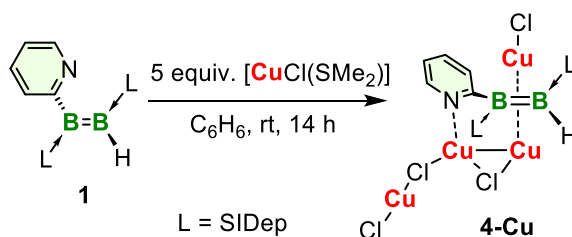

**Scheme S3** Alternative synthetic route for **4-Cu**.

**Route b:** **1** (10.0 mg, 13.0  $\mu\text{mol}$ , 1.00 equiv) and  $[\text{CuCl}(\text{SMe}_2)]$  (10.5 mg, 65.0  $\mu\text{mol}$ , 5.00 equiv) were dissolved in benzene (0.6 mL) and stirred at room temperature for 14 h. The excess  $[\text{CuCl}(\text{SMe}_2)]$  was removed by filtration of the suspension and after drying *in vacuo* the product was obtained as a yellow solid (8.5 mg, 7.3  $\mu\text{mol}$ , 56%).

$^1\text{H}\{^{11}\text{B}\}$  NMR (500.1 MHz,  $\text{C}_6\text{D}_6$ ):  $\delta$  = 8.62 – 8.61 (m, 1H,  $\text{CH}^{\text{Ar},2\text{-pyr}}$ ), 6.98 – 6.91 (m, 2H,  $\text{CH}^{\text{Ar}}$ ), 6.87 – 6.85 (m, 2H,  $\text{CH}^{\text{Ar}}$ ), 6.79 – 6.77 (m, 4H,  $\text{CH}^{\text{Ar}}$ ), 6.64 (br. s, 4H,  $\text{CH}^{\text{Ar}}$ ), 6.21 – 6.20 (m, 1H,  $\text{CH}^{\text{Ar},4\text{-pyr}}$ ), 6.13 – 6.10 (m, 1H,  $\text{CH}^{\text{Ar},3\text{-pyr}}$ ), 5.90 – 5.88 (m, 1H,  $\text{CH}^{\text{Ar},5\text{-pyr}}$ ), 3.20 (br. s, 1H, BH), 3.08 (br. s, 4H,  $\text{NCH}_2$ ), 2.94 (br. s, 4H,  $\text{CH}_2^{\text{Et}}$ ), 2.90 (br. s, 4H,  $\text{NCH}_2$ ), 2.82 (br. s, 4H,  $\text{CH}_2^{\text{Et}}$ ), 2.63 (br. s, 4H,  $\text{CH}_2^{\text{Et}}$ ), 2.46 – 2.38 (m, 4H,  $\text{CH}_2^{\text{Et}}$ ), 1.28 – 1.26 (m, 24H,  $\text{CH}_3^{\text{Et}}$ ) ppm.

$^{13}\text{C}\{^1\text{H}\}$  NMR (125.8 MHz,  $\text{C}_6\text{D}_6$ ):  $\delta$  = 203.7 ( $\text{C}^{\text{Carbene}}$ ), 182.9 ( $\text{C}^{\text{Carbene}}$ ), 170.8 (BC=N), 148.7 ( $\text{CH}^{\text{Ar},2\text{-pyr}}$ ), 141.6 ( $\text{C}^{\text{q}}$ ), 140.2 ( $\text{C}^{\text{q}}$ ), 137.0 ( $\text{C}^{\text{q}}$ ), 136.6 ( $\text{C}^{\text{q}}$ ), 132.6 ( $\text{CH}^{\text{Ar},4\text{-pyr}}$ ), 132.4 ( $\text{CH}^{\text{Ar},3\text{-pyr}}$ ), 129.2 ( $\text{C}^{\text{Ar}}$ ), 129.2 ( $\text{C}^{\text{Ar}}$ ), 128.8 ( $\text{C}^{\text{Ar}}$ ), 126.4 ( $\text{C}^{\text{Ar}}$ ), 120.3 ( $\text{CH}^{\text{Ar},5\text{-pyr}}$ ), 52.2 ( $\text{NCH}_2$ ), 51.4 ( $\text{NCH}_2$ ), 24.6 ( $\text{CH}_2^{\text{Et}}$ ), 24.3 ( $\text{CH}_2^{\text{Et}}$ ), 14.4 ( $\text{CH}_3^{\text{Et}}$ ), 13.5 ( $\text{CH}_3^{\text{Et}}$ ) ppm. (Note: Some signals are overlapped by the  $\text{C}_6\text{D}_6$  signal.)

$^{11}\text{B}\{^1\text{H}\}$  NMR (160.5 MHz,  $\text{C}_6\text{D}_6$ ):  $\delta$  = 16.5 (NCB), 0.3 (BH) ppm.

**HRMS(LIFDI):** m/z: calc.: 1165.1317 ( $\text{C}_{51}\text{H}_{65}\text{B}_2\text{N}_5\text{Cu}_4\text{Cl}_4$ ), 1130.1623 ( $\text{C}_{51}\text{H}_{65}\text{B}_2\text{N}_5\text{Cu}_4\text{Cl}_3$ ), 1030.2668 ( $\text{C}_{51}\text{H}_{65}\text{B}_2\text{N}_5\text{Cu}_3\text{Cl}_2$ ), 932.3683 ( $\text{C}_{51}\text{H}_{65}\text{B}_2\text{N}_5\text{Cu}_2\text{Cl}$ ), found: 1130.1592, 1030.2629, 932.3644.

**UV/Vis** ( $\text{C}_6\text{H}_6$ ):  $\lambda_{\text{max}}$  = 367, 400 – 600 (br) nm.

### Synthesis of $[(\text{SIDep})\text{HB}=\text{B}(2\text{-C}_5\text{H}_4\text{N})(\text{SIDep})][\text{AgCl}]$ (**2-AgCl**)

**1** (15.0 mg, 22  $\mu\text{mol}$ , 1.00 equiv) and  $[\text{AgCl}(\text{PPh}_3)]$  (8.1 mg, 22  $\mu\text{mol}$ , 1.00 equiv) were dissolved in  $\text{C}_6\text{D}_6$  (0.6 mL) and stirred at room temperature overnight. The volatiles were removed *in vacuo* and the residue was washed with *n*-hexane (3 x 0.5 mL). The solid was dried *in vacuo* and after crystallization from toluene the product was obtained as yellow crystals (10.7 mg, 12  $\mu\text{mol}$ , 54%), which were also suitable for X-ray diffractometry.

$^1\text{H}\{^{11}\text{B}\}$  NMR (500.1 MHz,  $\text{C}_6\text{D}_6$ ):  $\delta$  = 8.34 – 8.33 (m, 1H,  $H^{\text{Pyr}}$ ), 7.27 – 7.21 (m, 4H,  $H^{\text{Ar}}$ ), 7.08 (t,  $^3J_{\text{HH}} = 7.6$  Hz,  $H^{\text{Ar}}$ ), 7.00 – 6.99 (m, 2H,  $H^{\text{Ar}}$ ), 6.91 – 6.89 (m, 2H,  $H^{\text{Ar}}$ ), 6.83 – 6.81 (m, 2H,  $H^{\text{Ar}}$ ), 6.31

– 6.28 (m, 1H,  $H^{\text{Pyr}}$ ), 6.24 – 6.21 (m, 1H,  $H^{\text{Pyr}}$ ), 5.02 – 5.00 (m, 1H,  $H^{\text{Pyr}}$ ), 3.26 (dq,  ${}^2J_{\text{HH}} = 15.0$  Hz,  ${}^3J_{\text{HH}} = 7.5$  Hz, 2H,  $\text{CH}_2^{\text{Et}}$ ), 3.19 – 3.01 (m, 6H,  $\text{NCH}_2$ ), 2.92 – 2.84 (m, 4H,  $\text{CH}_2^{\text{Et}} + \text{NCH}_2$ ), 2.77 (dq,  ${}^2J_{\text{HH}} = 15.2$  Hz,  ${}^3J_{\text{HH}} = 7.6$  Hz, 2H,  $\text{CH}_2^{\text{Et}}$ ), 2.63 (dq,  ${}^2J_{\text{HH}} = 15.2$  Hz,  ${}^3J_{\text{HH}} = 7.6$  Hz, 2H,  $\text{CH}_2^{\text{Et}}$ ), 2.55 – 2.44 (m, 4H,  $\text{CH}_2^{\text{Et}}$ ), 2.18 (dq,  ${}^2J_{\text{HH}} = 15.2$  Hz,  ${}^3J_{\text{HH}} = 7.6$  Hz, 2H,  $\text{CH}_2^{\text{Et}}$ ), 1.80 – 1.73 (m, 2H,  $\text{CH}_2^{\text{Et}}$ ), 1.36 – 1.31 (m, 12H,  $\text{CH}_3^{\text{Et}}$ ), 1.26 (t,  ${}^3J_{\text{HH}} = 7.6$  Hz, 6H,  $\text{CH}_3^{\text{Et}}$ ), 0.99 (t,  ${}^3J_{\text{HH}} = 7.6$  Hz, 6H,  $\text{CH}_3^{\text{Et}}$ ) ppm. (Note: The BH resonance could not be detected due to broadening.)

${}^{13}\text{C}\{^1\text{H}\}$  NMR (125.8 MHz,  $\text{C}_6\text{D}_6$ ):  $\delta = 191.2$  ( $\text{C}^{\text{Carbene}}$ ), 185.8 ( $\text{C}^{\text{Carbene}}$ , identified by HMBC), 174.4 ( $\text{C}^{\text{Pyr}}$ , identified by HMBC), 146.2 ( $\text{C}^{\text{Pyr}}$ ), 142.1 ( $\text{C}^{\text{q}}$ ), 141.7 ( $\text{C}^{\text{q}}$ ), 141.2 ( $\text{C}^{\text{q}}$ ), 140.7 ( $\text{C}^{\text{q}}$ ), 138.3 ( $\text{C}^{\text{q}}$ ), 137.0 ( $\text{C}^{\text{q}}$ ), 131.3 ( $\text{C}^{\text{Pyr}}$ ), 128.5 ( $\text{C}^{\text{Pyr}}$ ), 126.9 ( $\text{C}^{\text{Ar}}$ ), 126.0 ( $\text{C}^{\text{Ar}}$ ), 125.9 ( $\text{C}^{\text{Ar}}$ ), 125.6 ( $\text{C}^{\text{Ar}}$ ), 116.2 ( $\text{C}^{\text{Pyr}}$ ), 50.7 ( $\text{NCH}_2$ ), 50.5 ( $\text{NCH}_2$ ), 24.4 ( $\text{CH}_2^{\text{Et}}$ ), 24.2 ( $\text{CH}_2^{\text{Et}}$ ), 23.9 ( $\text{CH}_2^{\text{Et}}$ ), 23.2 ( $\text{CH}_2^{\text{Et}}$ ), 22.4 ( $\text{CH}_2^{\text{Et}}$ ), 14.1 ( $\text{CH}_3^{\text{Et}}$ ), 13.9 ( $\text{CH}_3^{\text{Et}}$ ), 13.7 ( $\text{CH}_3^{\text{Et}}$ ), 13.6 ( $\text{CH}_3^{\text{Et}}$ ) ppm. (Note: Some signals are overlapped by the  $\text{C}_6\text{D}_6$  signal.)

${}^{11}\text{B}\{^1\text{H}\}$  NMR (160.5 MHz,  $\text{C}_6\text{D}_6$ ):  $\delta$  [ppm] = 27.0 (NCB), 4.1 (BH).

HRMS(LIFDI):  $m/z$  ( $\text{C}_{51}\text{H}_{65}\text{B}_2\text{N}_5\text{AgCl}$ ) = calc.: 913.4157, found: 913.4145.

UV/Vis ( $\text{C}_6\text{H}_6$ ):  $\lambda_{\text{max}} = 427$  nm.

### Synthesis of [(SIDep)HB=B(2-C<sub>5</sub>H<sub>4</sub>N)(SIDep)][AuCl] (2-AuCl)

**Route a:** **1** (20.0 mg, 26  $\mu\text{mol}$ , 1.00 equiv) and  $[\text{AuCl}(\text{PPh}_3)]$  (12.9 mg, 26  $\mu\text{mol}$ , 1.00 equiv) were dissolved in  $\text{C}_6\text{D}_6$  (0.6 mL) and stirred at room temperature overnight. The volatiles were removed *in vacuo* and the residue was washed with *n*-hexane (3 x 0.5 mL). The solid was dried *in vacuo* and after crystallization from toluene the product was obtained as yellow crystals (13 mg, 13  $\mu\text{mol}$ , 50%), which were also suitable for X-ray diffractometry.

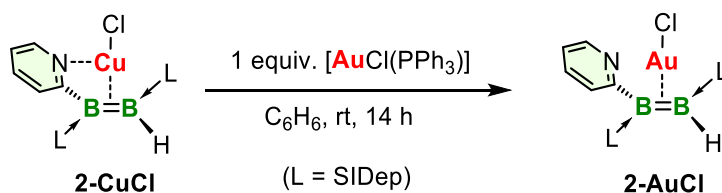

**Scheme S4** Alternative synthetic route for **2-AuCl**.

**Route b:** **2-CuCl** (20.0 mg, 23  $\mu\text{mol}$ , 1.00 equiv) and  $[\text{AuCl}(\text{PPh}_3)]$  (11.4 mg, 23  $\mu\text{mol}$ , 1.00 equiv) were combined in benzene (0.6 mL) and stirred at room temperature for 30 minutes. The suspension was filtered, and all volatiles were removed *in vacuo*. The residue was washed with *n*-hexane (3 x 0.5 mL) and extracted with benzene. By slow diffusion of *n*-pentane into the solution the product crystallized as yellow crystals (10.0 mg, 10  $\mu\text{mol}$ , 43%).

${}^1\text{H}\{^{11}\text{B}\}$  NMR (500.1 MHz,  $\text{C}_6\text{D}_6$ ):  $\delta = 8.25 - 8.23$  (m, 1H,  $H^{\text{Pyr}}$ ), 7.23 (t,  ${}^3J_{\text{HH}} = 7.6$  Hz, 2H,  $H^{\text{Ar}}$ ), 7.18 – 7.16 (m (obstructed by solvent signal), 1H,  $H^{\text{Ar}}$ ), 7.04 (t,  ${}^3J_{\text{HH}} = 7.6$  Hz, 2H,  $H^{\text{Ar}}$ ), 6.94 (d,

$^3J_{HH} = 7.4$  Hz, 2H,  $H^{Ar}$ ), 6.89 (d,  $^3J_{HH} = 7.2$  Hz, 2H,  $H^{Ar}$ ), 6.79 (d,  $^3J_{HH} = 7.2$  Hz, 2H,  $H^{Ar}$ ), 6.62 – 6.61 (m, 2H,  $H^{Pyr}$ ), 6.39 – 6.35 (m, 1H,  $H^{Pyr}$ ), 3.21 – 3.16 (m, 2H,  $NCH_2$ ), 3.14 – 3.06 (m, 2H,  $CH_2^{Et}$ ), 3.04 – 2.90 (m, 8H,  $CH_2^{Et} + NCH_2$ ), 2.77 (dq,  $^2J_{HH} = 15.2$  Hz,  $^3J_{HH} = 7.6$  Hz, 2H,  $CH_2^{Et}$ ), 2.64 (dq,  $^2J_{HH} = 15.0$  Hz,  $^3J_{HH} = 7.0$  Hz, 2H,  $CH_2^{Et}$ ), 2.51 – 2.31 (m, 6H,  $CH_2^{Et}$ ), 2.16 (dq,  $^2J_{HH} = 15.2$  Hz,  $^3J_{HH} = 7.6$  Hz, 2H,  $CH_2^{Et}$ ), 1.31 (t,  $^3J_{HH} = 7.5$  Hz, 6H,  $CH_3^{Et}$ ), 1.27 (t,  $^3J_{HH} = 7.6$  Hz, 6H,  $CH_3^{Et}$ ), 1.22 (t,  $^3J_{HH} = 7.6$  Hz, 6H,  $CH_3^{Et}$ ), 1.14 (t,  $^3J_{HH} = 7.5$  Hz, 6H,  $CH_3^{Et}$ ) ppm. (Note: The BH resonance could not be detected due to broadening.)

$^{13}C\{^1H\}$  NMR (125.8 MHz,  $C_6D_6$ ):  $\delta = 190.8$  ( $C^{Carbene}$ ), 187.8 ( $C^{Carbene}$ ), 176.1 ( $C^{q-Pyr}$ , identified by HMBC), 146.3 ( $C^{Pyr}$ ), 141.2 ( $C^q$ ), 141.2 ( $C^q$ ), 141.1 ( $C^q$ ), 140.5 ( $C^q$ ), 138.0 ( $C^q$ ), 137.2 ( $C^q$ ), 130.8 ( $C^{Pyr}$ ), 128.4 ( $C^{Pyr}$ ), 126.5 ( $C^{Ar}$ ), 126.1 ( $C^{Ar}$ ), 125.8 ( $C^{Ar}$ ), 125.5 ( $C^{Ar}$ ), 116.7 ( $C^{Pyr}$ ), 51.3 ( $NCH_2$ ), 50.9 ( $NCH_2$ ), 24.3 ( $CH_2^{Et}$ ), 23.9 ( $CH_2^{Et}$ ), 23.8 ( $CH_2^{Et}$ ), 23.6 ( $CH_2^{Et}$ ), 14.1 ( $CH_3^{Et}$ ), 14.0 ( $CH_3^{Et}$ ), 13.9 ( $CH_3^{Et}$ ), 13.5 ( $CH_3^{Et}$ ) ppm. (Note: Some signals are overlapped by the  $C_6D_6$  signal.)

$^{11}B\{^1H\}$  NMR (160.5 MHz,  $C_6D_6$ ):  $\delta = 15.0$  (NCB), 6.3 (BH) ppm.

HRMS(LIFDI): m/z ( $C_{51}H_{65}B_2N_5AuCl$ ) = calc.: 1001.4775, found: 1001.4749.

UV/Vis ( $C_6H_6$ ):  $\lambda_{max} = 400$  nm.

### Synthesis of [(SIDep)HB=B(2- $C_5H_4N$ )(SIDep)][AuBr] (2-AuBr)

**1** (20.0 mg, 26  $\mu$ mol, 1.00 equiv) and [AuBr(PCy<sub>3</sub>)] (14.5 mg, 26  $\mu$ mol, 1.00 equiv) were dissolved in  $C_6D_6$  (0.6 mL) and stirred at room temperature for three days. The volatiles were removed *in vacuo* and the residue was washed with *n*-hexane until the green color of the washing phases faded. The solid was dried *in vacuo* and after crystallization from a toluene/*n*-hexane mixture (1/4 v/v) at  $-30$  °C the product was obtained as yellow crystals (10 mg, 10  $\mu$ mol, 38%). Crystals suitable for X-ray diffractometry were obtained by slow evaporation of a saturated toluene solution.

$^1H\{^{11}B\}$  NMR (500.1 MHz,  $C_6D_6$ ):  $\delta = 8.24$  – 8.22 (m, 1H,  $H^{Pyr}$ ), 7.22 (t,  $^3J_{HH} = 7.7$  Hz, 2H,  $H^{Ar}$ ), 7.17 – 7.16 (m (overlapped by  $C_6D_6$  signal),  $H^{Ar}$ ), 7.04 (t,  $^3J_{HH} = 7.7$  Hz, 2H,  $H^{Ar}$ ), 6.93 (d,  $^3J_{HH} = 7.7$  Hz, 2H,  $H^{Ar}$ ), 6.90 (d,  $^3J_{HH} = 7.7$  Hz, 2H,  $H^{Ar}$ ), 6.80 (d,  $^3J_{HH} = 7.7$  Hz, 2H,  $H^{Ar}$ ), 6.62 – 6.60 (m, 2H,  $H^{Pyr}$ ), 6.39 – 6.35 (m, 1H,  $H^{Pyr}$ ), 3.19 – 3.12 (m, 4H,  $NCH_2 + CH_2^{Et}$ ), 3.06 – 2.89 (m, 8H,  $NCH_2 + CH_2^{Et}$ ), 2.77 (dq,  $^2J_{HH} = 15.0$  Hz,  $^3J_{HH} = 7.5$  Hz, 2H,  $CH_2^{Et}$ ), 2.64 (dq,  $^2J_{HH} = 15.0$  Hz,  $^3J_{HH} = 7.5$  Hz, 2H,  $CH_2^{Et}$ ), 2.49 – 2.40 (m, 4H,  $CH_2^{Et}$ ), 2.34 (dq,  $^2J_{HH} = 15.2$  Hz,  $^3J_{HH} = 7.6$  Hz, 2H,  $CH_2^{Et}$ ), 2.16 (dq,  $^2J_{HH} = 15.2$  Hz,  $^3J_{HH} = 7.6$  Hz, 2H,  $CH_2^{Et}$ ), 1.31 (t,  $^3J_{HH} = 7.5$  Hz, 6H,  $CH_3^{Et}$ ), 1.27 (t,  $^3J_{HH} = 7.5$  Hz, 6H,  $CH_3^{Et}$ ), 1.23 (t,  $^3J_{HH} = 7.6$  Hz, 6H,  $CH_3^{Et}$ ), 1.15 (t,  $^3J_{HH} = 7.6$  Hz, 6H,  $CH_3^{Et}$ ) ppm. (Note: The BH resonance could not be detected due to broadening.)

$^{13}C\{^1H\}$  NMR (125.8 MHz,  $C_6D_6$ ):  $\delta = 190.5$  ( $C^{Carbene}$ , identified by HMBC), 187.5 ( $C^{Carbene}$ , identified by HMBC), 175.9 ( $C^{q-Pyr}$ , identified by HMBC), 146.3 ( $C^{Pyr}$ ), 141.2 ( $C^q$ ), 141.1 ( $C^q$ ), 141.0 ( $C^q$ ), 140.5



(C<sup>q</sup>), 138.0 (C<sup>q</sup>), 137.3 (C<sup>q</sup>), 131.0 (C<sup>Py<sup>r</sup></sup>), 130.6 (C<sup>Py<sup>r</sup></sup>), 128.4 (C<sup>Ar</sup>), 128.2 (C<sup>Ar</sup>), 126.5 (C<sup>Ar</sup>), 126.1 (C<sup>Ar</sup>), 125.8 (C<sup>Ar</sup>), 125.5 (C<sup>Ar</sup>), 116.7 (C<sup>Py<sup>r</sup></sup>), 51.2 (NCH<sub>2</sub>), 50.9 (NCH<sub>2</sub>), 24.4 (CH<sub>2</sub><sup>Et</sup>), 23.9 (CH<sub>2</sub><sup>Et</sup>), 23.8 (CH<sub>2</sub><sup>Et</sup>), 23.7 (CH<sub>2</sub><sup>Et</sup>), 14.0 (CH<sub>3</sub><sup>Et</sup>), 13.9 (CH<sub>3</sub><sup>Et</sup>), 13.9 (CH<sub>3</sub><sup>Et</sup>), 13.4 (CH<sub>3</sub><sup>Et</sup>) ppm. (Note: Some signals are overlapped by the C<sub>6</sub>D<sub>6</sub> signal.)

<sup>11</sup>B{<sup>1</sup>H} NMR (160.5 MHz, C<sub>6</sub>D<sub>6</sub>): δ = 15.5 (NCB), 6.6 (BH) ppm.

HRMS(LIFDI): m/z (C<sub>51</sub>H<sub>65</sub>B<sub>2</sub>N<sub>5</sub>AuBr) = calc.: 1046.4303, found: 1046.4269.

UV/Vis (C<sub>6</sub>H<sub>6</sub>): λ<sub>max</sub> = 401 nm.

### Synthesis of [(SIDep)HB=B(2-C<sub>5</sub>H<sub>4</sub>N)(SIDep)][AuCl][CuCl] (3-CuAu)

**Route a:** 2-AuCl (39.0 mg, 39 μmol, 1.00 equiv) and [Cu(SMe<sub>2</sub>)Cl] (6.3 mg, 20 μmol, 1.00 equiv) were combined in benzene (0.6 mL) and stirred at room temperature for 30 minutes. The volatiles were removed *in vacuo* and the residue was washed with *n*-hexane (1 mL). After drying under reduced pressure, the residue was extracted with benzene and by slow diffusion of *n*-pentane into the solution the product crystallized as red needles (28.3 mg, 25 μmol, 64%), which were also suitable for X-ray diffractometry.

**Route b:** 3-CuCl (20 mg, 21 μmol, 1.00 equiv) and [AuCl(PPh<sub>3</sub>)] (10.4 mg, 21 μmol, 1.00 equiv) were combined in benzene (0.6 mL) and stirred at room temperature for 30 minutes. The suspension was filtered, and all volatiles were removed *in vacuo*. The residue was washed with *n*-hexane (3 x 0.5 mL) and extracted with benzene. By slow diffusion of *n*-pentane into the solution the product crystallized as red needles (12.1 mg, 11 μmol, 52%).

<sup>1</sup>H{<sup>11</sup>B} NMR (600.2 MHz, C<sub>6</sub>D<sub>6</sub>): δ = 8.03 – 8.02 (m, 1H, H<sup>Py<sup>r</sup></sup>), 7.04 – 7.03 (m, 2H, H<sup>Ar</sup>), 6.96 – 6.92 (m, 6H, H<sup>Ar</sup>), 6.70 – 6.69 (m, 2H, H<sup>Ar</sup>), 6.44 – 6.43 (m, 2H, H<sup>Ar</sup>), 6.12 – 6.07 (m, 2H, H<sup>Py<sup>r</sup></sup>), 5.74 – 5.73 (m, 1H, H<sup>Py<sup>r</sup></sup>), 3.83 (dq, <sup>2</sup>J<sub>HH</sub> = 15.0 Hz, <sup>3</sup>J<sub>HH</sub> = 7.5 Hz, 2H, CH<sub>2</sub><sup>Et</sup>), 3.42 (dq, <sup>2</sup>J<sub>HH</sub> = 15.2 Hz, <sup>3</sup>J<sub>HH</sub> = 7.6 Hz, 2H, CH<sub>2</sub><sup>Et</sup>), 3.12 – 3.95 (m, 10H, CH<sub>2</sub><sup>Et</sup> + NCH<sub>2</sub>), 2.84 (br s, BH), 2.81 – 2.64 (m, 6H, CH<sub>2</sub><sup>Et</sup>), 2.41 – 2.27 (m, 4H, CH<sub>2</sub><sup>Et</sup>), 1.38 – 1.33 (two overlapping t, <sup>3</sup>J<sub>HH</sub> = 7.6 Hz, 7.6 Hz, 12H, CH<sub>3</sub><sup>Et</sup>), 1.27 (t, <sup>3</sup>J<sub>HH</sub> = 7.6 Hz, 6H, CH<sub>3</sub><sup>Et</sup>), 1.05 (t, <sup>3</sup>J<sub>HH</sub> = 7.5 Hz, 6H, CH<sub>3</sub><sup>Et</sup>) ppm.

<sup>13</sup>C{<sup>1</sup>H, <sup>11</sup>B} NMR (150.9 MHz, C<sub>6</sub>D<sub>6</sub>): δ = 185.5 (C<sup>Carbene</sup>), 184.0 (C<sup>Carbene</sup>), 173.1 (C<sup>2-Py<sup>r</sup></sup>), 145.5 (C<sup>Py<sup>r</sup></sup>), 142.1 (C<sup>q</sup>), 141.3 (C<sup>q</sup>), 141.1 (C<sup>q</sup>), 141.0 (C<sup>q</sup>), 137.0 (C<sup>q</sup>), 137.3 (C<sup>q</sup>), 133.7 (C<sup>Py<sup>r</sup></sup>), 128.8 (C<sup>Ar</sup>), 128.5 (C<sup>Ar</sup>), 128.4 (C<sup>Ar</sup>), 127.3 (C<sup>Ar</sup>), 126.6 (C<sup>Ar</sup>), 126.5 (C<sup>Ar</sup>), 126.4 (C<sup>Ar</sup>), 117.7 (CH<sup>Py<sup>r</sup></sup>), 52.2 (NCH<sub>2</sub>), 51.6 (NCH<sub>2</sub>), 26.3 (CH<sub>2</sub><sup>Et</sup>), 25.4 (CH<sub>2</sub><sup>Et</sup>), 25.2 (CH<sub>2</sub><sup>Et</sup>), 24.1 (CH<sub>2</sub><sup>Et</sup>), 14.9 (CH<sub>3</sub><sup>Et</sup>), 14.5 (CH<sub>3</sub><sup>Et</sup>), 14.3 (CH<sub>3</sub><sup>Et</sup>), 14.1 (CH<sub>3</sub><sup>Et</sup>) ppm.

<sup>11</sup>B{<sup>1</sup>H} NMR (192.7 MHz, C<sub>6</sub>D<sub>6</sub>): δ = 4.7 (NCB), -3.4 (BH) ppm.

UV-vis (C<sub>6</sub>H<sub>6</sub>): λ<sub>max</sub> = 446 nm.

## NMR spectra of isolated compounds

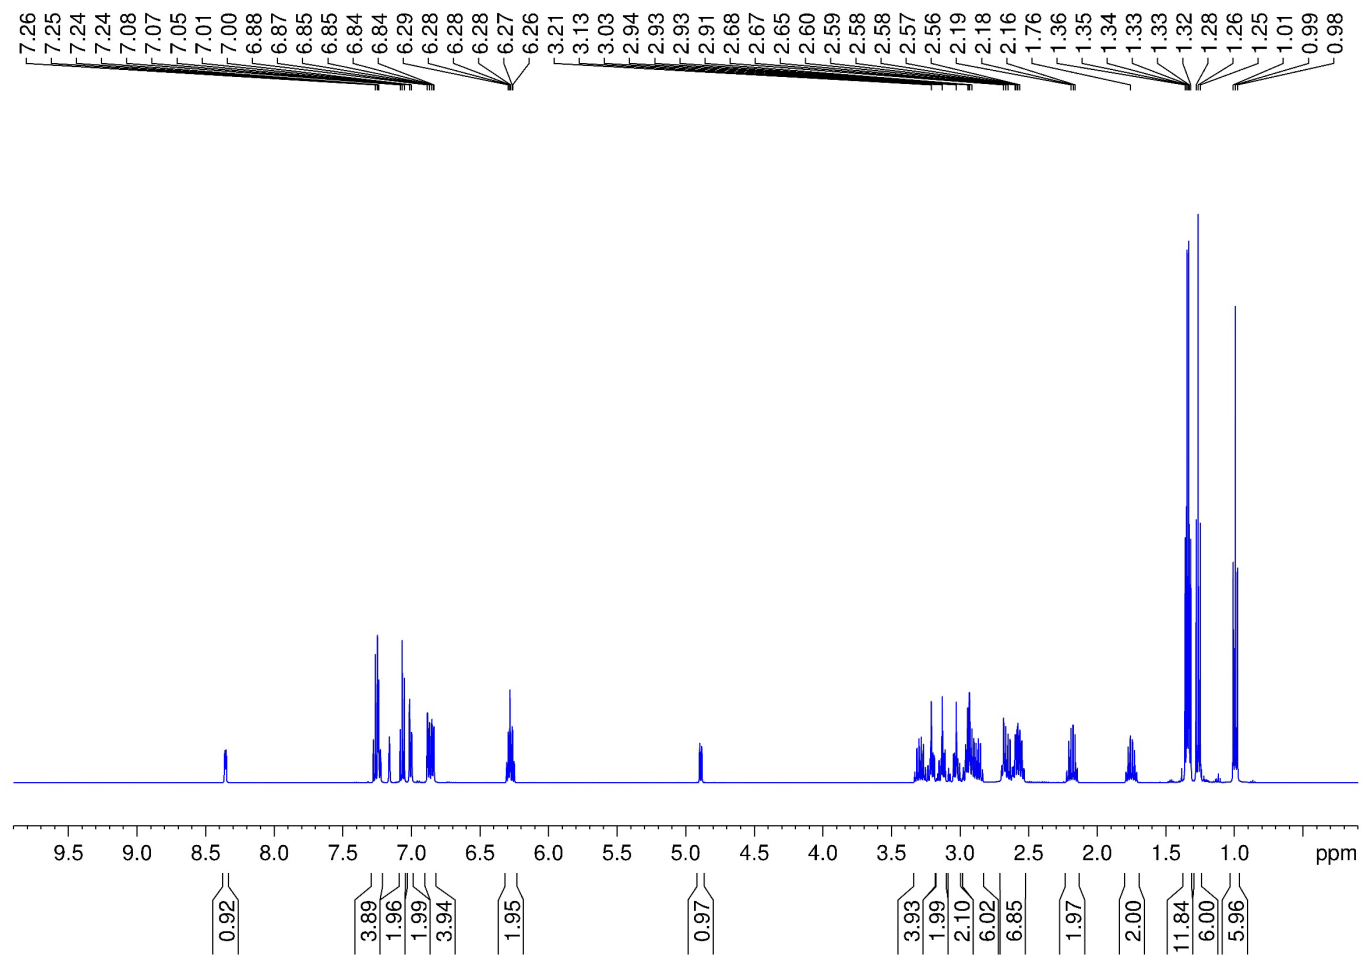

**Fig. S1**  $^1\text{H}\{^{11}\text{B}\}$  NMR spectrum of 2-CuCl in  $\text{C}_6\text{D}_6$ .

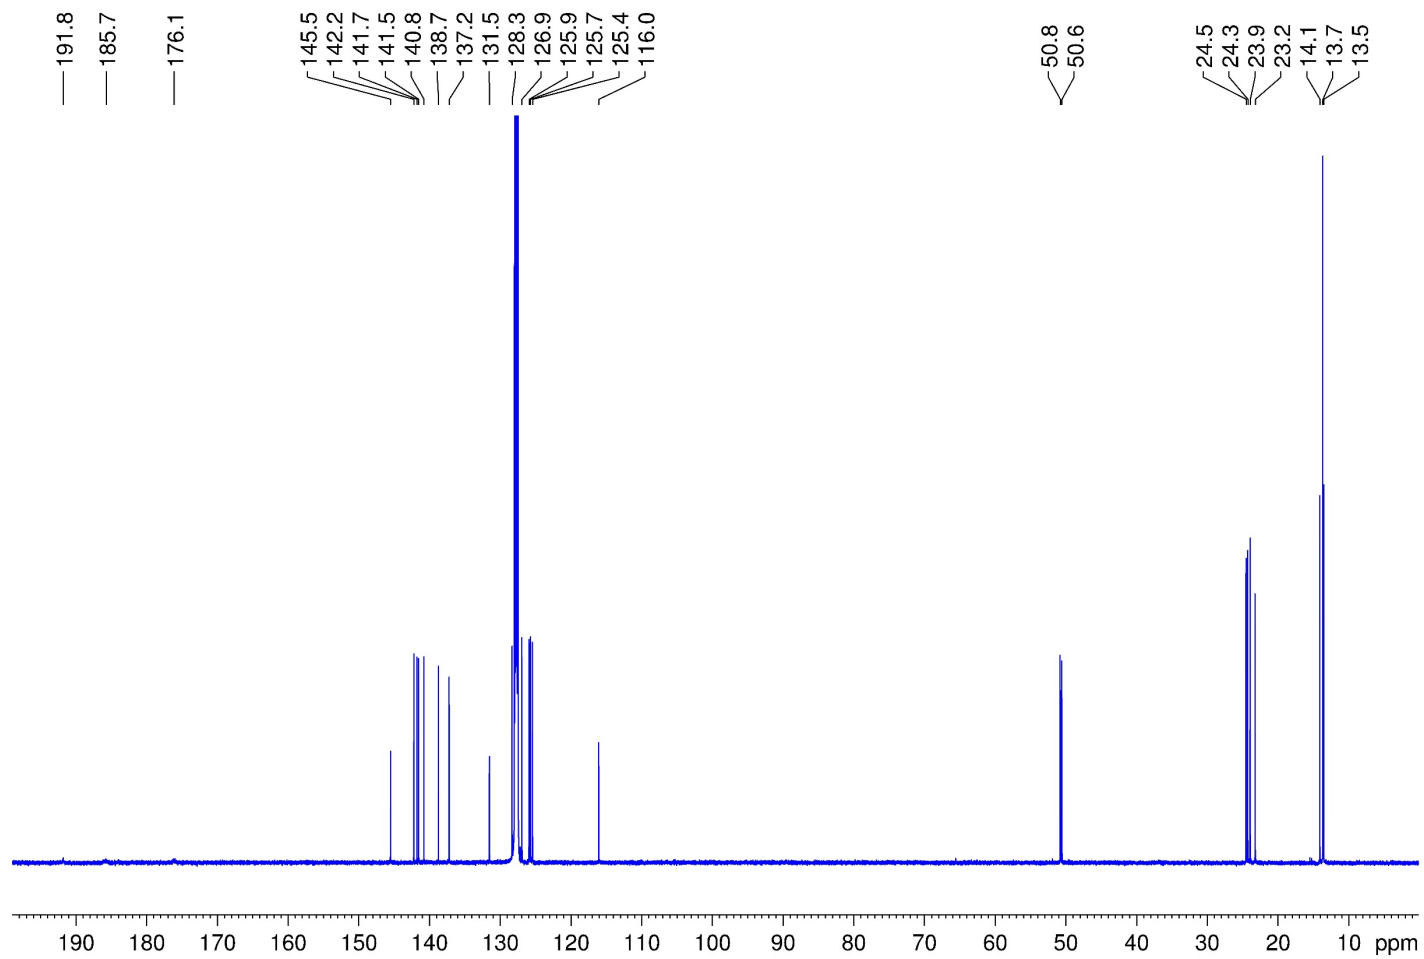

**Fig. S2**  $^{13}\text{C}\{^1\text{H}\}$  NMR spectrum of 2-CuCl in  $\text{C}_6\text{D}_6$ .

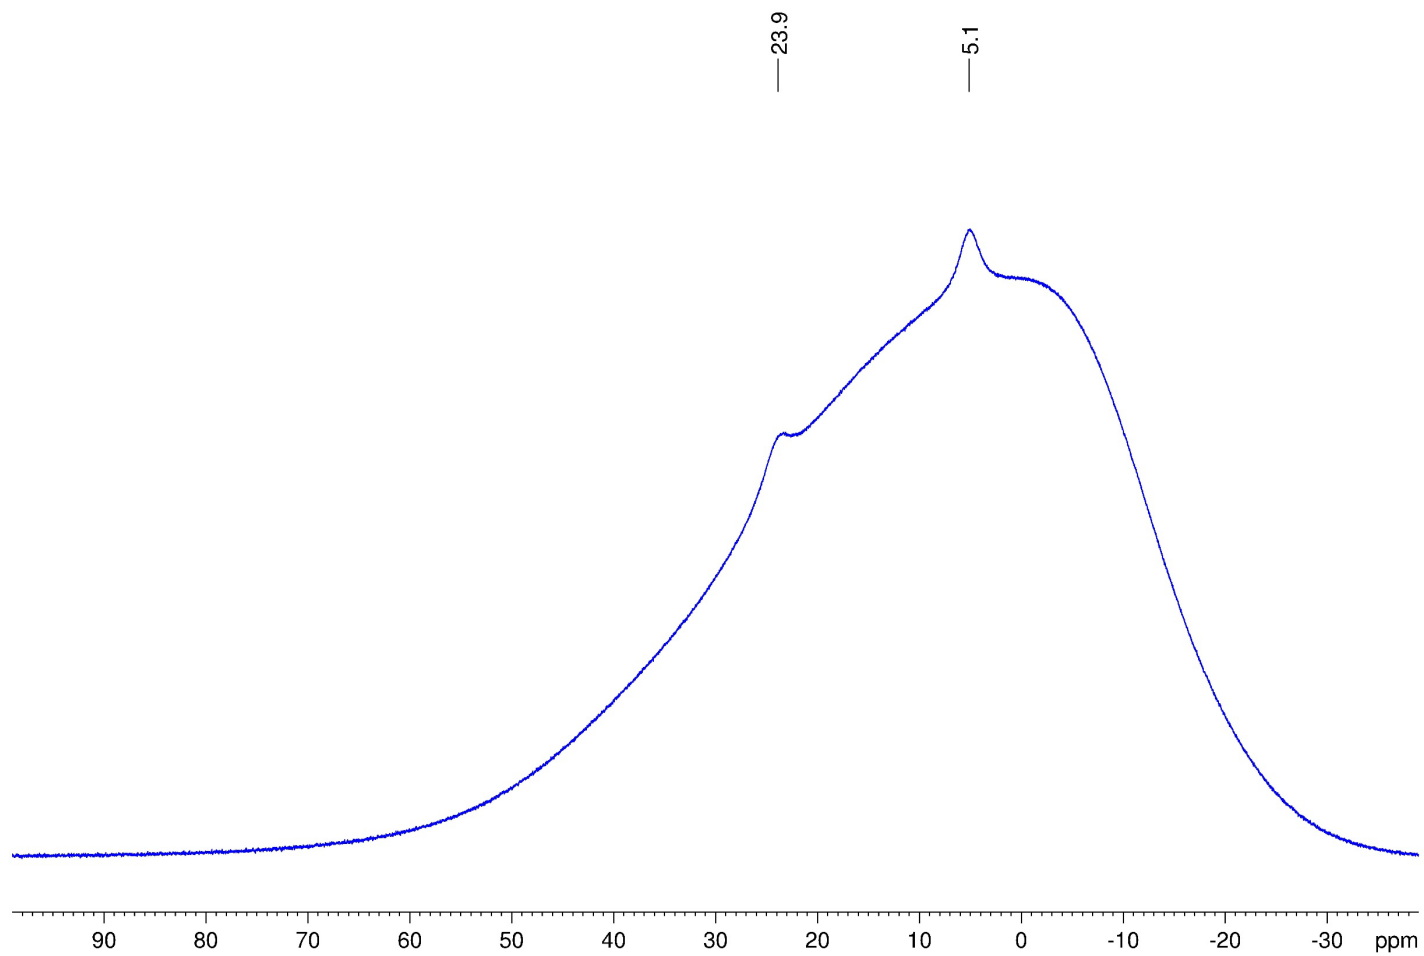

**Fig. S3**  $^{11}\text{B}\{^1\text{H}\}$  NMR spectrum of 2-CuCl in  $\text{C}_6\text{D}_6$ .

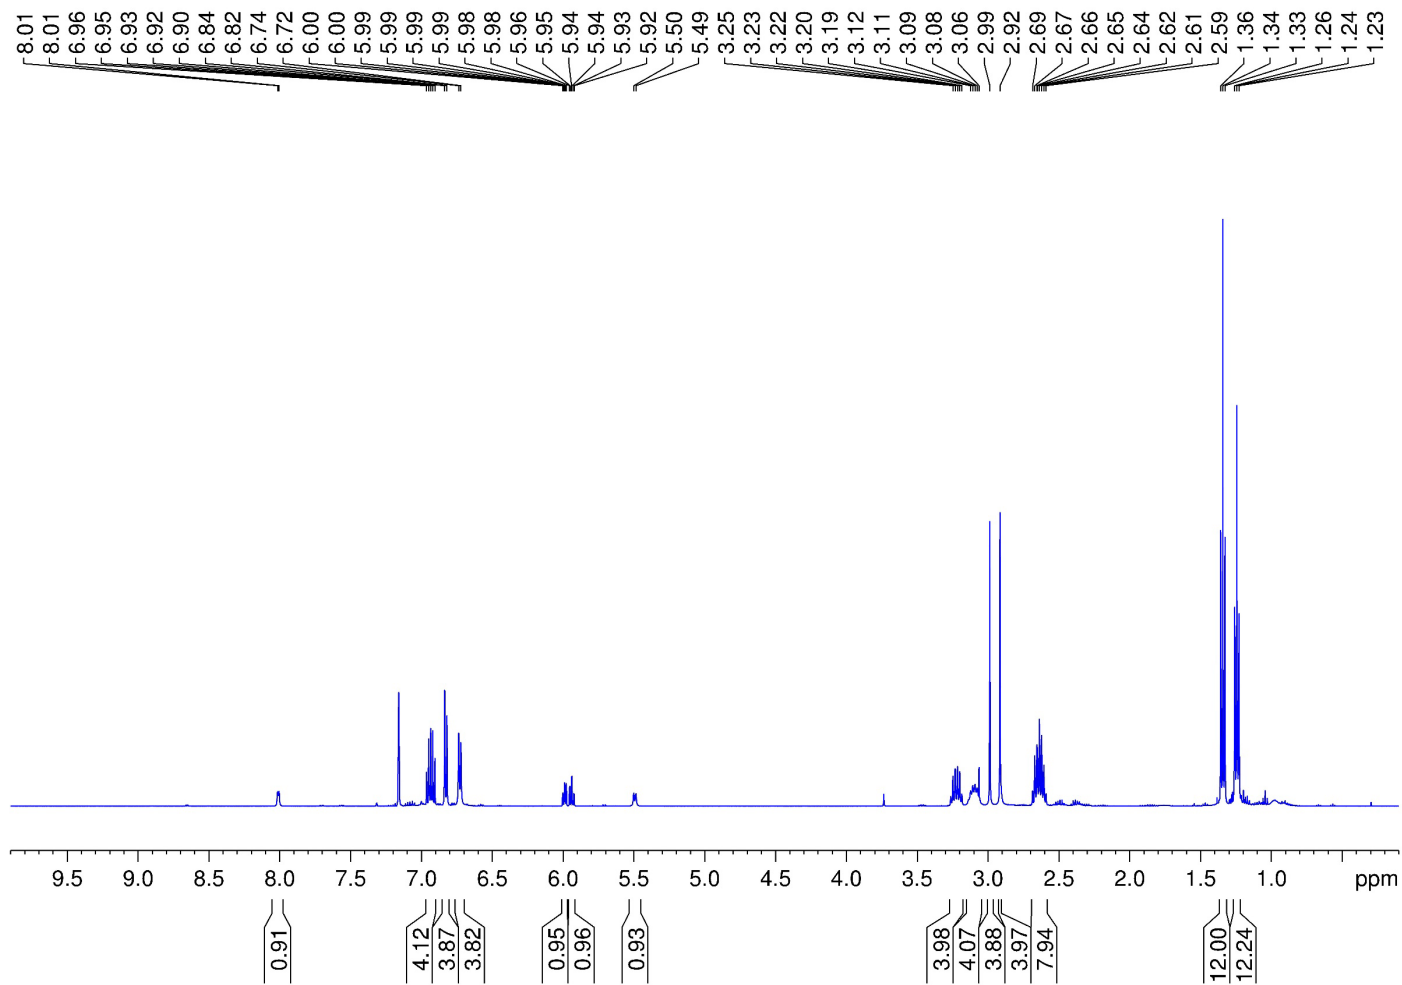

**Fig. S4**  $^1\text{H}\{^{11}\text{B}\}$  NMR spectrum of **3-CuCl** in  $\text{C}_6\text{D}_6$ .

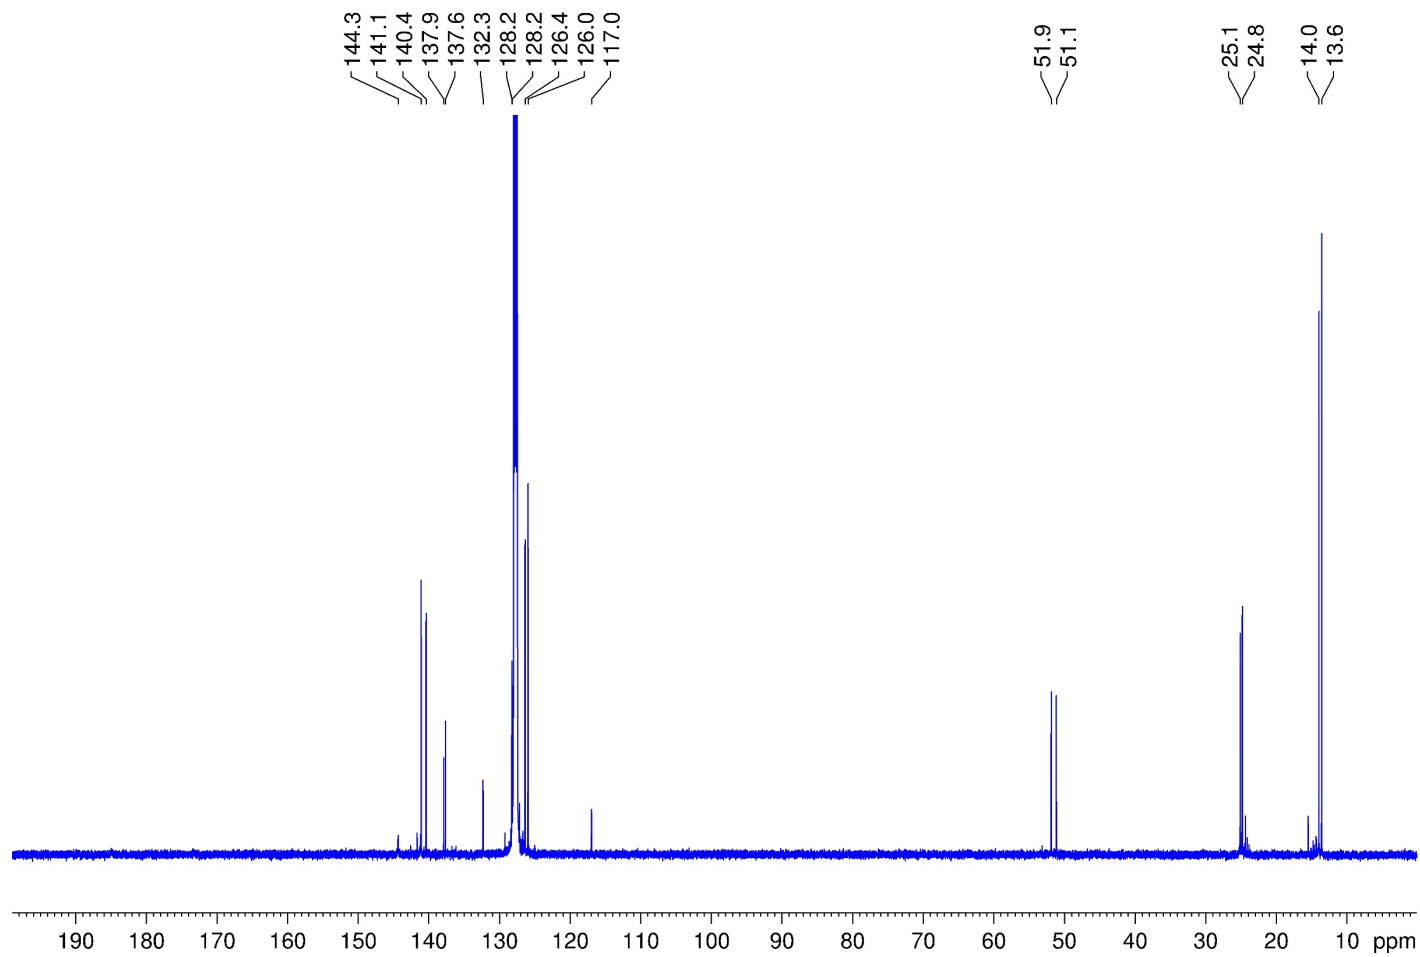

Fig. S5  $^{13}\text{C}\{^1\text{H}\}$  NMR spectrum of 3-CuCl in  $\text{C}_6\text{D}_6$ .

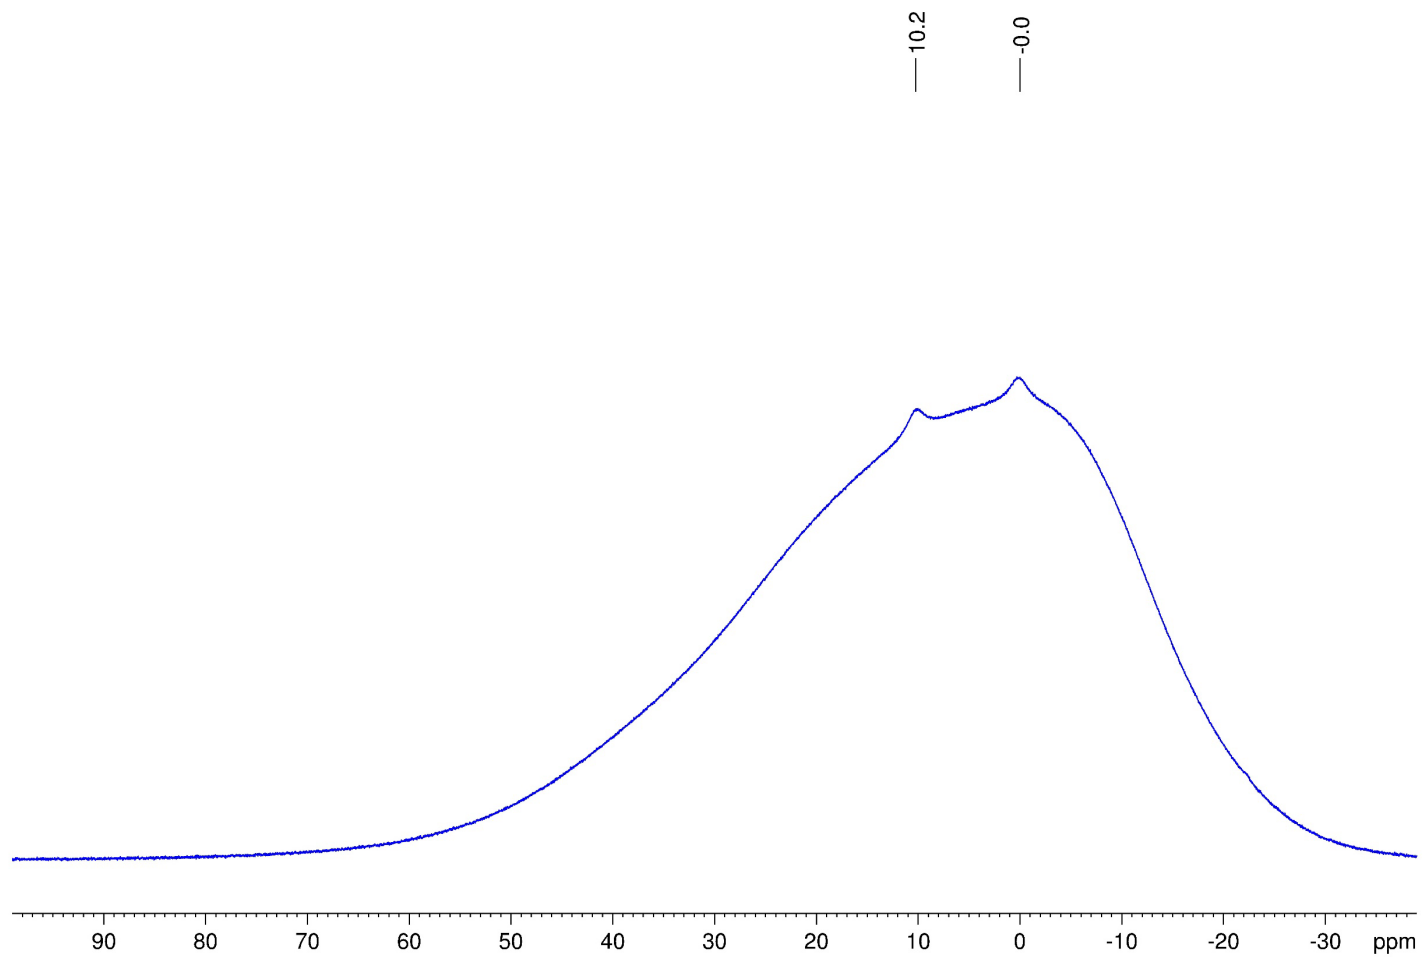

**Fig. S6**  $^{11}\text{B}\{^1\text{H}\}$  NMR spectrum of **3-CuCl** in  $\text{C}_6\text{D}_6$ .

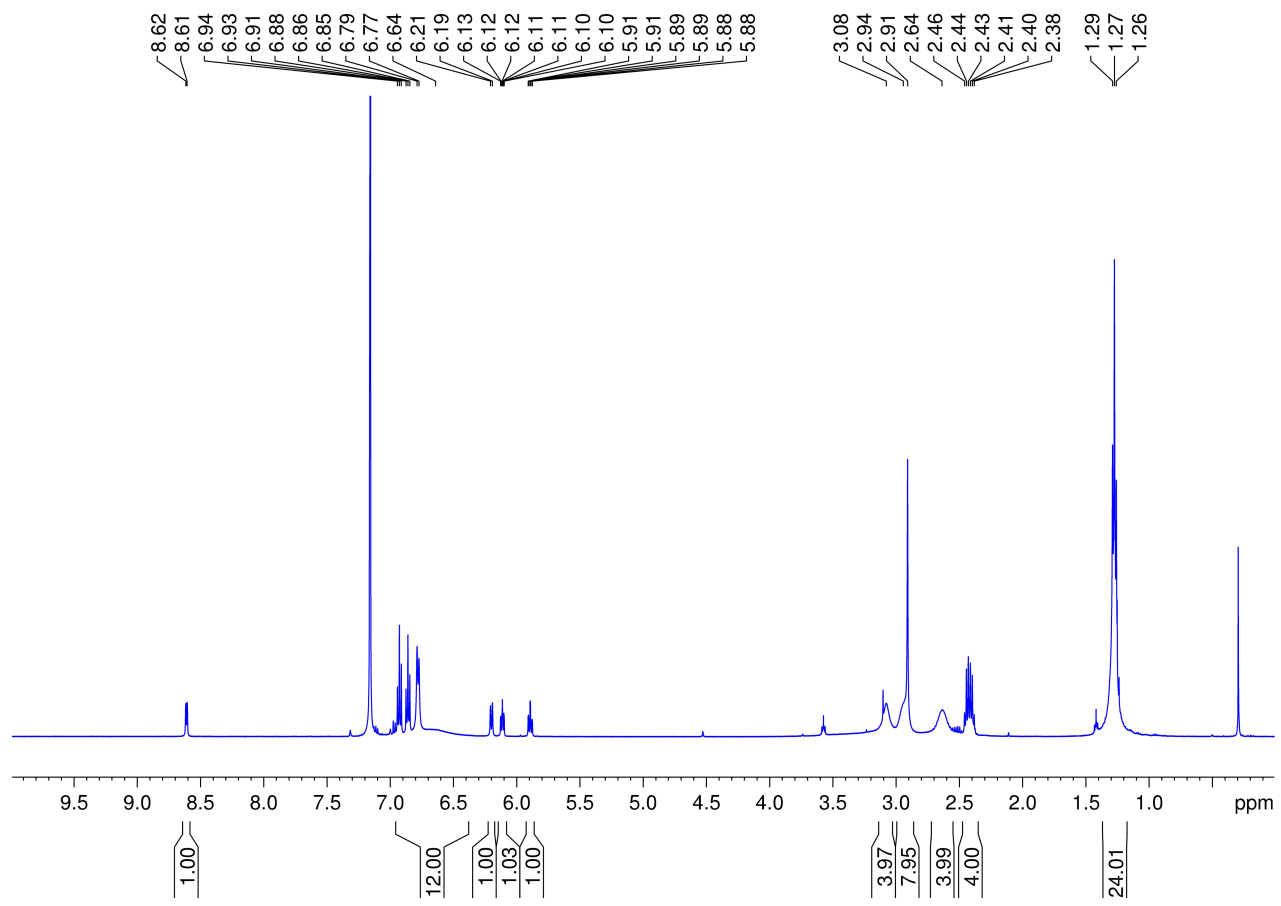

**Fig. S7**  $^1\text{H}\{^{11}\text{B}\}$  NMR spectrum of **4-Cu** in  $\text{C}_6\text{D}_6$ .



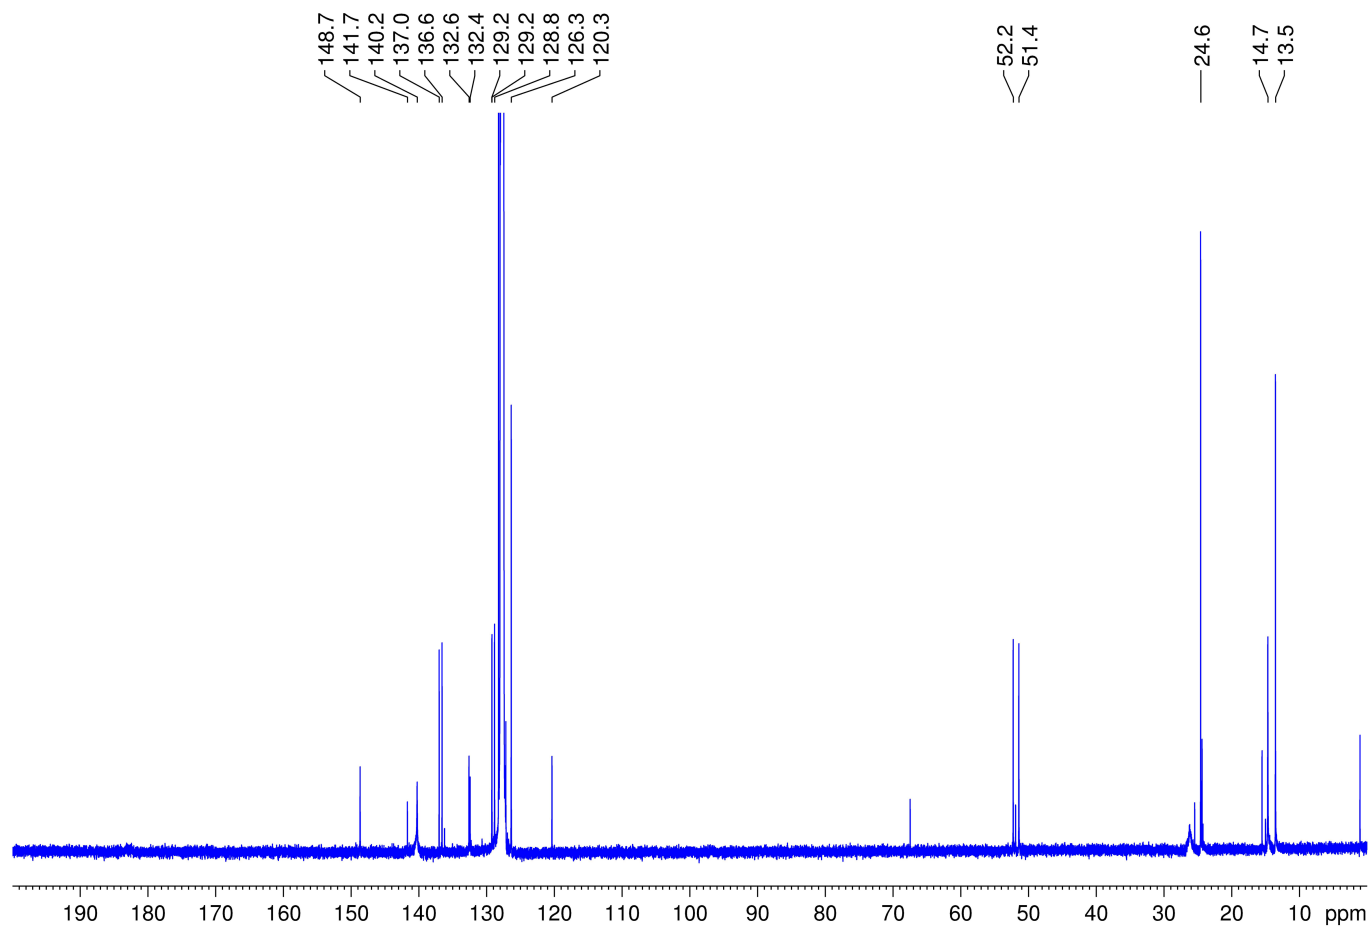

**Fig. S8**  $^{13}\text{C}\{^1\text{H}\}$  NMR spectrum of **4-Cu** in  $\text{C}_6\text{D}_6$ .

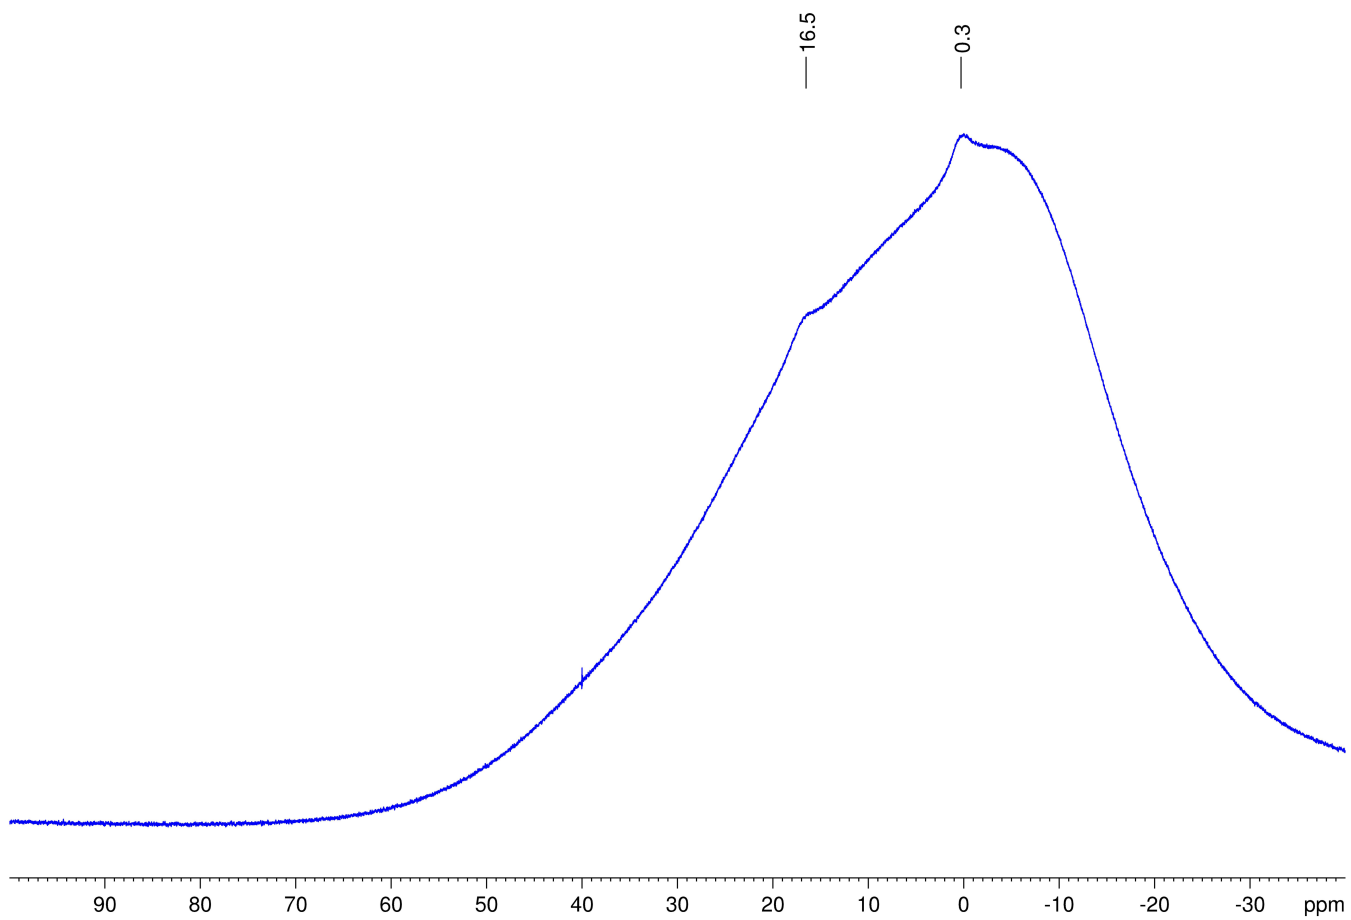

**Fig. S9**  $^{11}\text{B}\{^1\text{H}\}$  NMR spectrum of **4-Cu** in  $\text{C}_6\text{D}_6$ .

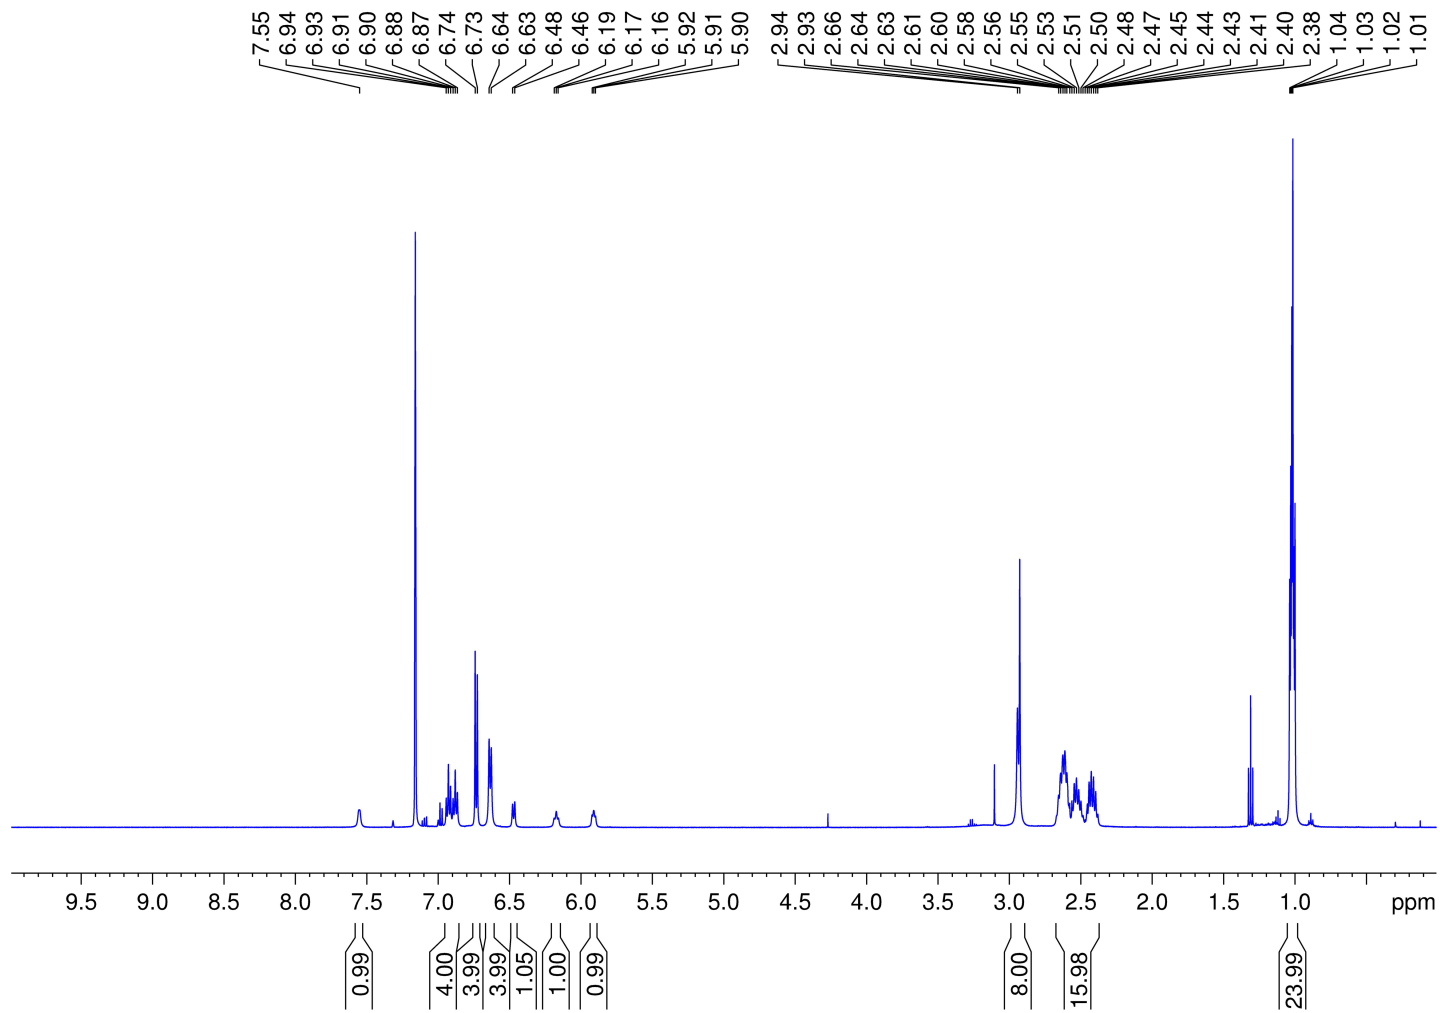

**Fig. S10**  $^1\text{H}\{^{11}\text{B}\}$  NMR spectrum of  $3\text{-CuC}_6\text{F}_5$  in  $\text{C}_6\text{D}_6$ .

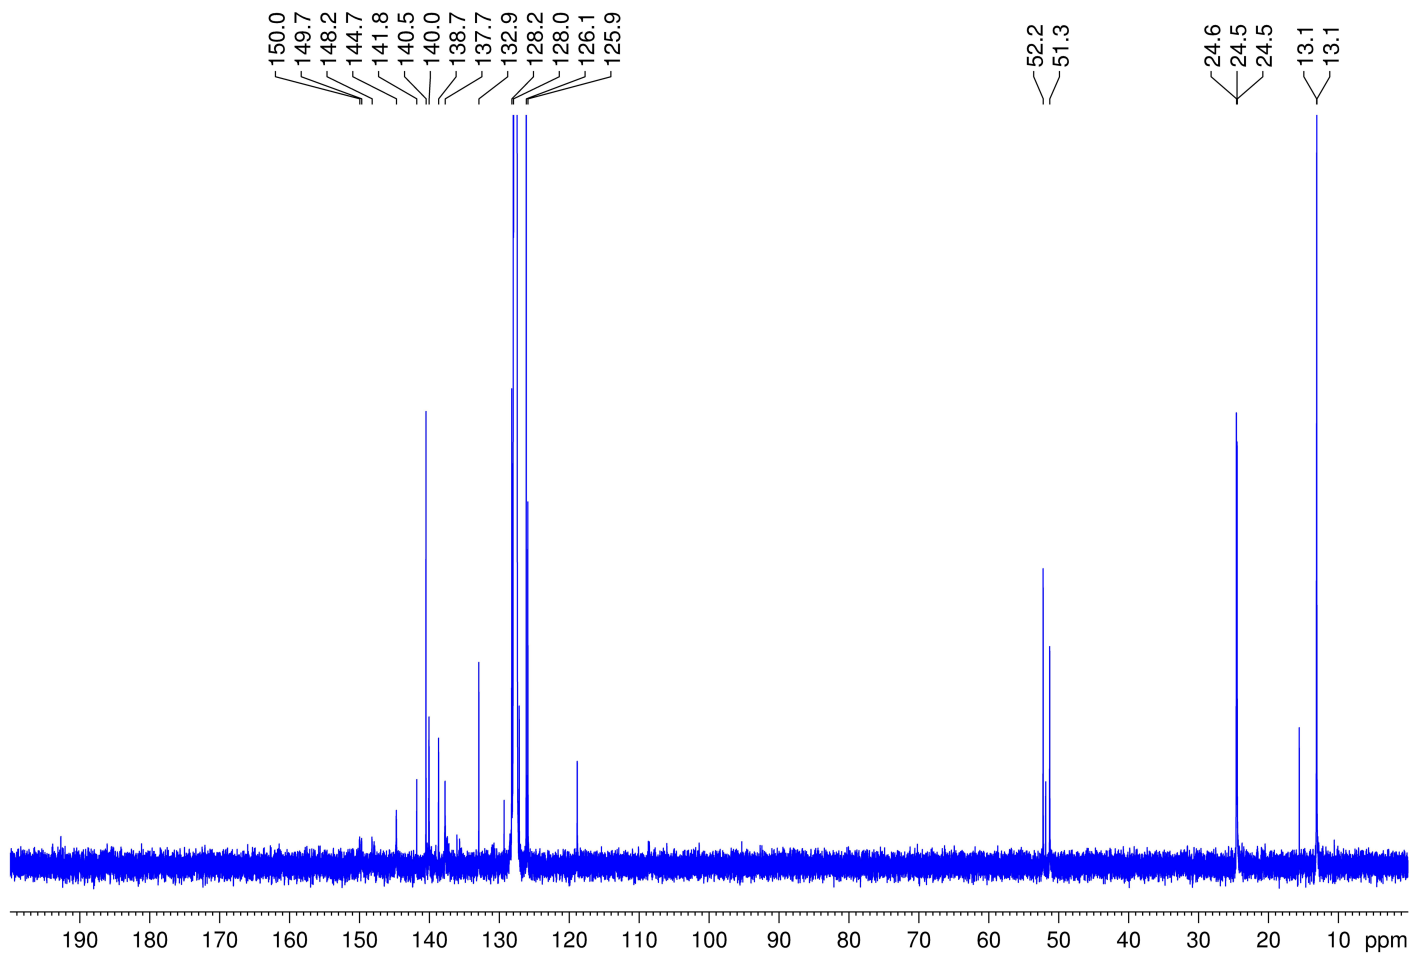

**Fig. S11**  $^{13}\text{C}\{^1\text{H}\}$  NMR spectrum of  $3\text{-CuC}_6\text{F}_5$  in  $\text{C}_6\text{D}_6$ .

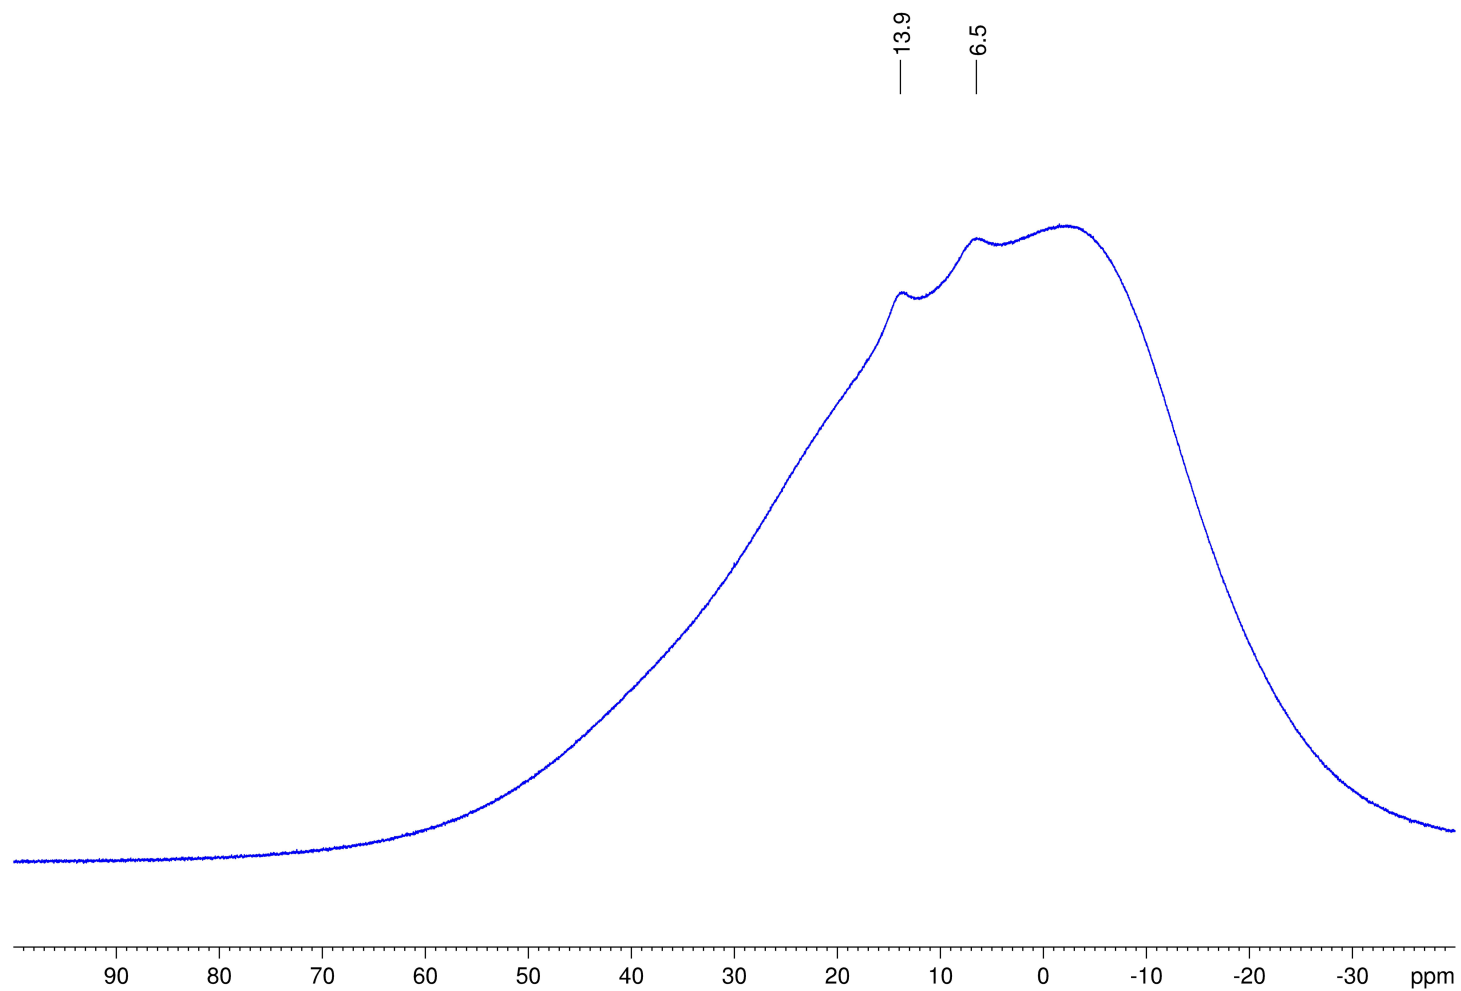

**Fig. S12**  $^{11}\text{B}\{^1\text{H}\}$  NMR spectrum of  $3\text{-CuC}_6\text{F}_5$  in  $\text{C}_6\text{D}_6$ .

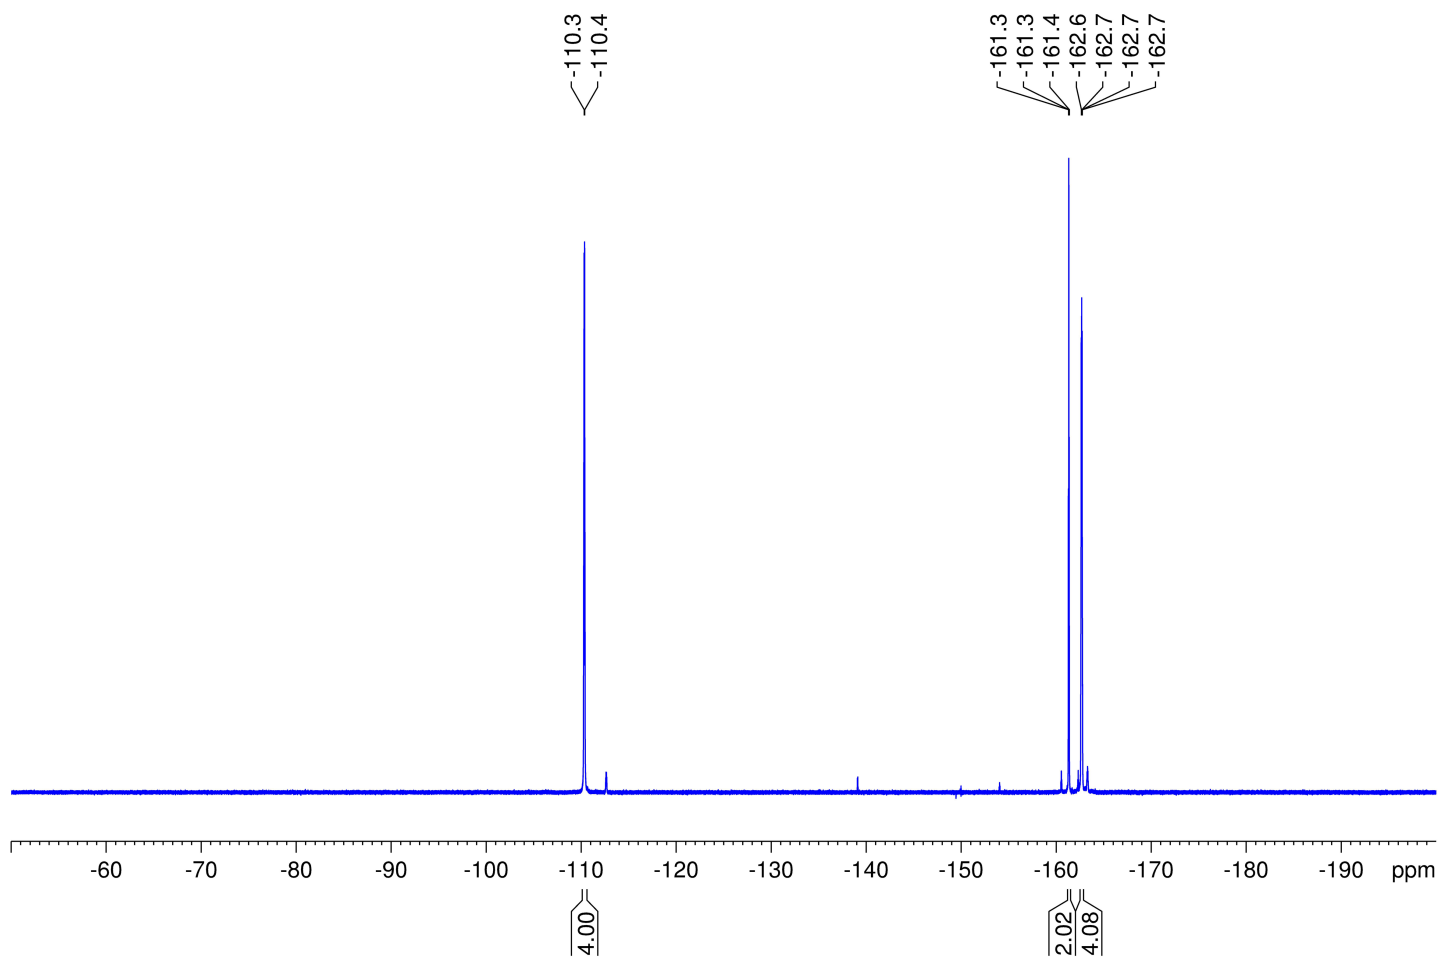

**Fig. S13**  $^{19}\text{F}$  NMR spectrum of  $3\text{-CuC}_6\text{F}_5$  in  $\text{C}_6\text{D}_6$ .

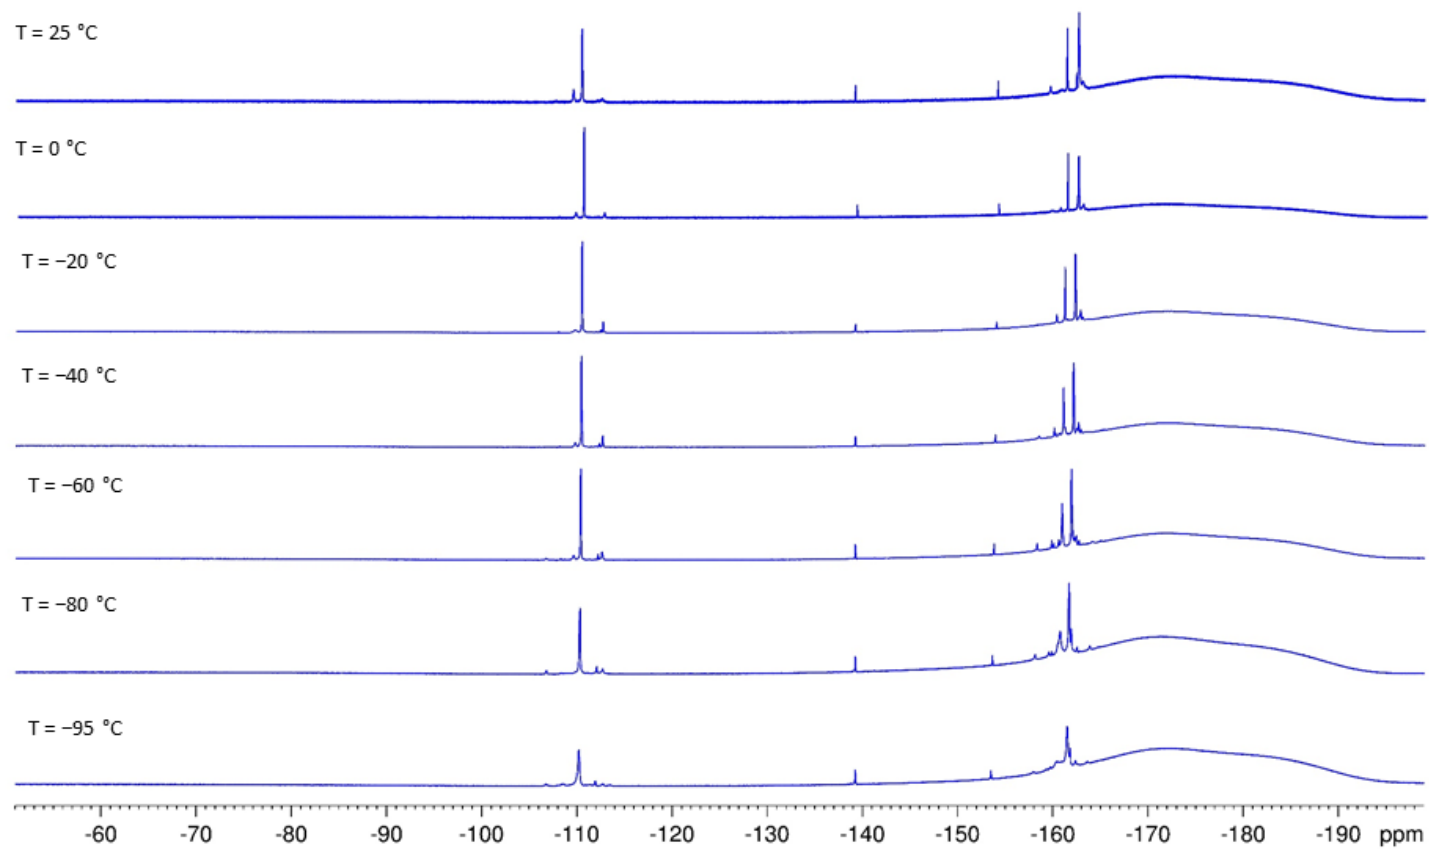

**Fig. S14**  $^{19}\text{F}$  VT NMR spectrum of  $3\text{-CuC}_6\text{F}_5$  in  $\text{Toluene-}d_8$ .

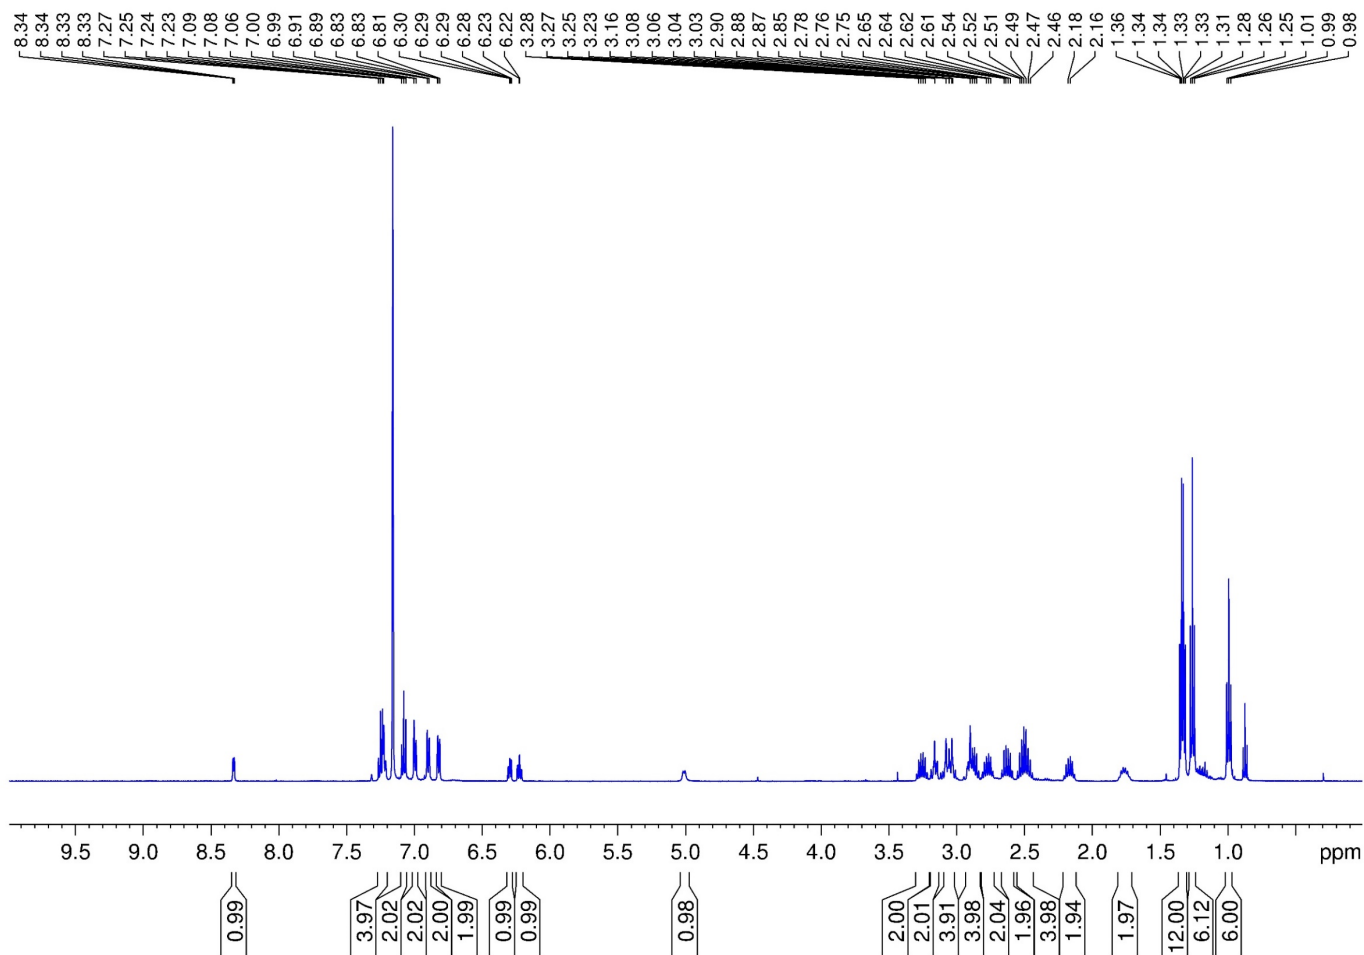

**Fig. S15**  $^1\text{H}\{^{11}\text{B}\}$  NMR spectrum of **2-AgCl** in  $\text{C}_6\text{D}_6$ .



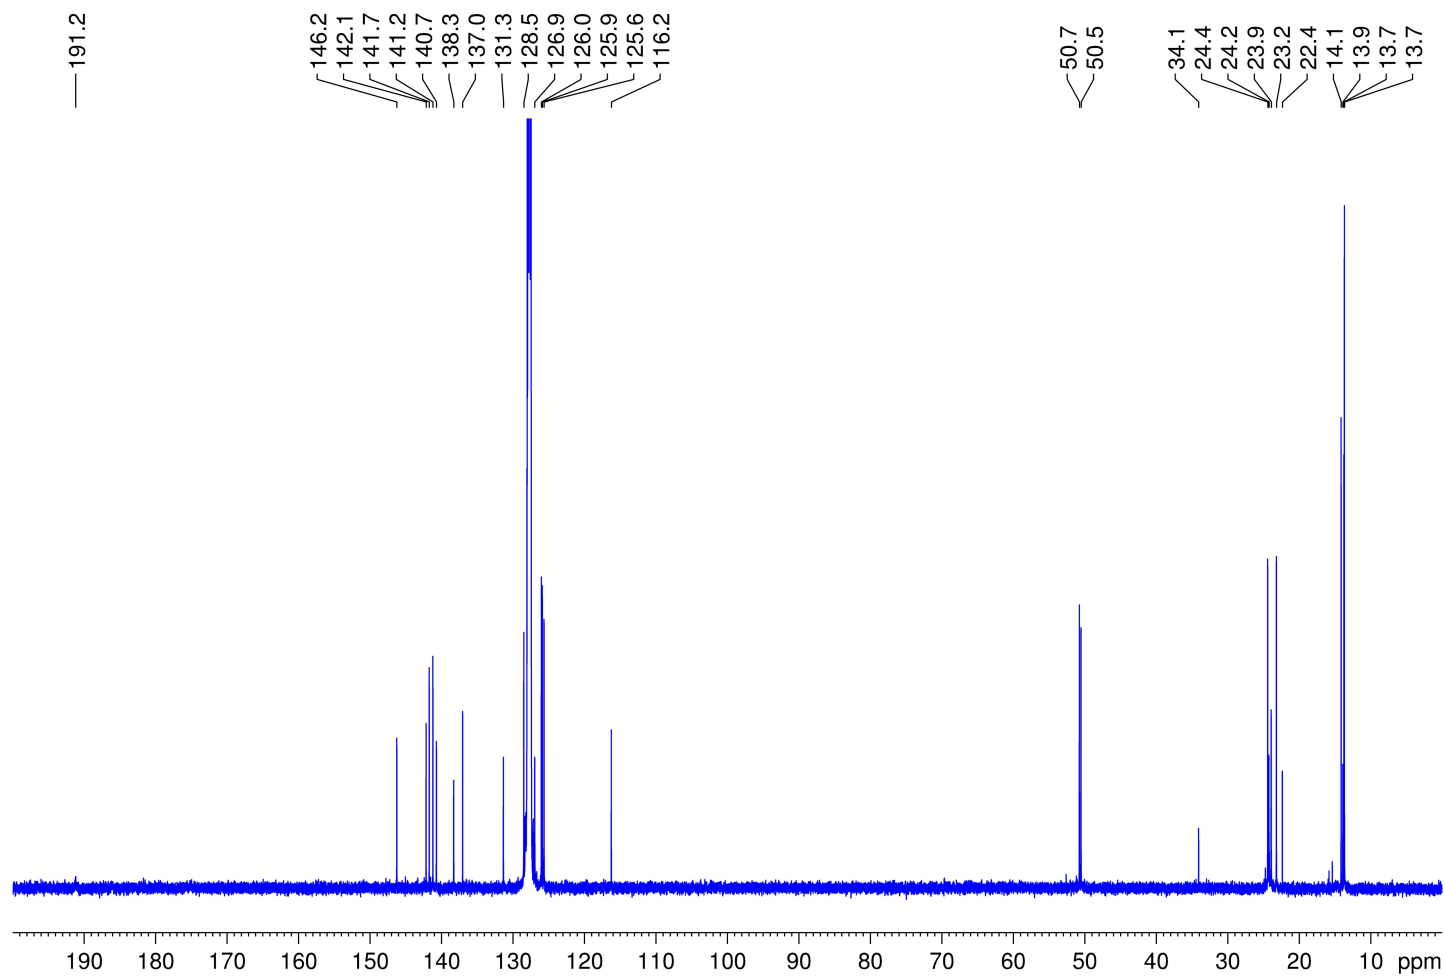

Fig. S16  $^{13}\text{C}\{^1\text{H}\}$  NMR spectrum of **2-AgCl** in  $\text{C}_6\text{D}_6$ .

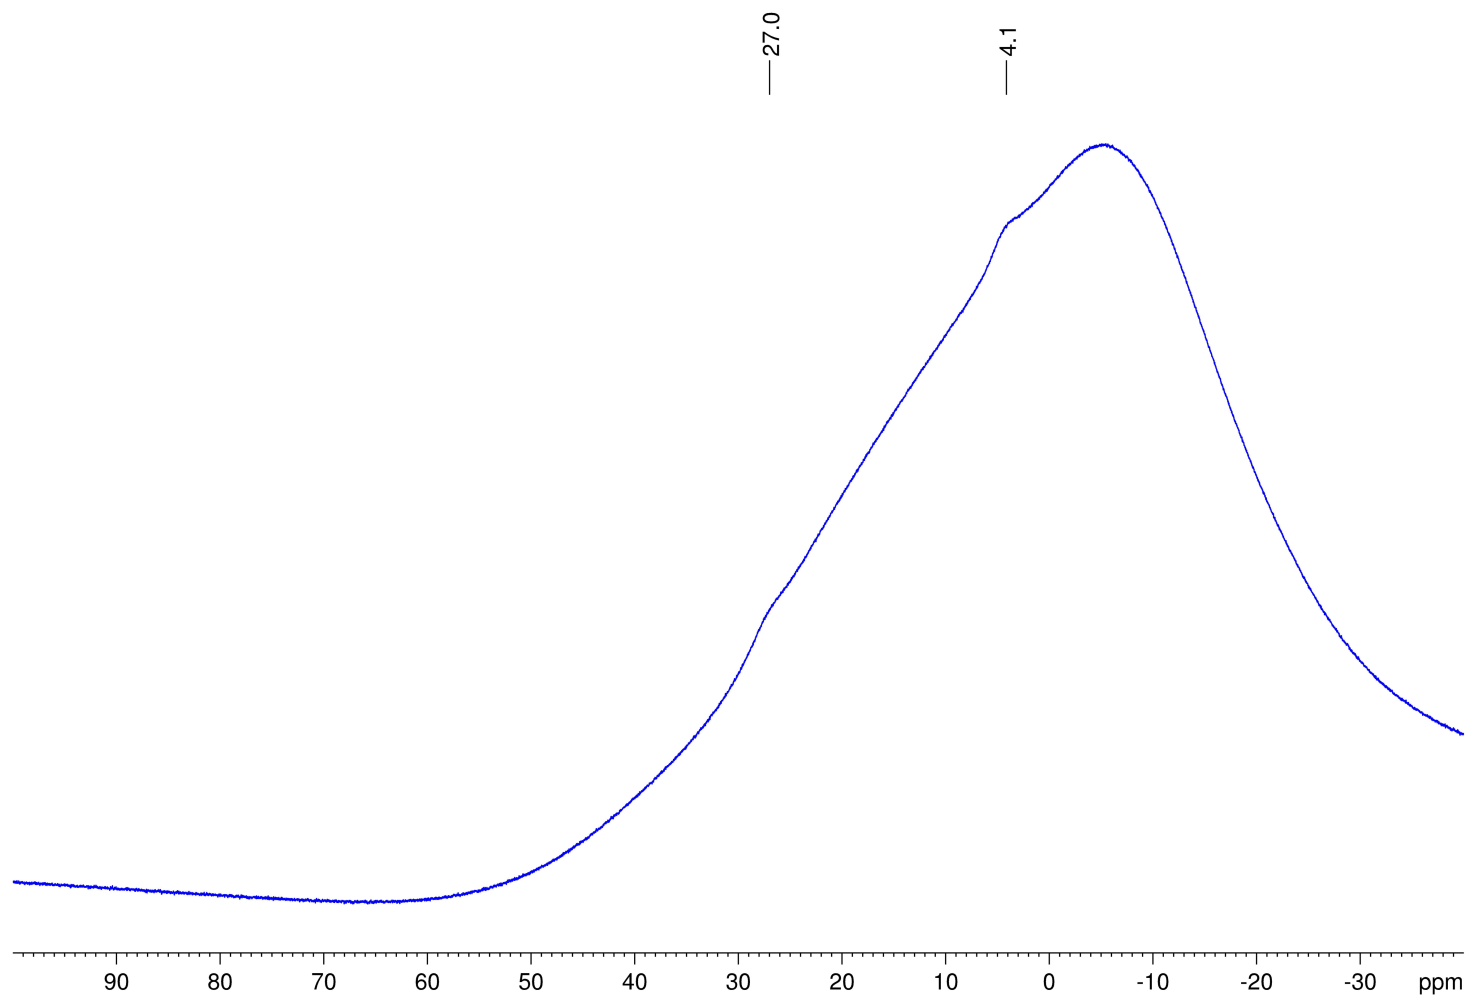

**Fig. S17**  $^{11}\text{B}$   $\{^1\text{H}\}$  NMR spectrum of **2-AgCl** in  $\text{C}_6\text{D}_6$ .

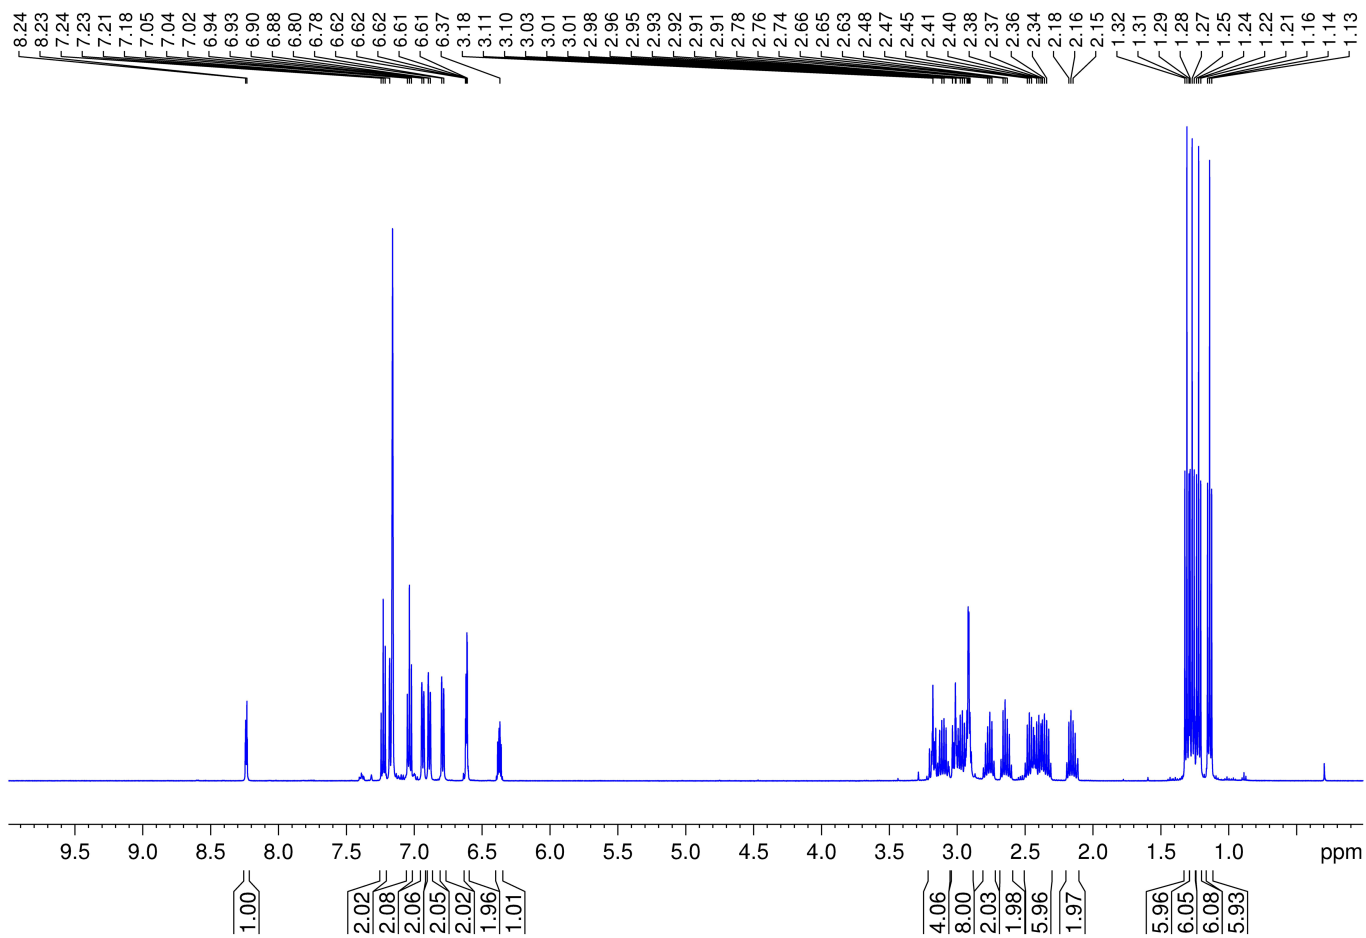

**Fig. S18**  $^1\text{H}\{^{11}\text{B}\}$  NMR spectrum of **2-AuCl** in  $\text{C}_6\text{D}_6$ .

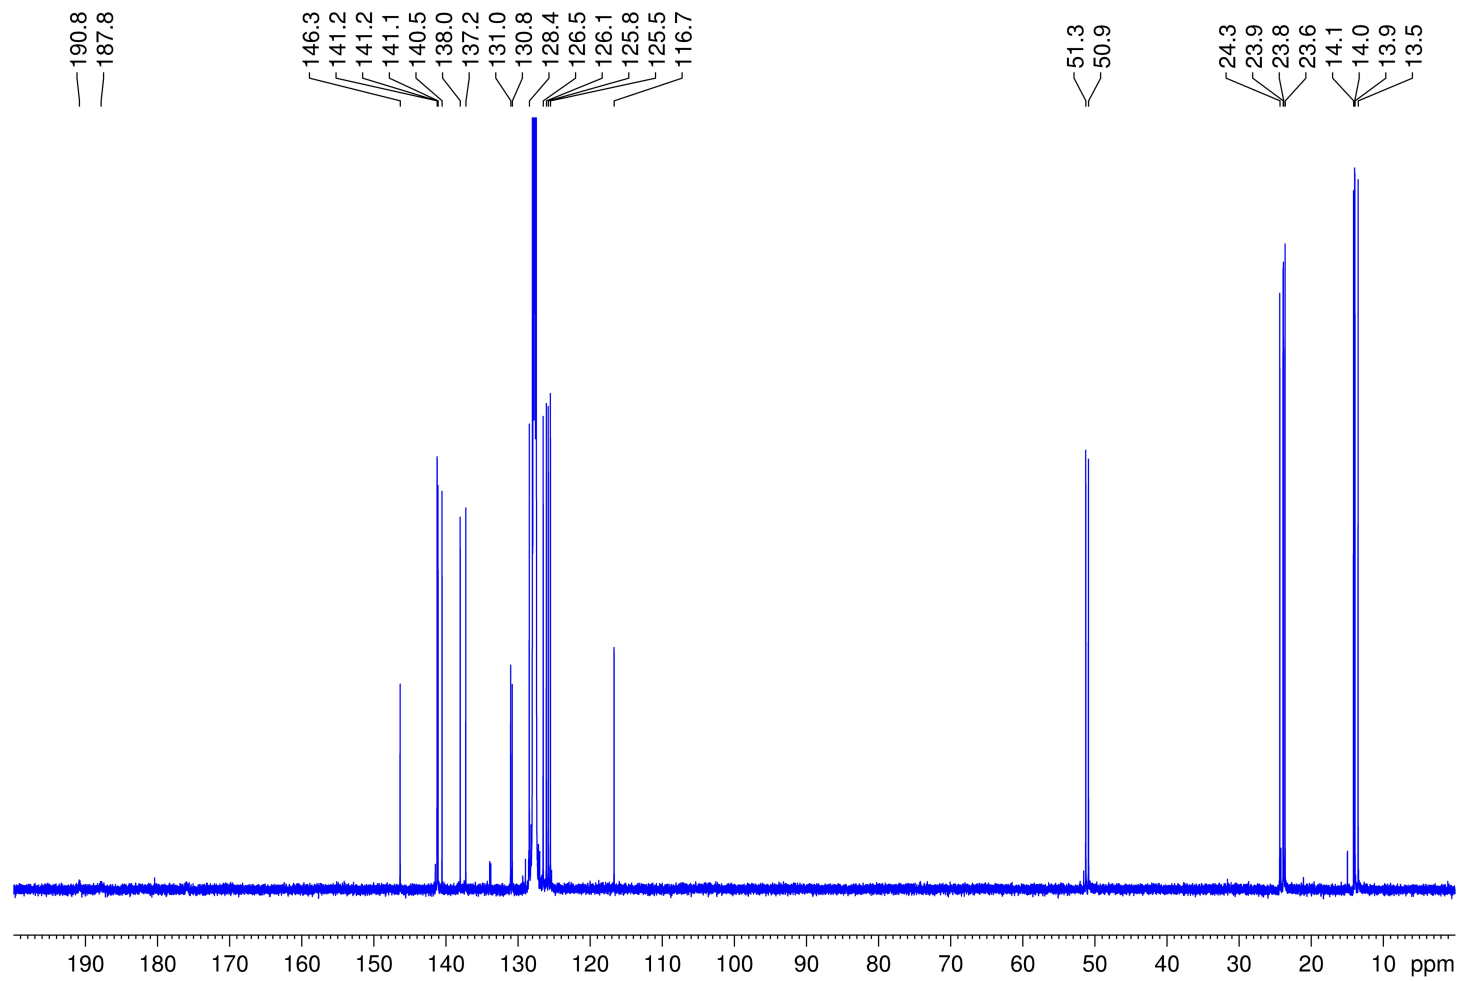

**Fig. S19**  $^{13}\text{C}\{^1\text{H}\}$  NMR spectrum of **2-AuCl** in  $\text{C}_6\text{D}_6$ .

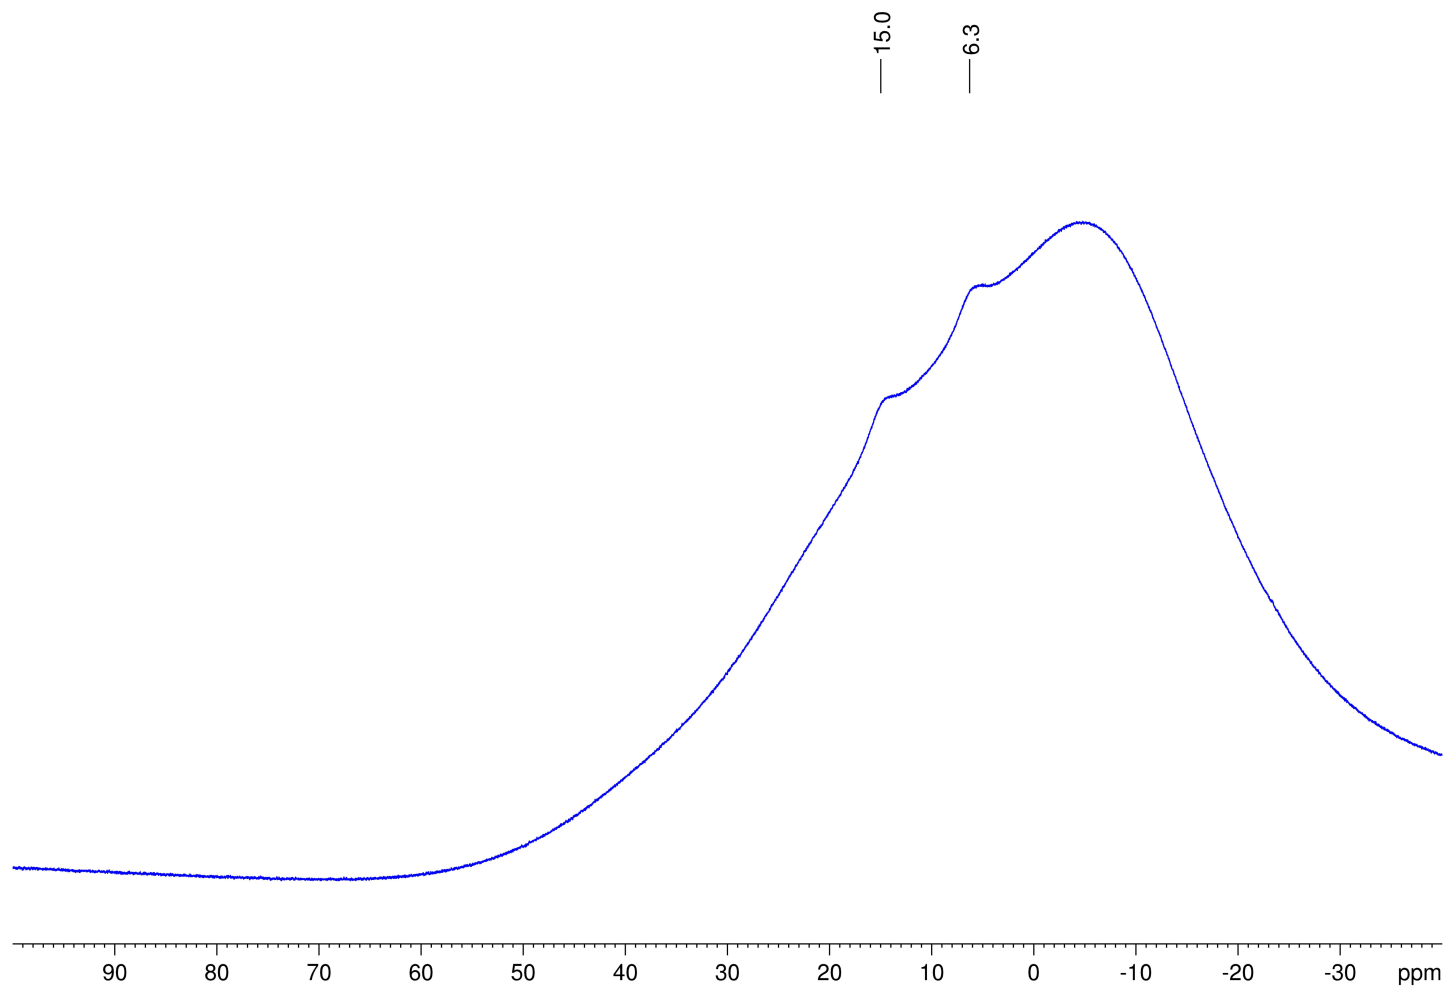

**Fig. S20**  $^{11}\text{B}\{^1\text{H}\}$  NMR spectrum of **2-AuCl** in  $\text{C}_6\text{D}_6$ .

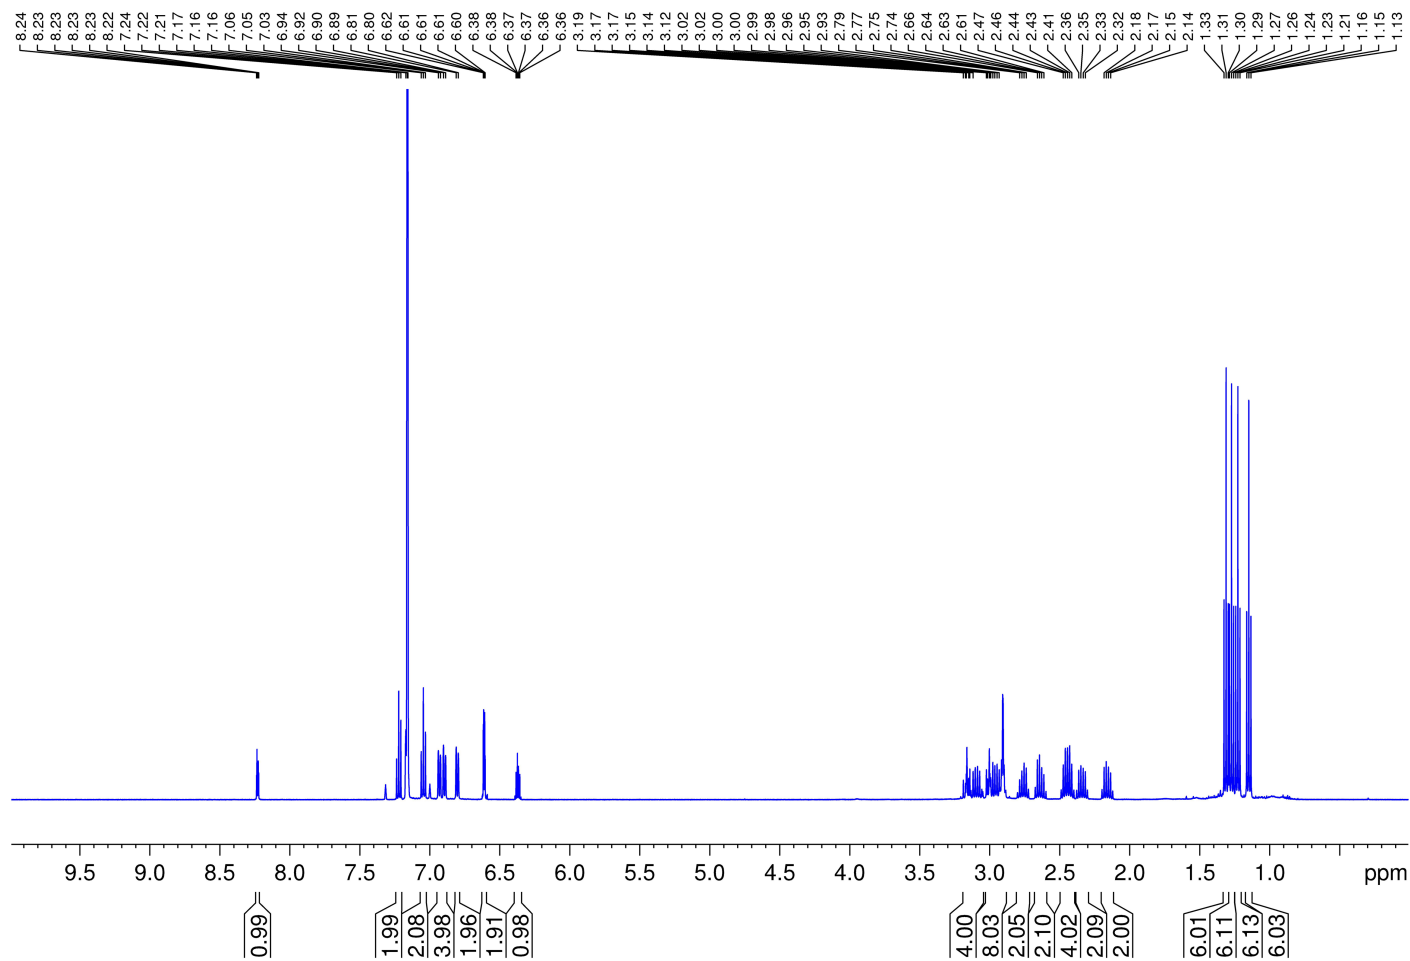

**Fig. S21**  $^1\text{H}\{^{11}\text{B}\}$  NMR spectrum of **2-AuBr** in  $\text{C}_6\text{D}_6$ .

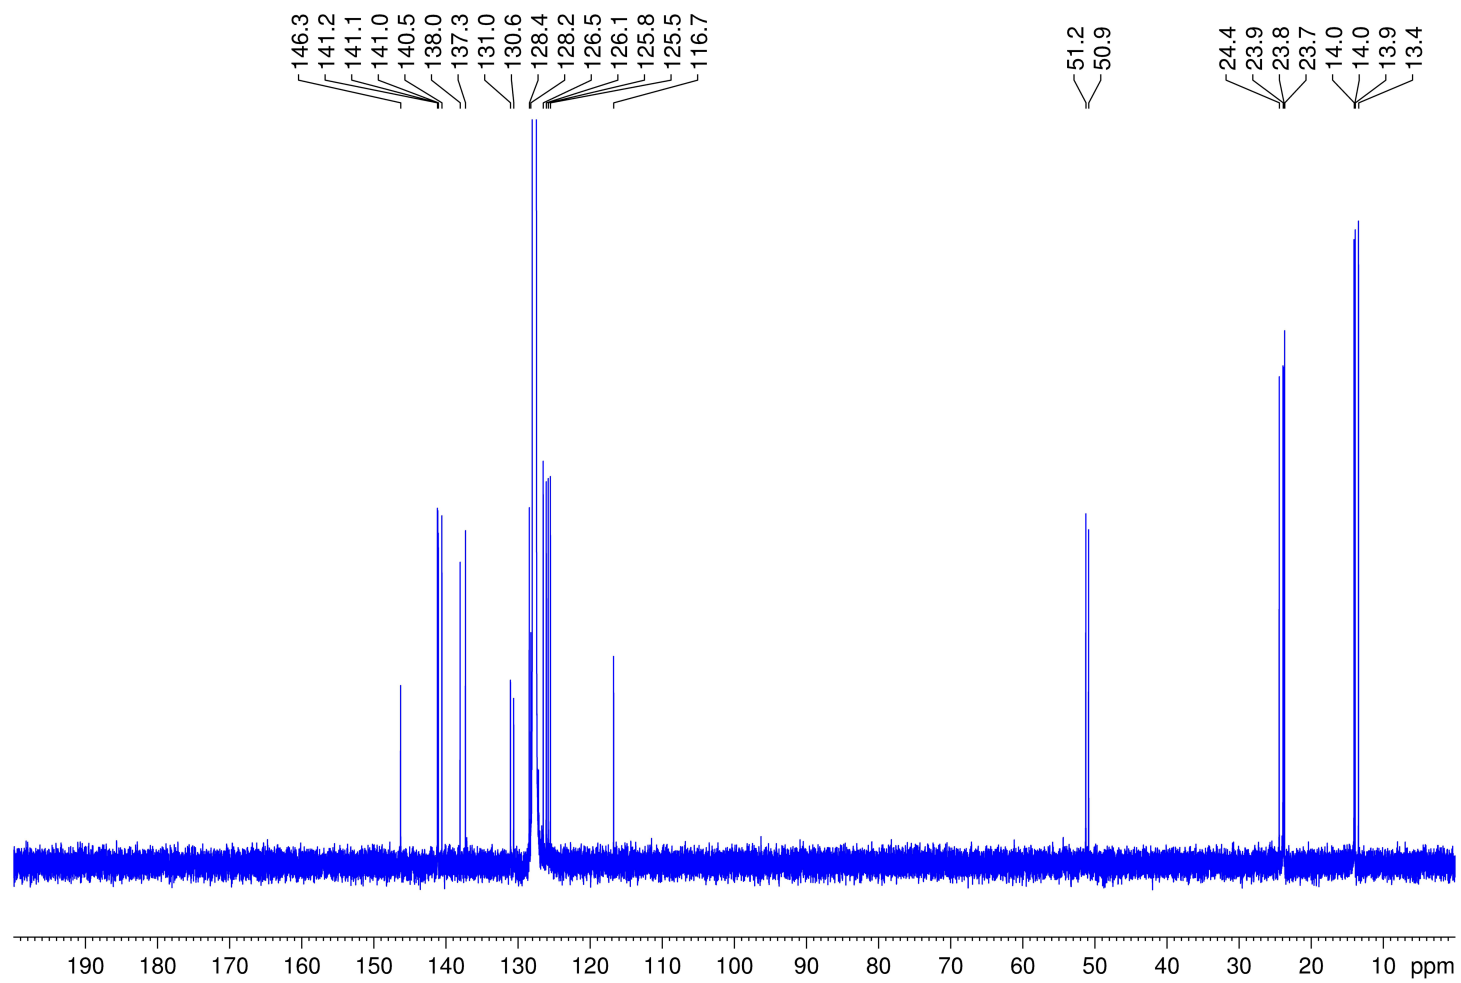

**Fig. S22**  $^{13}\text{C}\{^1\text{H}\}$  NMR spectrum of **2-AuBr** in  $\text{C}_6\text{D}_6$ .

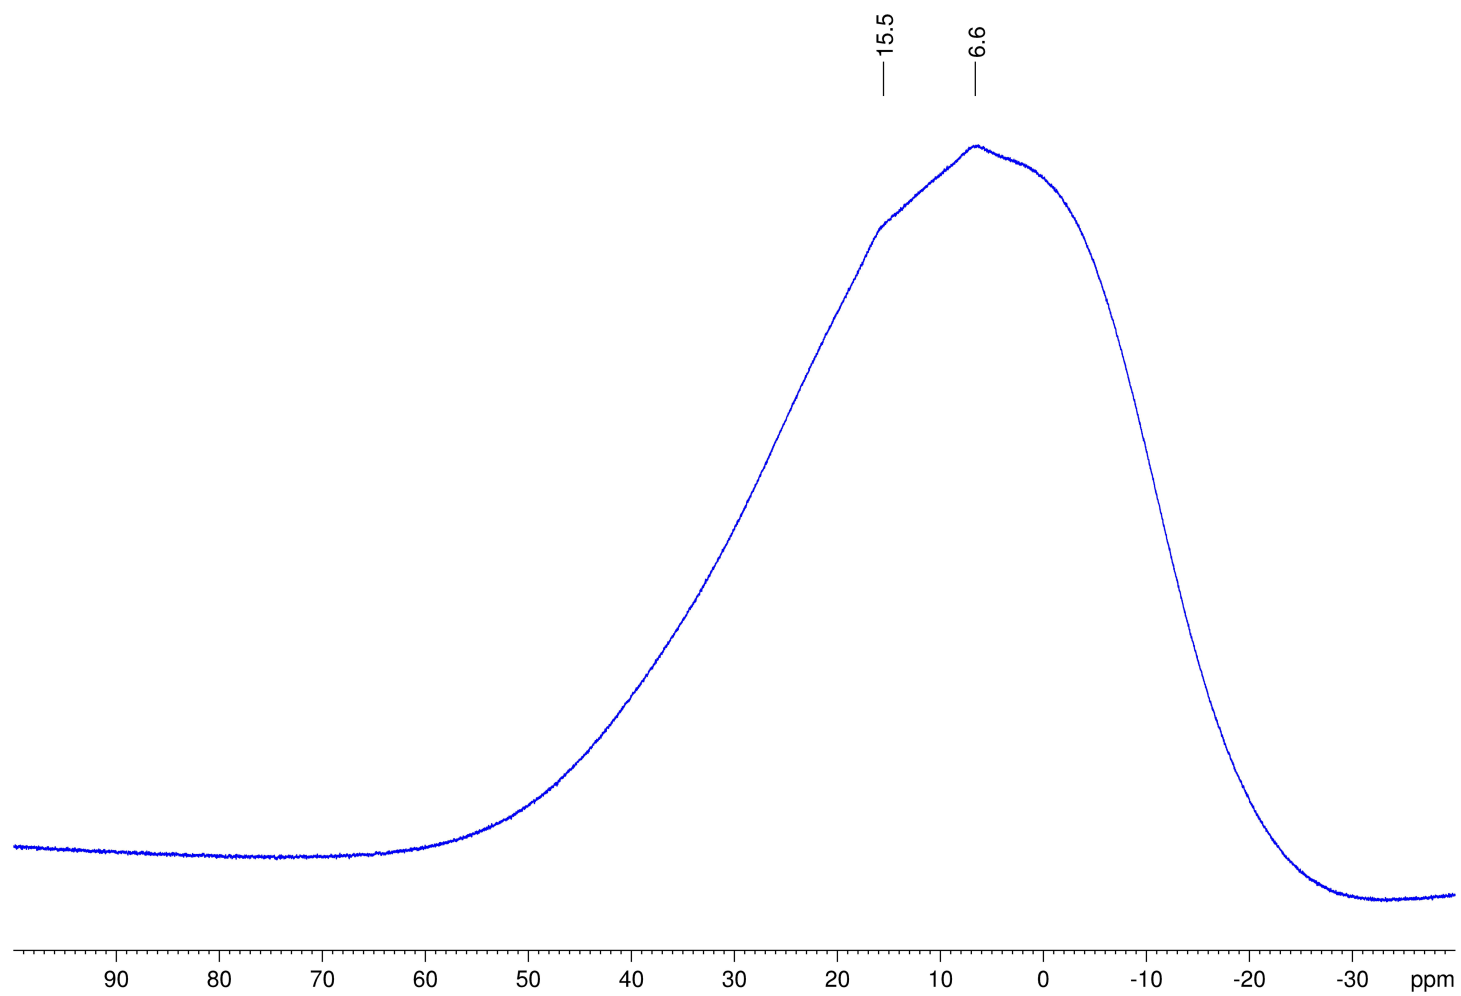

**Fig. S23**  $^{11}\text{B}$   $\{^1\text{H}\}$  NMR spectrum of **2-AuBr** in  $\text{C}_6\text{D}_6$ .



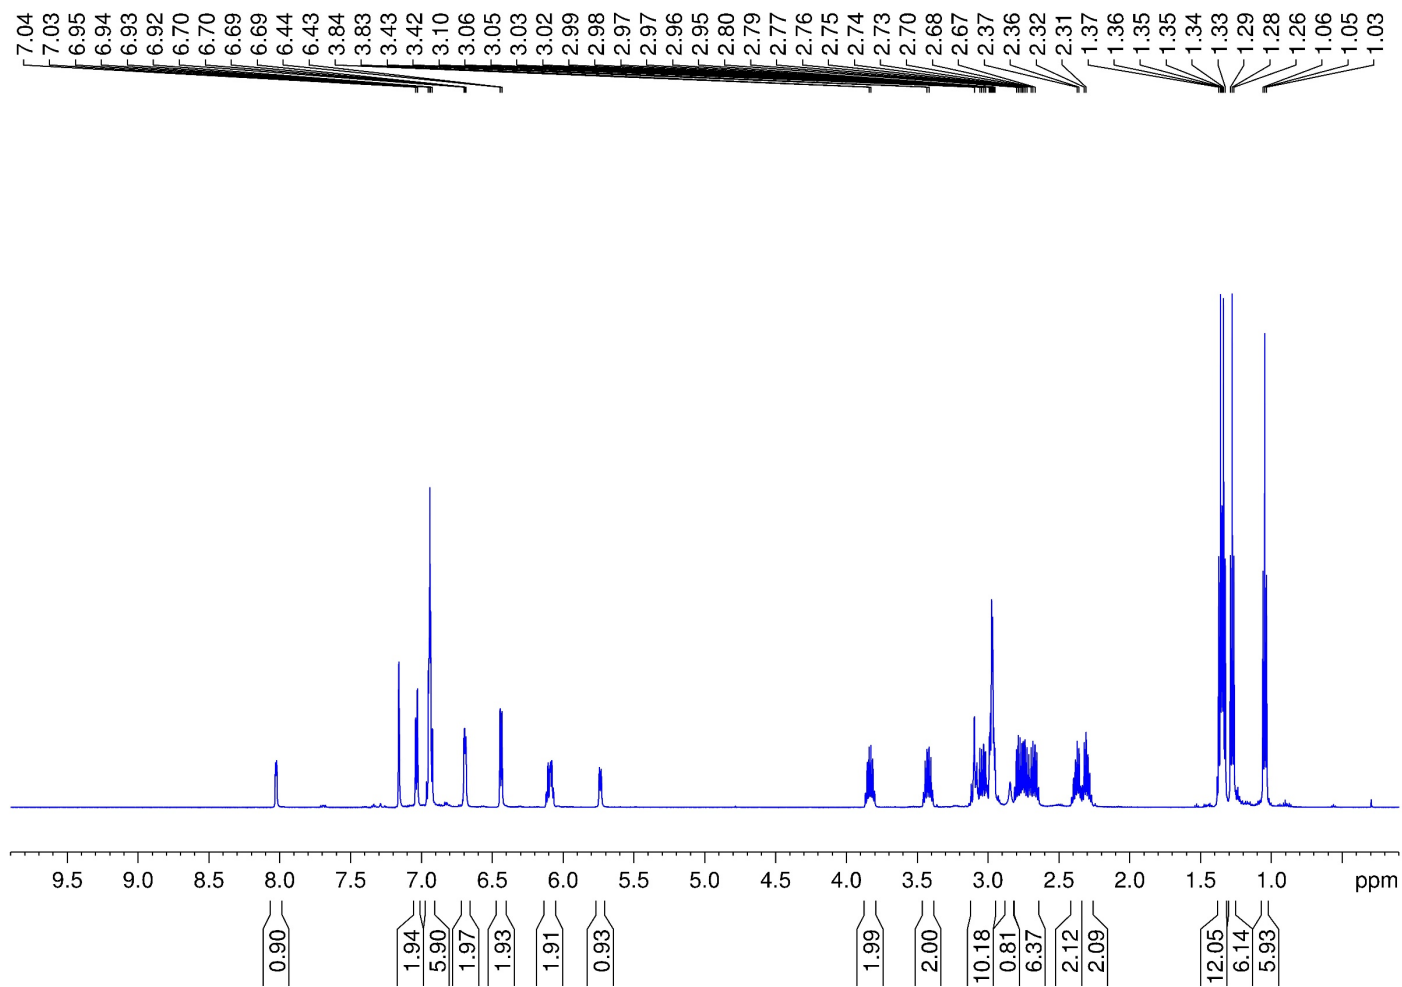

Fig. S24  $^1\text{H}\{^{11}\text{B}\}$  NMR spectrum of **3-CuAu** in  $\text{C}_6\text{D}_6$ .

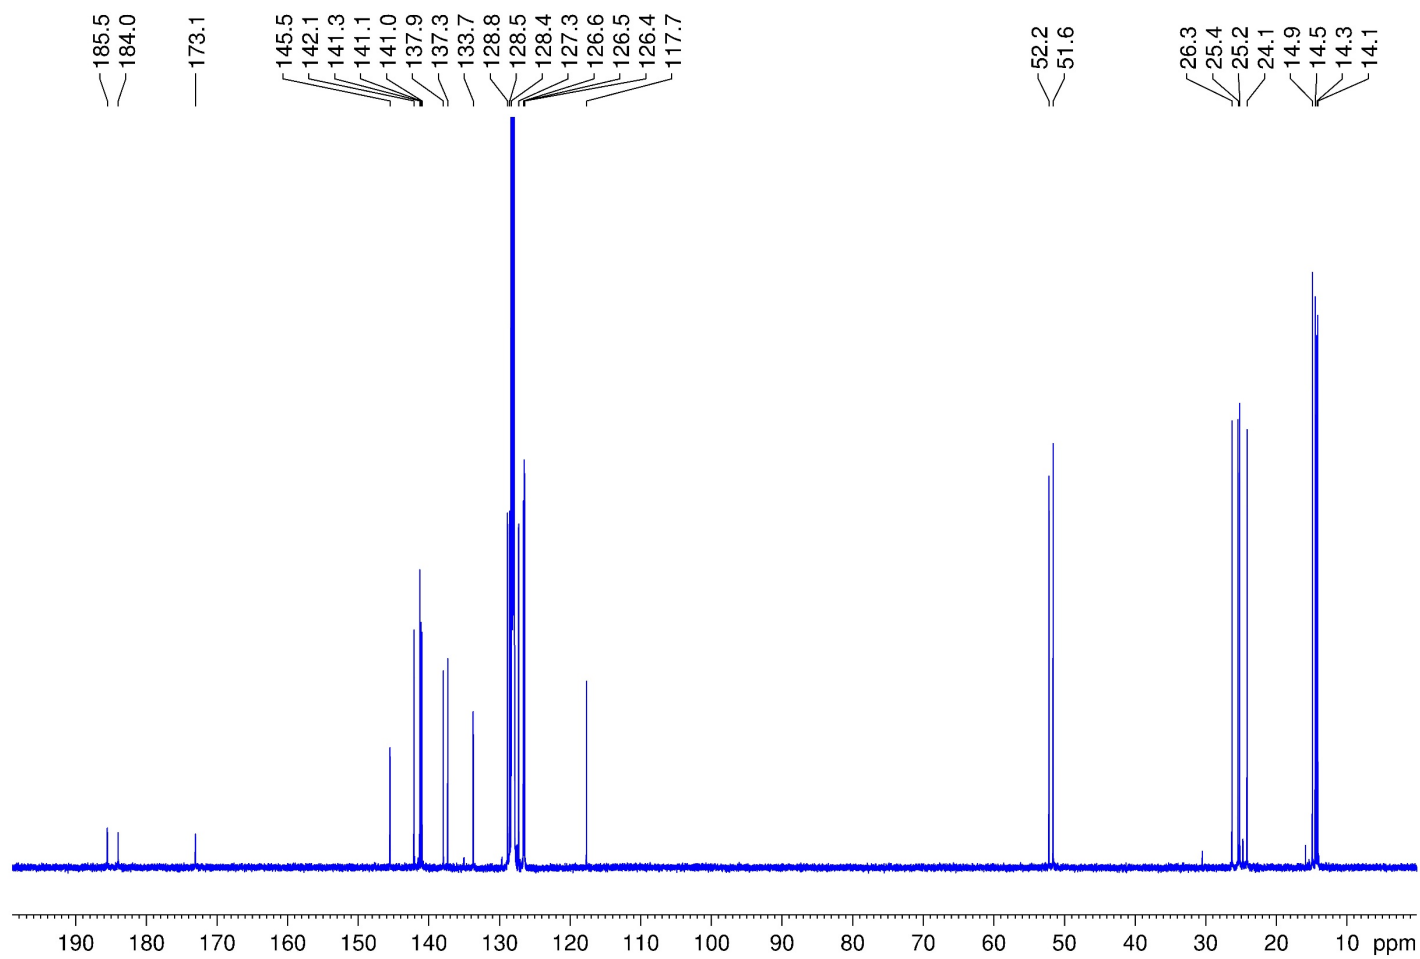

**Fig. S25**  $^{13}\text{C}\{^1\text{H}, ^{11}\text{B}\}$  NMR spectrum of **3-CuAu** in  $\text{C}_6\text{D}_6$ .

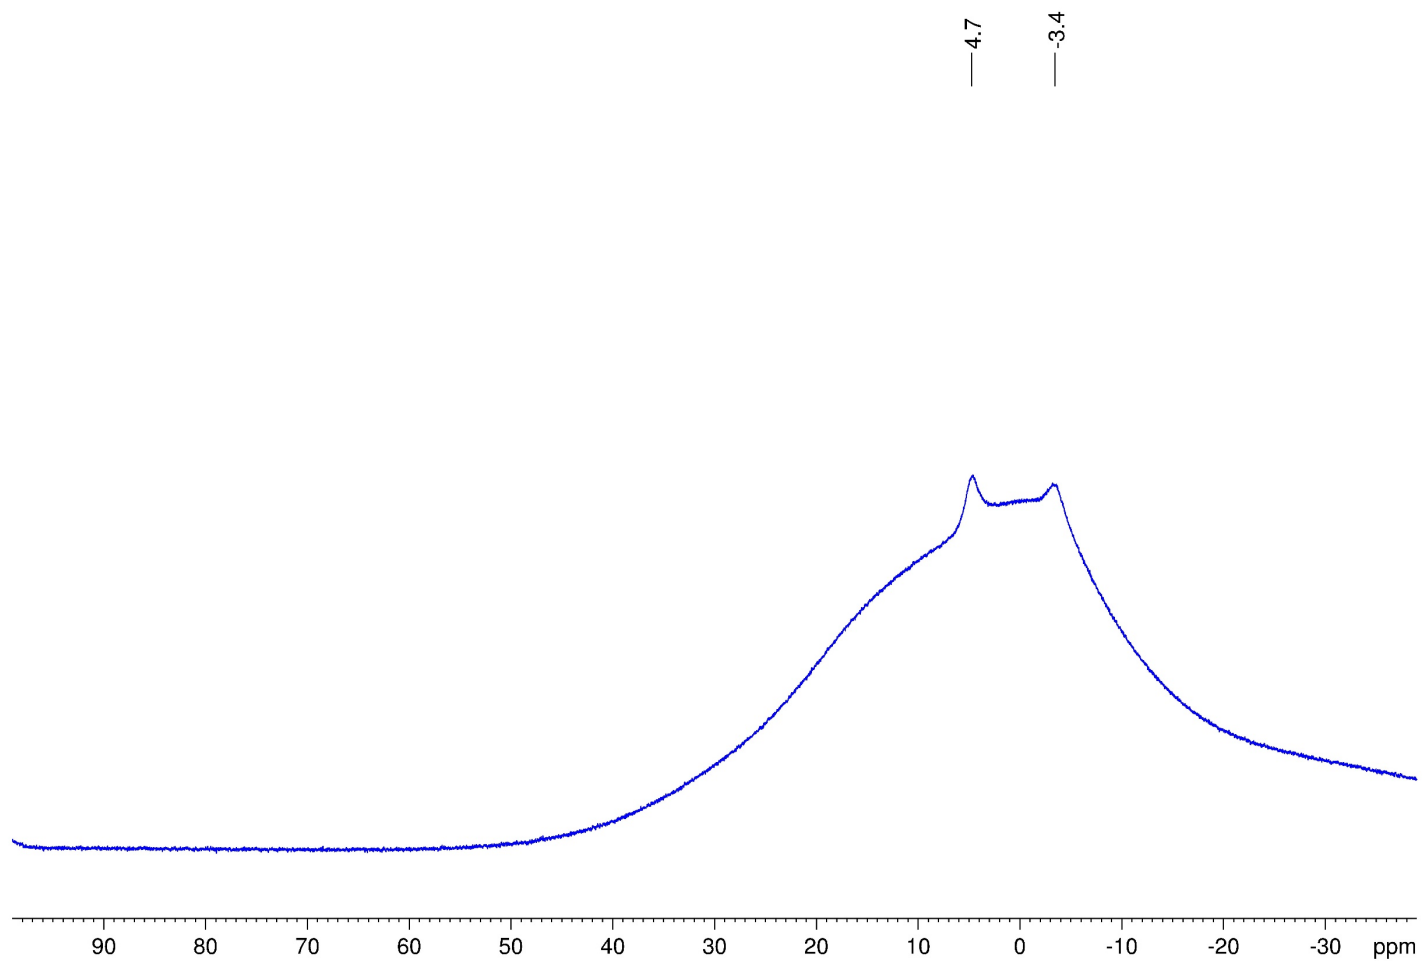

**Fig. S26**  $^{11}\text{B}\{^1\text{H}\}$  NMR spectrum of 3-CuAu in  $\text{C}_6\text{D}_6$ .

## UV-vis spectra

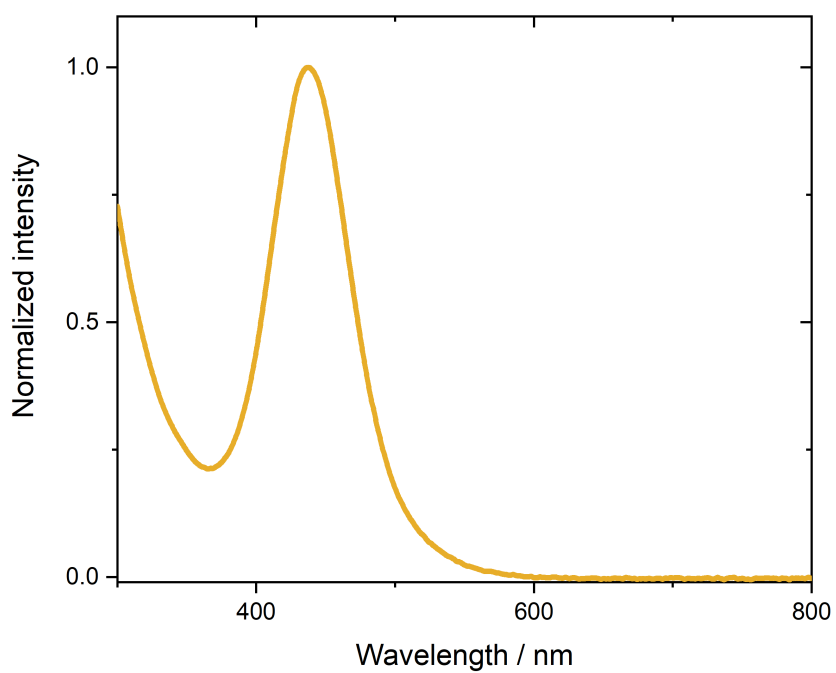

**Fig. S27** UV-vis spectrum of **2-CuCl** in C<sub>6</sub>H<sub>6</sub>.

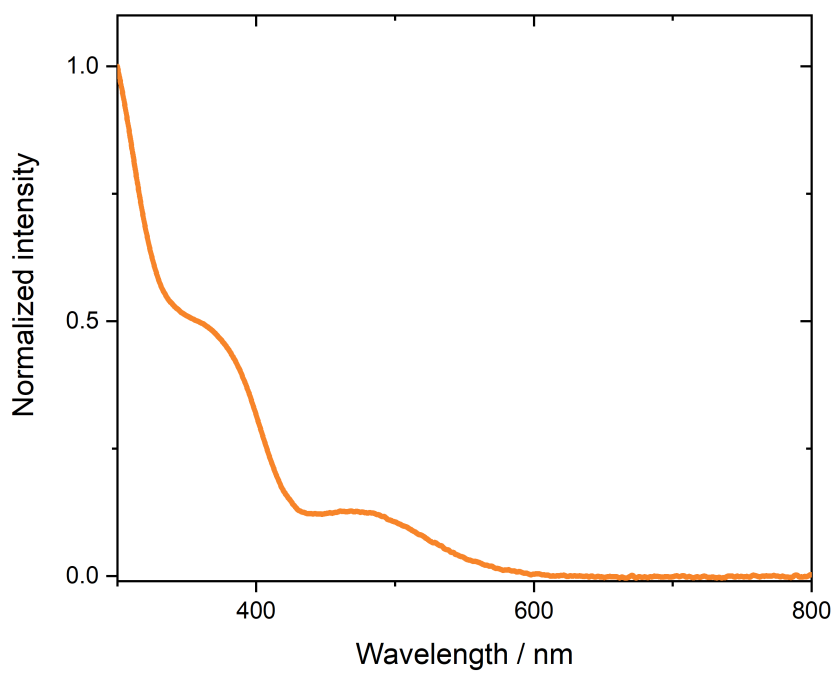

**Fig. S28** UV-vis spectrum of **3-CuCl** in C<sub>6</sub>H<sub>6</sub>.

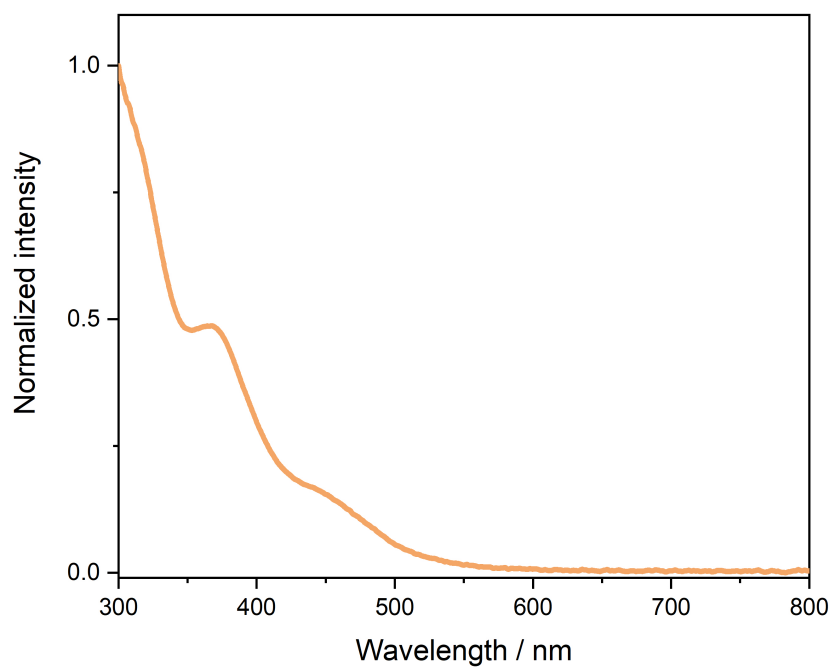

**Fig. S29** UV-vis spectrum of **4-Cu** in C<sub>6</sub>H<sub>6</sub>.

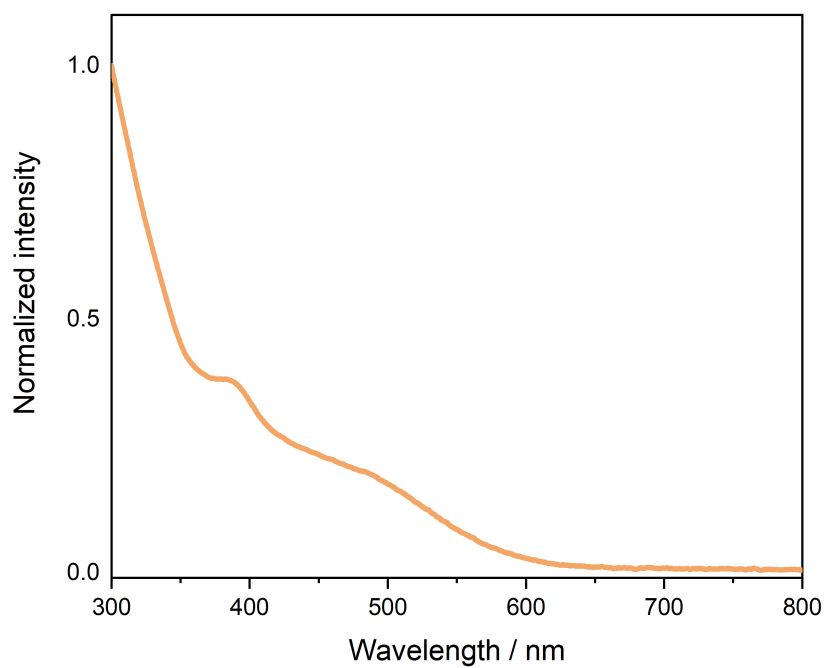

**Fig. S30** UV-vis spectrum of **3-CuC<sub>6</sub>F<sub>5</sub>** in C<sub>6</sub>H<sub>6</sub>.

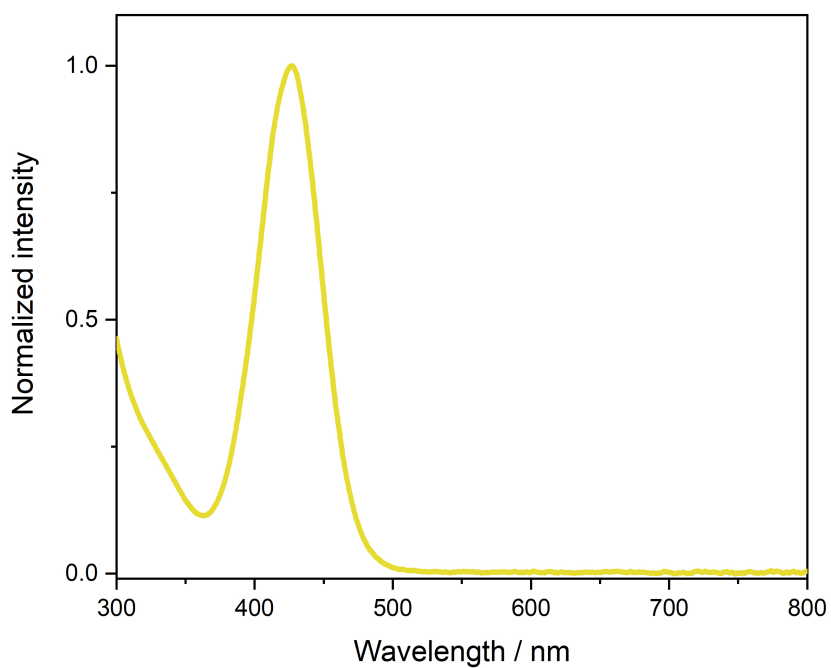

**Fig. S31** UV-vis spectrum of **2-AgCl** in C<sub>6</sub>H<sub>6</sub>.

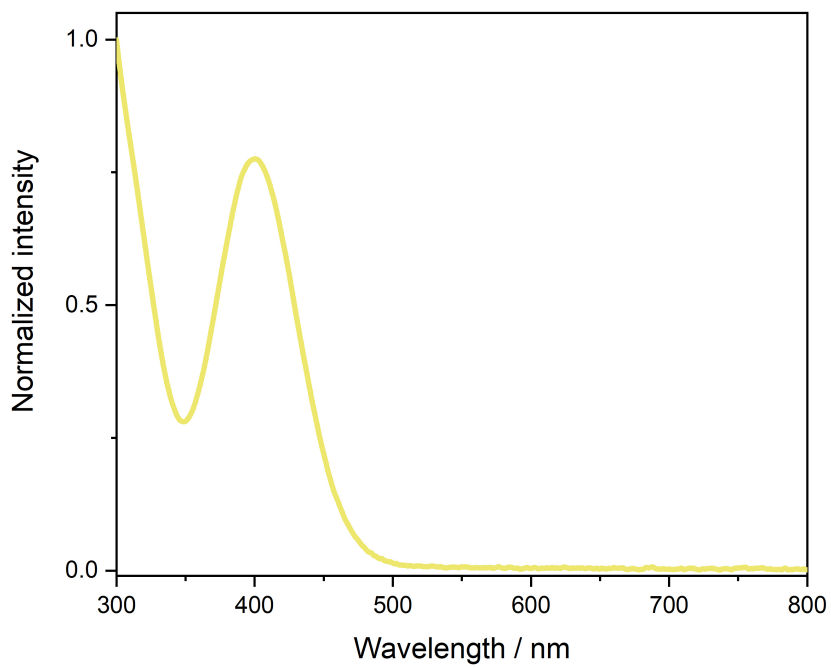

**Fig. S32** UV-vis spectrum of **2-AuCl** in C<sub>6</sub>H<sub>6</sub>.

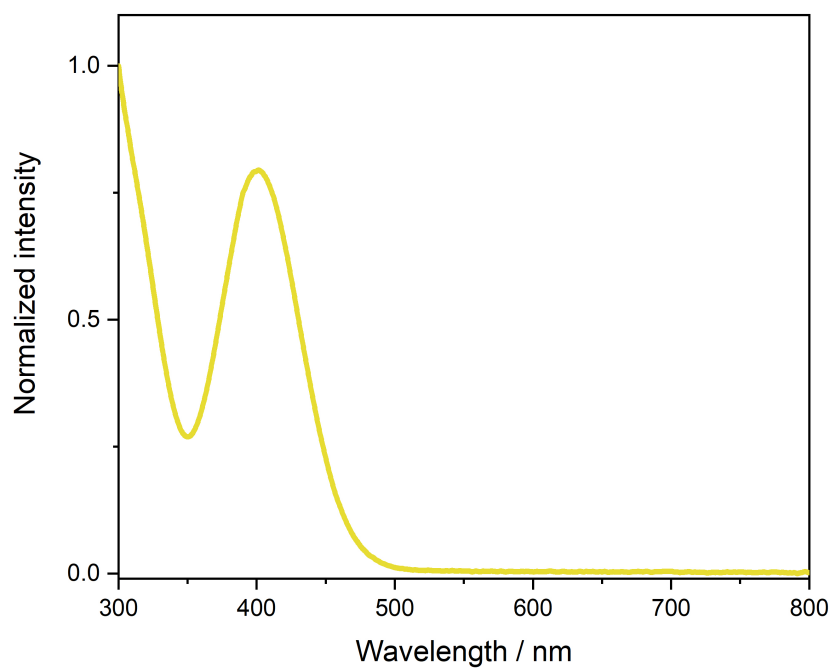

**Fig. S33** UV-vis spectrum of **2-AuBr** in C<sub>6</sub>H<sub>6</sub>.

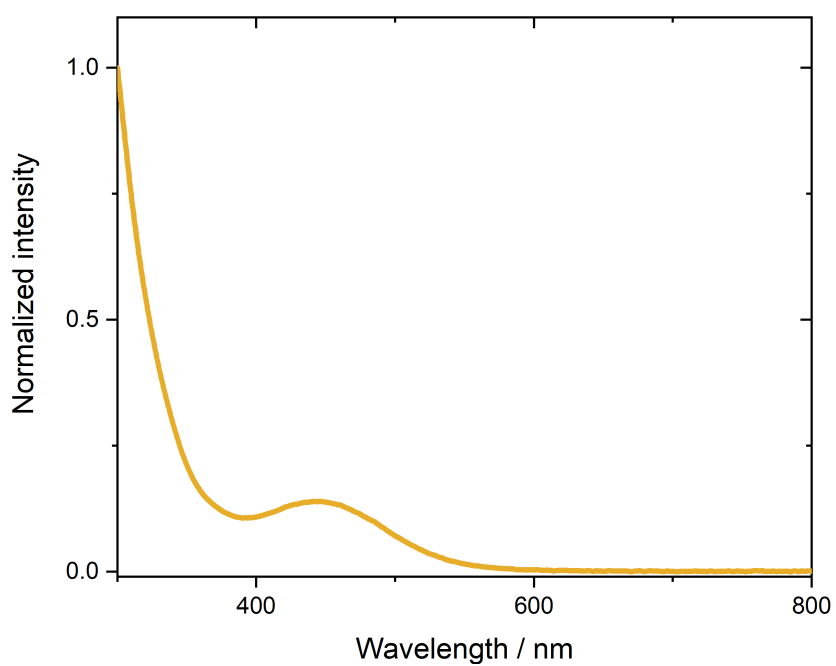

**Fig. S34** UV-vis spectrum of **3-CuAu** in C<sub>6</sub>H<sub>6</sub>.

## X-ray crystallographic data

The crystal data of **4-Cu**, **2-AuCl**, **2-AuBr** and **3-CuAu** were collected on a Bruker D8 Quest diffractometer with a CMOS area detector and multi-layer mirror monochromated  $\text{Mo}_{\text{K}\alpha}$  radiation. The crystal data of **3-CuC<sub>6</sub>F<sub>5</sub>** were collected on a Bruker X8-APEX II diffractometer with a CCD area detector and multi-layer mirror monochromated  $\text{Mo}_{\text{K}\alpha}$  radiation. The crystal data of **2-AuCl**, **2-CuCl** and **3-CuCl** was collected on a *XtaLAB Synergy Dualflex HyPix* diffractometer with a Hybrid Pixel array detector and multi-layer mirror monochromated  $\text{Cu}_{\text{K}\alpha}$  radiation. The structures were solved using the intrinsic phasing method,<sup>6</sup> refined with the ShelXL program<sup>7</sup> and expanded using Fourier techniques. All non-hydrogen atoms were refined anisotropically. Hydrogen atoms were included in structure factor calculations. Crystallographic data have been deposited with the Cambridge Crystallographic Data Center (CCDC numbers: 2290304 (**2-CuCl**), 2290303 (**3-CuCl**), 2290301 (**3-CuC<sub>6</sub>F<sub>5</sub>**), 2290307 (**4-Cu**), 2290309 (**2-AgCl**), 2290306 (**2-AuCl**), 2290302 (**2-AuBr**), 2290308 (**3-CuAu**)). These data can be obtained free of charge from The Cambridge Crystallographic Data Centre via [www.ccdc.cam.ac.uk/data\\_request/cif](http://www.ccdc.cam.ac.uk/data_request/cif)

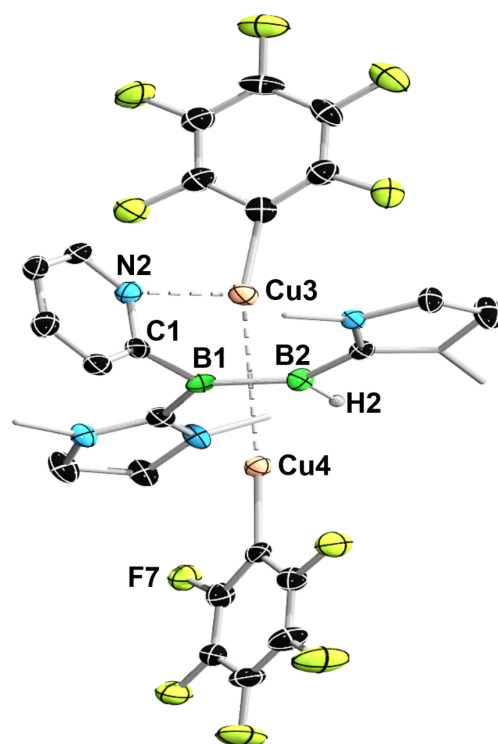

**Fig. S35** Crystallographically-derived structure of **3-CuC<sub>6</sub>F<sub>5</sub>**. Ellipsoids are shown at the 50% probability level. Aryl groups of the NHC units and all hydrogen atoms except that bound to the boron are omitted for clarity.

**Special refinement details for 2-CuCl:** All hydrogen atoms except H2\_1 were assigned to idealized positions. The coordinates of H2\_1 were refined freely. **Crystal data for 2-CuCl:**  $\text{C}_{51}\text{H}_{65}\text{B}_2\text{ClCuN}_5$ ,  $M_r = 868.69$ , red block,  $0.250 \times 0.130 \times 0.090 \text{ mm}^3$ , monoclinic space group  $P2_1/c$ ,  $a = 13.70400(10) \text{ \AA}$ ,



$b = 13.75780(10) \text{ \AA}$ ,  $c = 24.4253(2) \text{ \AA}$ ,  $\alpha = 90^\circ$ ,  $\beta = 101.3180(10)^\circ$ ,  $\gamma = 90^\circ$ ,  $V = 4515.51(6) \text{ \AA}^3$ ,  $Z = 4$ ,  $\rho_{\text{calcd}} = 1.278 \text{ g}\cdot\text{cm}^{-3}$ ,  $\mu = 1.531 \text{ mm}^{-1}$ ,  $F(000) = 1848$ ,  $T = 100(2) \text{ K}$ ,  $R_I = 0.0383$ ,  $wR_2 = 0.0910$ , 9291 independent reflections [ $2\theta \leq 150.656^\circ$ ] and 553 parameters.

**Special refinement details for 3-CuCl:** All hydrogen atoms except H2\_1 were assigned to idealized positions. The coordinates of H2\_1 were refined freely. The displacement parameters of atoms of the residues PYR were restrained to the same value with similarity restraint SIMU. The 1–2 and 1–3 distances in PYR residues were restrained to the same values with SAME. **Crystal data for 3-CuCl:**  $\text{C}_{51}\text{H}_{63}\text{B}_2\text{Cl}_2\text{Cu}_2\text{N}_5$ ,  $M_r = 965.66$ , red block,  $0.310 \times 0.130 \times 0.070 \text{ mm}^3$ , monoclinic space group  $P2_1/c$ ,  $a = 18.1438(2) \text{ \AA}$ ,  $b = 11.81800(10) \text{ \AA}$ ,  $c = 23.6127(2) \text{ \AA}$ ,  $\alpha = 90^\circ$ ,  $\beta = 112.1500(10)^\circ$ ,  $\gamma = 90^\circ$ ,  $V = 4689.46(8) \text{ \AA}^3$ ,  $Z = 4$ ,  $\rho_{\text{calcd}} = 1.368 \text{ g}\cdot\text{cm}^{-3}$ ,  $\mu = 2.473 \text{ mm}^{-1}$ ,  $F(000) = 2024$ ,  $T = 100(2) \text{ K}$ ,  $R_I = 0.0581$ ,  $wR_2 = 0.1333$ , 8530 independent reflections [ $2\theta \leq 136.48^\circ$ ] and 625 parameters.

**Special refinement details for 4-Cu:** All hydrogen atoms except H1 and H2 were assigned to idealized positions. The coordinates of H1 and H2 were refined freely. The unit cell contains 2.2381 benzene molecules, which were treated as a diffuse contribution to the overall scattering without specific atom positions by SQUEEZE/PLATON.<sup>8</sup> The displacement parameters of atoms of the disordered  $[\text{CuCl}_2]$  moieties were restrained to the same value with similarity restraint SIMU and RIGU. The distances between atoms of the disordered  $[\text{CuCl}_2]$  moieties were restrained during refinement to the same value with the SADI restraint. **Crystal data for 4-Cu:**  $\text{C}_{63}\text{H}_{64}\text{B}_2\text{Cl}_4\text{Cu}_4\text{N}_5[+2.2381(\text{C}_6\text{H}_6)]$ ,  $M_r = 1408.2$ , orange block,  $0.156 \times 0.089 \times 0.078 \text{ mm}^3$ , triclinic space group  $P\bar{1}$ ,  $a = 15.0923(11) \text{ \AA}$ ,  $b = 17.1901(14) \text{ \AA}$ ,  $c = 25.434(2) \text{ \AA}$ ,  $\alpha = 102.384(3)^\circ$ ,  $\beta = 91.280(2)^\circ$ ,  $\gamma = 90.589(3)^\circ$ ,  $V = 6442.7(9) \text{ \AA}^3$ ,  $Z = 4$ ,  $\rho_{\text{calcd}} = 1.452 \text{ g}\cdot\text{cm}^{-3}$ ,  $\mu = 1.515 \text{ mm}^{-1}$ ,  $F(000) = 2920$ ,  $T = 293(2) \text{ K}$ ,  $R_I = 0.1387$ ,  $wR_2 = 0.2759$ , 25361 independent reflections [ $2\theta \leq 52.044^\circ$ ] and 1293 parameters.

**Special refinement details for 3-CuC<sub>6</sub>F<sub>5</sub>:** All hydrogen atoms except H2\_1 were assigned to idealized positions. The coordinates of H2\_1 were refined freely. One diethylphenyl moiety showed disorder. The atomic displacement parameters (ADPs) of overlapping atoms from different PARTs (C1, C2, C3, C4, C5, C6, C7, C8, C9, C10 of RESIs 11/111) were restrained using similarity restraint SIMU and rigid body restraint RIGU. The N5\_7-C1\_11 and The N5\_7-C1\_111 distances between the imidazole and the diethylphenyl moieties were restrained using same distance restraint SADI. **Crystal data for 3-CuC<sub>6</sub>F<sub>5</sub>:**  $\text{C}_{63}\text{H}_{65}\text{B}_2\text{Cu}_2\text{F}_{10}\text{N}_5$ ,  $M_r = 1230.90$ , red plate,  $0.418 \times 0.248 \times 0.15 \text{ mm}^3$ , triclinic space group  $P\bar{1}$ ,  $a = 11.432(4) \text{ \AA}$ ,  $b = 14.578(7) \text{ \AA}$ ,  $c = 17.780(5) \text{ \AA}$ ,  $\alpha = 93.226(16)^\circ$ ,  $\beta = 107.118(10)^\circ$ ,  $\gamma = 94.524(14)^\circ$ ,  $V = 2813.3(18) \text{ \AA}^3$ ,  $Z = 2$ ,  $\rho_{\text{calcd}} = 1.453 \text{ g}\cdot\text{cm}^{-3}$ ,  $\mu = 0.835 \text{ mm}^{-1}$ ,  $F(000) = 1272$ ,  $T = 100(2) \text{ K}$ ,  $R_I = 0.1118$ ,  $wR^2 = 0.1480$ , 11078 independent reflections [ $2\theta \leq 52.042^\circ$ ] and 819 parameters.

**Special refinement details for 2-AgCl:** All hydrogen atoms except H1\_1 were assigned to idealized positions. The coordinates of H1\_1 were refined freely. The displacement parameters of atoms C1\_8 and C1\_18 were constrained to the same value with EADP keyword. The coordinates of atoms C1\_8 and C1\_18 were constrained to the same value. The displacement parameters of atoms C1\_10 to C6\_10, C1\_8 to N6\_18, C1\_7 to C10\_17, C1\_6 to C10\_16, C1\_5 to C10\_15 and C1\_4 to C10\_14 were restrained to the same value with similarity restraint SIMU. The 1–2 and 1–3 distances in the pyridyl group were restrained to the same values with SAME. Reflections [-4 0 4] and [0 0 6] were omitted. **Crystal data for 2-AgCl:** C<sub>60</sub>H<sub>74</sub>AgB<sub>2</sub>ClN<sub>5</sub>,  $M_r = 1030.18$ , yellow block, 0.094×0.076×0.060 mm<sup>3</sup>, monoclinic space group *I2/a*,  $a = 23.88640(10)$  Å,  $b = 12.68250(10)$  Å,  $c = 36.1057(2)$  Å,  $\alpha = 90^\circ$ ,  $\beta = 95.5220(10)^\circ$ ,  $\gamma = 90^\circ$ ,  $V = 10887.08(12)$  Å<sup>3</sup>,  $Z = 8$ ,  $\rho_{calcd} = 1.257$  g·cm<sup>-3</sup>,  $\mu = 3.735$  mm<sup>-1</sup>,  $F(000) = 4344$ ,  $T = 99.99(11)$  K,  $R_I = 0.0396$ ,  $wR_2 = 0.0988$ , 11200 independent reflections [ $2\theta \leq 150.992^\circ$ ] and 1066 parameters.

**Special refinement details for 2-AuCl:** All hydrogen atoms except H1\_1 were assigned to idealized positions. The coordinates of H1\_1 were refined freely. The displacement parameters of atoms C1\_7 to C7\_7 and C1\_17 to C7\_17 were restrained to the same value with similarity restraint SIMU. The displacement parameters of atoms C1\_8 to C2\_18 were restrained to the same value with similarity restraint SIMU. The distances between atoms C1\_8, C2\_8, C1\_18, C2\_18, C6\_4 were restrained during refinement to the same value with the SADI restraint. The U<sub>ii</sub> displacement parameters of atoms C2\_8 and C2\_18 were restrained with ISOR keyword to approximate isotropic behavior. The displacement parameters of atoms C1\_5 and C1\_15 were constrained to the same value with keyword EADP. The coordinates of atoms C1\_5 and C1\_15 were constrained to the same position. The displacement parameters of atoms C1\_5 to C6\_15 were restrained to the same value with similarity restraint SIMU. The atomic displacement parameters of atoms C1\_5 to C6\_15 were restrained with RIGU keyword in ShelXL input. The 1-2 and 1-3 distances of residues 8 and 18 were restrained to the same values with SAME. The following reflections were omitted as they were covered by the beamstop: [1 0 0], [0 1 1], [0 2 1], [1 1 1], [-1 1 1]. **Crystal data for 2-AuCl:** C<sub>123</sub>H<sub>154</sub>Au<sub>2</sub>B<sub>4</sub>Cl<sub>2</sub>N<sub>10</sub>,  $M_r = 2280.63$ , yellow block, 0.245×0.204×0.174 mm<sup>3</sup>, monoclinic space group *P2<sub>1</sub>/c*,  $a = 13.643(3)$  Å,  $b = 21.105(5)$  Å,  $c = 19.074(5)$  Å,  $\beta = 91.484(7)^\circ$ ,  $V = 5490(2)$  Å<sup>3</sup>,  $Z = 2$ ,  $\rho_{calcd} = 1.380$  g·cm<sup>-3</sup>,  $\mu = 2.772$  mm<sup>-1</sup>,  $F(000) = 2348$ ,  $T = 100(2)$  K,  $R_I = 0.0424$ ,  $wR^2 = 0.0788$ , 15405 independent reflections [ $2\theta \leq 59.24^\circ$ ] and 689 parameters.

**Special refinement details for 2-AuBr:** All hydrogen atoms except H1\_1 were assigned to idealized positions. The coordinates of H1\_1 were refined freely. The displacement parameters of atoms C1\_2 and C1\_12 were constrained to the same value with the keyword EADP. The coordinates of atoms C1\_2 and C1\_12 were constrained to the same value. The displacement parameters of atoms C1\_2 to C6\_12, C1\_9 to C2\_19, C1\_10 to C2\_110, BR4\_11 to BR4\_111 and C1\_13 to C7\_13 were restrained to the

same value with similarity restraint SIMU. The  $U_{ii}$  displacement parameters of atoms BR4\_11 and BR4\_111 were restrained with keyword ISOR to approximate isotropic behavior. The distances between atoms C1\_9 and C38\_1, C1\_19 and C38\_1, C1\_9 and C2\_9, C1\_19 and C2\_19 were restrained during refinement to the same value. The 1–2 and 1–3 distances in the pyridyl group were restrained to the same values with SAME. **Crystal data for 2-AuBr:**  $C_{109}H_{138}Au_2B_4Br_2N_{10}$ ,  $M_r = 2185.28$ , yellow block,  $0.362 \times 0.359 \times 0.228 \text{ mm}^3$ , monoclinic space group  $P2_1/n$ ,  $a = 12.547(6) \text{ \AA}$ ,  $b = 18.489(8) \text{ \AA}$ ,  $c = 21.362(8) \text{ \AA}$ ,  $\alpha = 90^\circ$ ,  $\beta = 93.295(13)^\circ$ ,  $\gamma = 90^\circ$ ,  $V = 4947(4) \text{ \AA}^3$ ,  $Z = 2$ ,  $\rho_{\text{calcd}} = 1.467 \text{ g}\cdot\text{cm}^{-3}$ ,  $\mu = \text{mm}^{-1}$ ,  $F(000) = 2220$ ,  $T = 100(2) \text{ K}$ ,  $R_I = 0.0516$ ,  $wR_2 = 0.0753$ , 9121 independent reflections [ $2\theta \leq 50.902^\circ$ ] and 662 parameters.

**Special refinement details for 3-CuAu:** Refined as a two-component inversion twin. The BASF parameter was refined to 24.9%. The displacement parameters of atoms of the residues ET and disordered DEP and BENZ residues were restrained to the same value with similarity restraint SIMU. The 1–2 and 1–3 distances in disordered DEP residue were restrained to the same values with SAME. The 1–2 distances in disordered ET residues were restrained to the same values with SADI. The atom distances in disordered benzene fragments were fitted with the AFIX 66 keyword. **Crystal data for 3-CuAu:**  $C_{120}H_{148}Au_2B_4Cl_4Cu_2N_{10}$ ,  $M_r = 2436.53$ , red block,  $0.290 \times 0.242 \times 0.121 \text{ mm}^3$ , monoclinic space group  $Cc$ ,  $a = 35.642(9) \text{ \AA}$ ,  $b = 11.768(3) \text{ \AA}$ ,  $c = 26.907(7) \text{ \AA}$ ,  $\alpha = 90^\circ$ ,  $\beta = 101.525(12)^\circ$ ,  $\gamma = 90^\circ$ ,  $V = 11058(5) \text{ \AA}^3$ ,  $Z = 4$ ,  $\rho_{\text{calcd}} = 1.463 \text{ g}\cdot\text{cm}^{-3}$ ,  $\mu = 3.175 \text{ mm}^{-1}$ ,  $F(000) = 4968$ ,  $T = 100(2) \text{ K}$ ,  $R_I = 0.0326$ ,  $wR_2 = 0.0744$ , Flack parameter = 0.249(6), 19946 independent reflections [ $2\theta \leq 50.698^\circ$ ] and 1411 parameters.

## Computational details

All calculations were carried out using the Gaussian 16, Revision C.01,<sup>9</sup> the ADF 2019.304,<sup>10,11</sup> and the ORCA 5.0.3<sup>12</sup> quantum chemistry program packages. Geometry optimizations for **2-AuCl**, **3-AuCl**, **3-AuCu**, **3-CuAu**, and **3-CuCl** were performed at the  $\omega$ B97X-D<sup>13</sup>/Def2-SVP<sup>14</sup> level of theory. The optimized geometries were determined as minima on their respective potential energy surfaces through vibrational frequency calculations, which confirmed the presence of only positive eigenvalues in the Hessian matrices.

To analyze the bonding situations in the various systems Mayer Bond Orders (MBOs)<sup>15</sup> were obtained at the  $\omega$ B97X-D/Def2-TZVP<sup>14</sup> level of theory. For these calculations, the Multiwfn 3.8<sup>16</sup> tool was used. A further evaluation of the bonding situation took place through the calculations based on the intrinsic bond orbital (IBO)<sup>17</sup> method at the  $\omega$ B97X-D/Def2-TZVP level of theory. For the calculations and graphical representations of the IBO method, the IBOView software, version v20211019-RevA,<sup>17,18</sup> was used. Further bonding investigations of **2-AuCl** were performed by the energy decomposition analysis with the natural orbitals for chemical valence (EDA-NOCV)<sup>19-21</sup> method at the PBE0-D3<sup>22,23</sup>/TZ2P<sup>24</sup> level of theory. The main results are displayed in Table S1. To take the relativistic effect into account the EDA-NOCV calculations of **2-AuCl** were performed with the zeroth-order regular approximation (ZORA).<sup>25,26</sup>

**Table S1.** Orbital interactions of the EDA-NOCV analysis of **2-AuCl** calculated at the PBE0-D3/TZ2P level of theory. The chosen fragments are (SIDep)HB=B(2-C<sub>5</sub>H<sub>4</sub>N)(SIDep) and AuCl (electron-sharing (B=B)-Au bond) and (SIDep)HB=B(2-C<sub>5</sub>H<sub>4</sub>N)(SIDep)<sup>-</sup> and AuCl<sup>+</sup> (dative (B=B)<sup>-</sup>-Au<sup>+</sup> bond). Energy terms are given in kcal mol<sup>-1</sup>. For  $\Delta V_{\text{elstat}}$ ,  $\Delta E_{\text{disp}}$ , and  $\Delta E_{\text{orb}}$ , the percentage weighting of the total attractive interaction is given. For  $\Delta E_{\text{orb-n}}$  the given percentage weighting is with respect to the total orbital interaction  $\Delta E_{\text{oi}}$ .

|                              | <b>2-AuCl</b>                  |                                                 |
|------------------------------|--------------------------------|-------------------------------------------------|
|                              | Electron-sharing (B=B)-Au bond | Dative (B=B) <sup>-</sup> -Au <sup>+</sup> bond |
| $\Delta E_{\text{int}}$      | -102.74                        | -379.42                                         |
| $\Delta E_{\text{Pauli}}$    | 209.79                         | 206.99                                          |
| $\Delta V_{\text{elstat}}$   | -211.47 (67.7%)                | -290.46 (49.5%)                                 |
| $\Delta E_{\text{disp}}$     | -14.71 (4.7%)                  | -14.71 (2.5%)                                   |
| $\Delta E_{\text{orb}}$      | -86.34 (27.6%)                 | -281.23 (48.0%)                                 |
| $\Delta E_{\text{orb-1}}$    | -45.51 (52.7%)                 | -163.80 (58.2%)                                 |
| $\Delta E_{\text{orb-2}}$    | -17.16 (19.9%)                 | -62.82 (22.3%)                                  |
| $\Delta E_{\text{orb-3}}$    | -5.71 (6.6%)                   | -14.21 (5.1%)                                   |
| $\Delta E_{\text{orb-rest}}$ | -17.96 (20.8%)                 | -40.40 (14.4%)                                  |

**Table S2.** Mayer bond orders (MBOs) for **2-AuCl**, **3-AuCl**, **3-AuCu**, **3-CuAu**, and **3-CuCl** at the  $\omega$ B97X-D/Def2-TZVP level of theory.

|       | <b>2-AuCl</b> | <b>3-AuCl</b> | <b>3-AuCu</b> | <b>3-CuAu</b> | <b>3-CuCl</b> |
|-------|---------------|---------------|---------------|---------------|---------------|
| B1-Au | 0.46          | 0.30 / 0.12   | 0.25          | 0.33          | -             |
| B2-Au | 0.20          | 0.14 / 0.51   | 0.23          | 0.32          | -             |
| B1-Cu | -             | -             | 0.37          | 0.32          | 0.29 / 0.40   |
| B2-Cu | -             | -             | 0.34          | 0.30          | 0.41 / 0.31   |

## Cartesian Coordinates

### Complex 2-AuCl, $\omega$ B97X-D/Def2-SVP

#### Geometry of the ground state

Energy = -2899.74855620 E<sub>h</sub>

|    |              |              |              |
|----|--------------|--------------|--------------|
| B  | -0.926569000 | 0.252041000  | 0.128785000  |
| Au | 0.646101000  | 1.138122000  | -1.244705000 |
| Cl | 1.429283000  | 2.469775000  | -3.072112000 |
| B  | 0.490592000  | -0.563908000 | 0.206339000  |
| H  | -1.836428000 | -0.079123000 | -0.599321000 |
| C  | -1.552140000 | 1.186436000  | 1.243457000  |
| N  | -1.160370000 | 2.374717000  | 1.737110000  |
| C  | -2.176405000 | 2.976684000  | 2.601867000  |
| H  | -2.678294000 | 3.799020000  | 2.064826000  |
| H  | -1.726289000 | 3.395255000  | 3.511663000  |
| N  | -2.718296000 | 0.857248000  | 1.834609000  |
| C  | -3.107513000 | 1.803324000  | 2.876545000  |
| H  | -2.942001000 | 1.358626000  | 3.872438000  |
| H  | -4.173354000 | 2.059782000  | 2.791163000  |
| C  | -0.093261000 | 3.204253000  | 1.266170000  |
| C  | -0.269052000 | 3.919956000  | 0.068413000  |
| C  | 0.784268000  | 4.731954000  | -0.355665000 |
| H  | 0.714398000  | 5.259189000  | -1.305971000 |
| C  | 1.944287000  | 4.840280000  | 0.402366000  |
| H  | 2.764949000  | 5.464615000  | 0.043282000  |
| C  | 2.070262000  | 4.164464000  | 1.611595000  |
| H  | 2.983435000  | 4.280712000  | 2.196212000  |
| C  | 1.045913000  | 3.336989000  | 2.074816000  |
| C  | -1.554315000 | 3.782440000  | -0.724960000 |
| H  | -2.395590000 | 4.138880000  | -0.103550000 |
| H  | -1.745217000 | 2.709539000  | -0.889860000 |
| C  | -1.581528000 | 4.484511000  | -2.074841000 |
| H  | -2.539658000 | 4.290481000  | -2.579289000 |
| H  | -1.472755000 | 5.575562000  | -1.974950000 |
| H  | -0.772970000 | 4.106307000  | -2.718946000 |
| C  | 1.125207000  | 2.606202000  | 3.398275000  |

|   |              |              |              |
|---|--------------|--------------|--------------|
| H | 1.122311000  | 1.523379000  | 3.202591000  |
| H | 0.198231000  | 2.794818000  | 3.964043000  |
| C | 2.305437000  | 2.967892000  | 4.288999000  |
| H | 2.264731000  | 2.388608000  | 5.222879000  |
| H | 3.266070000  | 2.737194000  | 3.807511000  |
| H | 2.303939000  | 4.037718000  | 4.550917000  |
| C | -3.569596000 | -0.258414000 | 1.576189000  |
| C | -4.589936000 | -0.094332000 | 0.617724000  |
| C | -5.560222000 | -1.089651000 | 0.522767000  |
| H | -6.369976000 | -0.991638000 | -0.201050000 |
| C | -5.504099000 | -2.221619000 | 1.334823000  |
| H | -6.275947000 | -2.989772000 | 1.247370000  |
| C | -4.456698000 | -2.390411000 | 2.229156000  |
| H | -4.400410000 | -3.294659000 | 2.841522000  |
| C | -3.469643000 | -1.406969000 | 2.369969000  |
| C | -4.578145000 | 1.126996000  | -0.273927000 |
| H | -3.595641000 | 1.152500000  | -0.773189000 |
| H | -4.608642000 | 2.034334000  | 0.354279000  |
| C | -5.671727000 | 1.197950000  | -1.328828000 |
| H | -5.550653000 | 2.105902000  | -1.936760000 |
| H | -5.620373000 | 0.334716000  | -2.009531000 |
| H | -6.678547000 | 1.225649000  | -0.883894000 |
| C | -2.358483000 | -1.590268000 | 3.374750000  |
| H | -1.580784000 | -0.832575000 | 3.208322000  |
| H | -1.878095000 | -2.563396000 | 3.178747000  |
| C | -2.829593000 | -1.545839000 | 4.829372000  |
| H | -1.983031000 | -1.680351000 | 5.518912000  |
| H | -3.309151000 | -0.583633000 | 5.066031000  |
| H | -3.565376000 | -2.336786000 | 5.039585000  |
| C | 0.821217000  | -1.684796000 | -0.898778000 |
| N | -0.030890000 | -2.203722000 | -1.811691000 |
| C | 0.652505000  | -2.972182000 | -2.851685000 |
| H | 0.623034000  | -2.428266000 | -3.809281000 |
| H | 0.152007000  | -3.940476000 | -2.996685000 |
| N | 2.042340000  | -2.207979000 | -1.146251000 |
| C | 2.068393000  | -3.098992000 | -2.301354000 |
| H | 2.323153000  | -4.125242000 | -1.987030000 |

|   |              |              |              |
|---|--------------|--------------|--------------|
| H | 2.835798000  | -2.766768000 | -3.015793000 |
| C | -1.457284000 | -2.190908000 | -1.864331000 |
| C | -2.095172000 | -1.473667000 | -2.887737000 |
| C | -3.474157000 | -1.650034000 | -3.049364000 |
| H | -3.990485000 | -1.107753000 | -3.845095000 |
| C | -4.189448000 | -2.503164000 | -2.219970000 |
| H | -5.263091000 | -2.639579000 | -2.368209000 |
| C | -3.541174000 | -3.167949000 | -1.182733000 |
| H | -4.109552000 | -3.811421000 | -0.508706000 |
| C | -2.171647000 | -3.016615000 | -0.976869000 |
| C | -1.348264000 | -0.494925000 | -3.765749000 |
| H | -1.287955000 | -0.892413000 | -4.794173000 |
| H | -0.315707000 | -0.392194000 | -3.405068000 |
| C | -1.971698000 | 0.901473000  | -3.791941000 |
| H | -1.291001000 | 1.605340000  | -4.290681000 |
| H | -2.943774000 | 0.918315000  | -4.308115000 |
| H | -2.118173000 | 1.267287000  | -2.764624000 |
| C | -1.501851000 | -3.715511000 | 0.183540000  |
| H | -0.845569000 | -2.995920000 | 0.699057000  |
| H | -2.285213000 | -3.981679000 | 0.909992000  |
| C | -0.716886000 | -4.973612000 | -0.187855000 |
| H | -0.308037000 | -5.458550000 | 0.711625000  |
| H | -1.357334000 | -5.702226000 | -0.707715000 |
| H | 0.132972000  | -4.742180000 | -0.845203000 |
| C | 3.270851000  | -2.019287000 | -0.440434000 |
| C | 3.547625000  | -2.876582000 | 0.642005000  |
| C | 4.774424000  | -2.735331000 | 1.288260000  |
| H | 5.016580000  | -3.366285000 | 2.144208000  |
| C | 5.702455000  | -1.790404000 | 0.852056000  |
| H | 6.659234000  | -1.693024000 | 1.370226000  |
| C | 5.411847000  | -0.968146000 | -0.226541000 |
| H | 6.137505000  | -0.218554000 | -0.551494000 |
| C | 4.185508000  | -1.061821000 | -0.894367000 |
| C | 2.521200000  | -3.906094000 | 1.062927000  |
| H | 2.412315000  | -4.648329000 | 0.252582000  |
| H | 1.541083000  | -3.410947000 | 1.132835000  |
| C | 2.799870000  | -4.633757000 | 2.369574000  |



|   |             |              |              |
|---|-------------|--------------|--------------|
| H | 1.974875000 | -5.322289000 | 2.604592000  |
| H | 3.723607000 | -5.230293000 | 2.323024000  |
| H | 2.895432000 | -3.923264000 | 3.204732000  |
| H | 2.847958000 | -0.295735000 | -2.390197000 |
| H | 5.869917000 | 0.018954000  | -2.925397000 |
| H | 4.839506000 | -1.226316000 | -3.658211000 |
| C | 3.872032000 | -0.127110000 | -2.034060000 |
| H | 3.860317000 | 0.900847000  | -1.638974000 |
| C | 4.834687000 | -0.216836000 | -3.216109000 |
| H | 4.531852000 | 0.498134000  | -3.994461000 |
| N | 2.605361000 | 0.330429000  | 1.343146000  |
| C | 3.467212000 | 0.385048000  | 2.350020000  |
| C | 2.184129000 | -1.115153000 | 3.684375000  |
| H | 2.005782000 | -1.678282000 | 4.604685000  |
| C | 1.283808000 | -1.182407000 | 2.624432000  |
| H | 0.391613000 | -1.806577000 | 2.699530000  |
| C | 1.516419000 | -0.460731000 | 1.439516000  |
| C | 3.315983000 | -0.319143000 | 3.545081000  |
| H | 4.060786000 | -0.234399000 | 4.338522000  |
| H | 4.341147000 | 1.030783000  | 2.201371000  |

### Complex 3-AuCl, $\omega$ B97X-D/Def2-SVP

#### Geometry of the ground state

Energy = -3494.48788129 E<sub>h</sub>

|    |              |              |              |
|----|--------------|--------------|--------------|
| B  | -0.800696000 | -0.254475000 | -0.050726000 |
| B  | 0.777256000  | 0.178163000  | 0.234087000  |
| Cu | -0.160308000 | -0.445492000 | 2.017783000  |
| Cl | 0.000403000  | -1.502858000 | 3.927587000  |
| Cu | 0.237376000  | 0.433800000  | -1.833368000 |
| Cl | 1.302756000  | 1.214737000  | -3.599658000 |
| C  | -1.130523000 | -1.839894000 | -0.059467000 |
| N  | -2.326671000 | -2.391221000 | 0.248472000  |
| C  | -2.288212000 | -3.851488000 | 0.282945000  |
| H  | -2.910181000 | -4.266847000 | -0.527359000 |
| H  | -2.688602000 | -4.217223000 | 1.239151000  |
| C  | -0.803418000 | -4.146202000 | 0.112134000  |
| H  | -0.341618000 | -4.479643000 | 1.053966000  |

|   |              |              |              |
|---|--------------|--------------|--------------|
| H | -0.586992000 | -4.895237000 | -0.661777000 |
| N | -0.257591000 | -2.844803000 | -0.275532000 |
| C | 1.534666000  | 1.563461000  | 0.281962000  |
| N | 2.882884000  | 1.614311000  | 0.284844000  |
| C | 3.377087000  | 2.968213000  | 0.041745000  |
| H | 3.684240000  | 3.070590000  | -1.010958000 |
| H | 4.240672000  | 3.188335000  | 0.683752000  |
| C | 2.151601000  | 3.813460000  | 0.352340000  |
| H | 2.174948000  | 4.255375000  | 1.364822000  |
| H | 1.995728000  | 4.623059000  | -0.371504000 |
| N | 1.070680000  | 2.830744000  | 0.274032000  |
| C | -2.021397000 | 0.683470000  | -0.519628000 |
| C | -3.050247000 | 1.273810000  | 0.222942000  |
| C | -3.991149000 | 2.129435000  | -1.815054000 |
| H | -4.756226000 | 2.682889000  | -2.362158000 |
| C | -2.914078000 | 1.564790000  | -2.486954000 |
| H | -2.793181000 | 1.673971000  | -3.569559000 |
| N | -1.970148000 | 0.864532000  | -1.857729000 |
| C | -3.616385000 | -1.775174000 | 0.318536000  |
| C | -4.187162000 | -1.501249000 | 1.567982000  |
| C | -5.484644000 | -0.973589000 | 1.588802000  |
| H | -5.952008000 | -0.748441000 | 2.550418000  |
| C | -6.183502000 | -0.744315000 | 0.412952000  |
| H | -7.194532000 | -0.332443000 | 0.450494000  |
| C | -5.607263000 | -1.052984000 | -0.818055000 |
| H | -6.173219000 | -0.874016000 | -1.732582000 |
| C | -4.322129000 | -1.585157000 | -0.890046000 |
| C | 1.040075000  | -2.817729000 | -0.880349000 |
| C | 1.142310000  | -2.587503000 | -2.264306000 |
| C | 2.410377000  | -2.647493000 | -2.845858000 |
| H | 2.510754000  | -2.433865000 | -3.912247000 |
| C | 3.531524000  | -2.965926000 | -2.087796000 |
| H | 4.515326000  | -3.013873000 | -2.560141000 |
| C | 3.402977000  | -3.199521000 | -0.724607000 |
| H | 4.287792000  | -3.415266000 | -0.122375000 |
| C | 2.162171000  | -3.111919000 | -0.091206000 |
| C | 4.617105000  | 0.135889000  | -0.606593000 |

|   |              |              |              |
|---|--------------|--------------|--------------|
| C | 3.825883000  | 0.553247000  | 0.474230000  |
| C | 5.661631000  | -0.759992000 | -0.350241000 |
| H | 6.288146000  | -1.088990000 | -1.183623000 |
| C | 5.889598000  | -1.254831000 | 0.925934000  |
| H | 6.705141000  | -1.959153000 | 1.105283000  |
| C | 5.058383000  | -0.868702000 | 1.974663000  |
| H | 5.216586000  | -1.275561000 | 2.976673000  |
| C | 4.022094000  | 0.044778000  | 1.774362000  |
| C | -0.251675000 | 3.310116000  | 0.506472000  |
| C | -0.775486000 | 3.258379000  | 1.815080000  |
| C | -1.989347000 | 3.907213000  | 2.066882000  |
| H | -2.396979000 | 3.905683000  | 3.079549000  |
| C | -2.653375000 | 4.586944000  | 1.053119000  |
| H | -3.592342000 | 5.101653000  | 1.268460000  |
| C | -2.127121000 | 4.610695000  | -0.233560000 |
| H | -2.664235000 | 5.129400000  | -1.031481000 |
| C | -0.919724000 | 3.974087000  | -0.534911000 |
| C | -3.460596000 | -1.749090000 | 2.868983000  |
| H | -2.459085000 | -2.162240000 | 2.686654000  |
| H | -4.017123000 | -2.513883000 | 3.437332000  |
| C | -3.303764000 | -0.497475000 | 3.730717000  |
| H | -2.735978000 | -0.734697000 | 4.639959000  |
| H | -4.274057000 | -0.060481000 | 4.012994000  |
| H | -2.723889000 | 0.266481000  | 3.191809000  |
| C | -3.676382000 | -1.944706000 | -2.209566000 |
| H | -3.427411000 | -3.019022000 | -2.203541000 |
| H | -2.712959000 | -1.420318000 | -2.274156000 |
| C | -4.479795000 | -1.628871000 | -3.462023000 |
| H | -3.905701000 | -1.910077000 | -4.356549000 |
| H | -4.699043000 | -0.552873000 | -3.534915000 |
| H | -5.434441000 | -2.176241000 | -3.493104000 |
| C | -0.055591000 | -2.320678000 | -3.145502000 |
| H | -0.749840000 | -1.621681000 | -2.655571000 |
| H | 0.292942000  | -1.789435000 | -4.042585000 |
| C | -0.810614000 | -3.586959000 | -3.548236000 |
| H | -1.648187000 | -3.345378000 | -4.219798000 |
| H | -1.227754000 | -4.106247000 | -2.671987000 |

|   |              |              |              |
|---|--------------|--------------|--------------|
| H | -0.147465000 | -4.293915000 | -4.069273000 |
| C | 2.082744000  | -3.272905000 | 1.407717000  |
| H | 1.102044000  | -2.954086000 | 1.784508000  |
| H | 2.794892000  | -2.561935000 | 1.855051000  |
| C | 2.402669000  | -4.682113000 | 1.905012000  |
| H | 2.314124000  | -4.728987000 | 3.000161000  |
| H | 3.425154000  | -4.985570000 | 1.632107000  |
| H | 1.717120000  | -5.430284000 | 1.476080000  |
| C | 4.365705000  | 0.596379000  | -2.019473000 |
| H | 4.274104000  | -0.301156000 | -2.650781000 |
| H | 3.383420000  | 1.078400000  | -2.107333000 |
| C | 5.459243000  | 1.499572000  | -2.589939000 |
| H | 5.196309000  | 1.811388000  | -3.611172000 |
| H | 6.433714000  | 0.987949000  | -2.629233000 |
| H | 5.596545000  | 2.408745000  | -1.983270000 |
| C | 3.169774000  | 0.468211000  | 2.945443000  |
| H | 2.110784000  | 0.485102000  | 2.652226000  |
| H | 3.224618000  | -0.308879000 | 3.721442000  |
| C | 3.567760000  | 1.815691000  | 3.546996000  |
| H | 2.929148000  | 2.060991000  | 4.408678000  |
| H | 3.467901000  | 2.632719000  | 2.816221000  |
| H | 4.613695000  | 1.805239000  | 3.889012000  |
| C | -0.039476000 | 2.561064000  | 2.886790000  |
| H | 1.036711000  | 2.449493000  | 2.735788000  |
| C | -0.570646000 | 2.039202000  | 3.996789000  |
| H | -1.643185000 | 2.076701000  | 4.204220000  |
| H | 0.049556000  | 1.505729000  | 4.719007000  |
| C | -0.369052000 | 4.028098000  | -1.939452000 |
| H | 0.469613000  | 3.328670000  | -2.056572000 |
| H | -1.144222000 | 3.648519000  | -2.623074000 |
| C | 0.044863000  | 5.430023000  | -2.388631000 |
| H | 0.444811000  | 5.397627000  | -3.412311000 |
| H | 0.823498000  | 5.856479000  | -1.736644000 |
| H | -0.804477000 | 6.130577000  | -2.377971000 |
| H | 1.608236000  | -0.685450000 | 0.380326000  |
| H | -3.070034000 | 1.156564000  | 1.305510000  |
| C | -4.046618000 | 1.986269000  | -0.427886000 |

|   |              |             |             |
|---|--------------|-------------|-------------|
| H | -4.864059000 | 2.432649000 | 0.142545000 |
|---|--------------|-------------|-------------|

### Complex 3-AuCu, $\omega$ B97X-D/Def2-SVP

#### Geometry of the ground state

Energy = -4999.04528793 E<sub>h</sub>

|    |              |              |              |
|----|--------------|--------------|--------------|
| B  | -0.815465000 | -0.279037000 | 0.006711000  |
| B  | 0.746027000  | 0.352573000  | 0.280238000  |
| Cu | -0.390673000 | 0.477685000  | 2.015997000  |
| Cl | -0.495396000 | 0.932093000  | 4.124435000  |
| Au | 0.615138000  | -0.556862000 | -1.709955000 |
| Cl | 1.442356000  | -1.156016000 | -3.837814000 |
| C  | -1.172540000 | -1.716059000 | 0.716168000  |
| N  | -2.389673000 | -2.060450000 | 1.196229000  |
| C  | -2.354789000 | -3.280034000 | 2.003950000  |
| H  | -3.152782000 | -3.965868000 | 1.685791000  |
| H  | -2.519920000 | -3.028437000 | 3.063660000  |
| C  | -0.957037000 | -3.815023000 | 1.738593000  |
| H  | -0.401410000 | -4.047126000 | 2.657479000  |
| H  | -0.950012000 | -4.712872000 | 1.100538000  |
| N  | -0.316838000 | -2.709581000 | 1.028932000  |
| C  | 1.455808000  | 1.750183000  | -0.025787000 |
| N  | 2.785962000  | 1.875604000  | 0.118929000  |
| C  | 3.291074000  | 3.138125000  | -0.418888000 |
| H  | 3.826802000  | 2.951217000  | -1.363865000 |
| H  | 3.992921000  | 3.603306000  | 0.286502000  |
| C  | 2.010354000  | 3.937206000  | -0.621587000 |
| H  | 1.856792000  | 4.712386000  | 0.148113000  |
| H  | 1.947562000  | 4.414031000  | -1.609177000 |
| N  | 0.973066000  | 2.910754000  | -0.489382000 |
| C  | -2.090906000 | 0.443947000  | -0.674622000 |
| C  | -2.963187000 | 1.294260000  | 0.021092000  |
| C  | -4.334364000 | 1.457843000  | -1.932377000 |
| H  | -5.213519000 | 1.823098000  | -2.466459000 |
| C  | -3.399682000 | 0.651834000  | -2.573170000 |
| H  | -3.526821000 | 0.384783000  | -3.628926000 |
| N  | -2.323025000 | 0.155593000  | -1.968262000 |
| C  | -3.691439000 | -1.541802000 | 0.902816000  |

|   |              |              |              |
|---|--------------|--------------|--------------|
| C | -4.389033000 | -0.830554000 | 1.889351000  |
| C | -5.704371000 | -0.451977000 | 1.603590000  |
| H | -6.273667000 | 0.112952000  | 2.343843000  |
| C | -6.293246000 | -0.778225000 | 0.388779000  |
| H | -7.319997000 | -0.468277000 | 0.181779000  |
| C | -5.585514000 | -1.502200000 | -0.567256000 |
| H | -6.065852000 | -1.753157000 | -1.513530000 |
| C | -4.275583000 | -1.914479000 | -0.323436000 |
| C | 1.041486000  | -2.922267000 | 0.631847000  |
| C | 1.303137000  | -3.490600000 | -0.626512000 |
| C | 2.639058000  | -3.699039000 | -0.981985000 |
| H | 2.863468000  | -4.086801000 | -1.978237000 |
| C | 3.667618000  | -3.396771000 | -0.098892000 |
| H | 4.707003000  | -3.552764000 | -0.396135000 |
| C | 3.376919000  | -2.894902000 | 1.165247000  |
| H | 4.187168000  | -2.657566000 | 1.856966000  |
| C | 2.061795000  | -2.644636000 | 1.554545000  |
| C | 4.533973000  | 0.222700000  | -0.288977000 |
| C | 3.745602000  | 0.941081000  | 0.622263000  |
| C | 5.618604000  | -0.502834000 | 0.217039000  |
| H | 6.249429000  | -1.065953000 | -0.475139000 |
| C | 5.889626000  | -0.530280000 | 1.578227000  |
| H | 6.743239000  | -1.098442000 | 1.954877000  |
| C | 5.050970000  | 0.137080000  | 2.468667000  |
| H | 5.240054000  | 0.080049000  | 3.543647000  |
| C | 3.964354000  | 0.885843000  | 2.012246000  |
| C | -0.370961000 | 3.344553000  | -0.694252000 |
| C | -1.020238000 | 3.991314000  | 0.374457000  |
| C | -2.229775000 | 4.642132000  | 0.114526000  |
| H | -2.761961000 | 5.125197000  | 0.936510000  |
| C | -2.763022000 | 4.651548000  | -1.169842000 |
| H | -3.710469000 | 5.160215000  | -1.360810000 |
| C | -2.116148000 | 3.984386000  | -2.203359000 |
| H | -2.560478000 | 3.968204000  | -3.201327000 |
| C | -0.903734000 | 3.320558000  | -1.990846000 |
| C | -3.742170000 | -0.475675000 | 3.208465000  |
| H | -2.649012000 | -0.532030000 | 3.110348000  |

|   |              |              |              |
|---|--------------|--------------|--------------|
| H | -4.013313000 | -1.243574000 | 3.955549000  |
| C | -4.095254000 | 0.902103000  | 3.761415000  |
| H | -3.458088000 | 1.123787000  | 4.627868000  |
| H | -5.147422000 | 0.973630000  | 4.075750000  |
| H | -3.909461000 | 1.687714000  | 3.013182000  |
| C | -3.481386000 | -2.735274000 | -1.315745000 |
| H | -3.122739000 | -3.648461000 | -0.807961000 |
| H | -2.579915000 | -2.164862000 | -1.591981000 |
| C | -4.204160000 | -3.121099000 | -2.596953000 |
| H | -3.538624000 | -3.716858000 | -3.237490000 |
| H | -4.498013000 | -2.229356000 | -3.170927000 |
| H | -5.109024000 | -3.717566000 | -2.402161000 |
| C | 0.217347000  | -3.909423000 | -1.590636000 |
| H | -0.731166000 | -3.417652000 | -1.338398000 |
| H | 0.488834000  | -3.538593000 | -2.591054000 |
| C | 0.016461000  | -5.425649000 | -1.643169000 |
| H | -0.775509000 | -5.687364000 | -2.360852000 |
| H | -0.265677000 | -5.838519000 | -0.661713000 |
| H | 0.938418000  | -5.937423000 | -1.957868000 |
| C | 1.786214000  | -2.081210000 | 2.928550000  |
| H | 0.747204000  | -1.732273000 | 3.008071000  |
| H | 2.402307000  | -1.178799000 | 3.058357000  |
| C | 2.087503000  | -3.058204000 | 4.065036000  |
| H | 1.865036000  | -2.595036000 | 5.037435000  |
| H | 3.145842000  | -3.360552000 | 4.065297000  |
| H | 1.487132000  | -3.977926000 | 3.981065000  |
| C | 4.225182000  | 0.183557000  | -1.765900000 |
| H | 3.977874000  | -0.856488000 | -2.033741000 |
| H | 3.301812000  | 0.738896000  | -1.976209000 |
| C | 5.345715000  | 0.692608000  | -2.670391000 |
| H | 5.038258000  | 0.620653000  | -3.723421000 |
| H | 6.269448000  | 0.106487000  | -2.550115000 |
| H | 5.595676000  | 1.744084000  | -2.455672000 |
| C | 3.044278000  | 1.562372000  | 3.002035000  |
| H | 2.002060000  | 1.283410000  | 2.785266000  |
| H | 3.245952000  | 1.135125000  | 3.995808000  |
| C | 3.143211000  | 3.084475000  | 3.099414000  |

|   |              |              |              |
|---|--------------|--------------|--------------|
| H | 2.518383000  | 3.441792000  | 3.930587000  |
| H | 2.777038000  | 3.583267000  | 2.191200000  |
| H | 4.178297000  | 3.413097000  | 3.279892000  |
| C | -0.434398000 | 3.975086000  | 1.731314000  |
| H | 0.069640000  | 3.053772000  | 2.041871000  |
| C | -0.505355000 | 4.977389000  | 2.611103000  |
| H | -0.981876000 | 5.931825000  | 2.367188000  |
| H | -0.088388000 | 4.862725000  | 3.613931000  |
| C | -0.197790000 | 2.643708000  | -3.139619000 |
| H | 0.652590000  | 2.058434000  | -2.766337000 |
| H | -0.883365000 | 1.899136000  | -3.573234000 |
| C | 0.281776000  | 3.606546000  | -4.225331000 |
| H | 0.785421000  | 3.051071000  | -5.029438000 |
| H | 0.994419000  | 4.345232000  | -3.825106000 |
| H | -0.553214000 | 4.167066000  | -4.672806000 |
| H | 1.559465000  | -0.303206000 | 0.890577000  |
| H | -2.749658000 | 1.544930000  | 1.062914000  |
| C | -4.100868000 | 1.788677000  | -0.599567000 |
| H | -4.794828000 | 2.429673000  | -0.051438000 |

### Complex 3-CuAu, $\omega$ B97X-D/Def2-SVP

#### Geometry of the ground state

Energy = -4999.03621526 E<sub>h</sub>

|    |              |              |              |
|----|--------------|--------------|--------------|
| B  | 0.778221000  | -0.272664000 | 0.209205000  |
| B  | -0.845864000 | 0.161600000  | -0.009365000 |
| Au | 0.171759000  | -0.223257000 | -1.958038000 |
| Cl | 0.091081000  | -0.676876000 | -4.284897000 |
| Cu | -0.239670000 | 0.263416000  | 2.057862000  |
| Cl | -1.349091000 | 0.746360000  | 3.900928000  |
| C  | 1.174872000  | -1.856133000 | 0.182050000  |
| N  | 2.393753000  | -2.341029000 | -0.135911000 |
| C  | 2.407544000  | -3.795568000 | -0.279766000 |
| H  | 3.065297000  | -4.246290000 | 0.481169000  |
| H  | 2.798127000  | -4.071151000 | -1.269981000 |
| C  | 0.938539000  | -4.163388000 | -0.098962000 |
| H  | 0.475425000  | -4.499622000 | -1.039293000 |
| H  | 0.767350000  | -4.939606000 | 0.659498000  |



|   |              |              |              |
|---|--------------|--------------|--------------|
| N | 0.338754000  | -2.898859000 | 0.326044000  |
| C | -1.617342000 | 1.558105000  | 0.010406000  |
| N | -2.964885000 | 1.579151000  | 0.010626000  |
| C | -3.493268000 | 2.907238000  | 0.317651000  |
| H | -3.816038000 | 2.944605000  | 1.370231000  |
| H | -4.355468000 | 3.140039000  | -0.321203000 |
| C | -2.284937000 | 3.794036000  | 0.064171000  |
| H | -2.314061000 | 4.300137000  | -0.917186000 |
| H | -2.141757000 | 4.557894000  | 0.838737000  |
| N | -1.182420000 | 2.830582000  | 0.084307000  |
| C | 1.977172000  | 0.671303000  | 0.720469000  |
| C | 2.955512000  | 1.354868000  | -0.010685000 |
| C | 3.945243000  | 2.074156000  | 2.056270000  |
| H | 4.713519000  | 2.607133000  | 2.618922000  |
| C | 2.910631000  | 1.426246000  | 2.717940000  |
| H | 2.827332000  | 1.448460000  | 3.809376000  |
| N | 1.964254000  | 0.746338000  | 2.068472000  |
| C | 3.659375000  | -1.673009000 | -0.156891000 |
| C | 4.228069000  | -1.295843000 | -1.381560000 |
| C | 5.501761000  | -0.715896000 | -1.351202000 |
| H | 5.969053000  | -0.401686000 | -2.286352000 |
| C | 6.180037000  | -0.539222000 | -0.153366000 |
| H | 7.172895000  | -0.083732000 | -0.152443000 |
| C | 5.607497000  | -0.950593000 | 1.048042000  |
| H | 6.157858000  | -0.809963000 | 1.978659000  |
| C | 4.342903000  | -1.535518000 | 1.069848000  |
| C | -0.978404000 | -2.934359000 | 0.881725000  |
| C | -1.126398000 | -2.806647000 | 2.273828000  |
| C | -2.413050000 | -2.915898000 | 2.805160000  |
| H | -2.552346000 | -2.780198000 | 3.879762000  |
| C | -3.504799000 | -3.177225000 | 1.984933000  |
| H | -4.504388000 | -3.261938000 | 2.417196000  |
| C | -3.330943000 | -3.300999000 | 0.611936000  |
| H | -4.196199000 | -3.462608000 | -0.034106000 |
| C | -2.069520000 | -3.164365000 | 0.031037000  |
| C | -4.656760000 | -0.007987000 | 0.784559000  |
| C | -3.886033000 | 0.517349000  | -0.262699000 |

|   |              |              |              |
|---|--------------|--------------|--------------|
| C | -5.679064000 | -0.907190000 | 0.460060000  |
| H | -6.291233000 | -1.321142000 | 1.265796000  |
| C | -5.903228000 | -1.299037000 | -0.852467000 |
| H | -6.700596000 | -2.008543000 | -1.085353000 |
| C | -5.094353000 | -0.800621000 | -1.871168000 |
| H | -5.253504000 | -1.122477000 | -2.903506000 |
| C | -4.082705000 | 0.122827000  | -1.601253000 |
| C | 0.133256000  | 3.374960000  | -0.022630000 |
| C | 0.687666000  | 3.569457000  | -1.304909000 |
| C | 1.882294000  | 4.293235000  | -1.400771000 |
| H | 2.315446000  | 4.483032000  | -2.384275000 |
| C | 2.496653000  | 4.806460000  | -0.266408000 |
| H | 3.422100000  | 5.378799000  | -0.361531000 |
| C | 1.935151000  | 4.597126000  | 0.988086000  |
| H | 2.428060000  | 4.994453000  | 1.878654000  |
| C | 0.742243000  | 3.885410000  | 1.136304000  |
| C | 3.515411000  | -1.509907000 | -2.697375000 |
| H | 2.460646000  | -1.755151000 | -2.510712000 |
| H | 3.950483000  | -2.398347000 | -3.188797000 |
| C | 3.575182000  | -0.326113000 | -3.660296000 |
| H | 2.934592000  | -0.522180000 | -4.529972000 |
| H | 4.597674000  | -0.122616000 | -4.012060000 |
| H | 3.185780000  | 0.586052000  | -3.182773000 |
| C | 3.695114000  | -2.005773000 | 2.353720000  |
| H | 3.461347000  | -3.080005000 | 2.264455000  |
| H | 2.723893000  | -1.499810000 | 2.450415000  |
| C | 4.487737000  | -1.774864000 | 3.631226000  |
| H | 3.917380000  | -2.138540000 | 4.497893000  |
| H | 4.684807000  | -0.704027000 | 3.791479000  |
| H | 5.453943000  | -2.302491000 | 3.621893000  |
| C | 0.040499000  | -2.581446000 | 3.207467000  |
| H | 0.738536000  | -1.844837000 | 2.781416000  |
| H | -0.344664000 | -2.105260000 | 4.119987000  |
| C | 0.806401000  | -3.855019000 | 3.563179000  |
| H | 1.607289000  | -3.637094000 | 4.285676000  |
| H | 1.276217000  | -4.310490000 | 2.678344000  |
| H | 0.139024000  | -4.607393000 | 4.010055000  |

|   |              |              |              |
|---|--------------|--------------|--------------|
| C | -1.936730000 | -3.198866000 | -1.473290000 |
| H | -0.930685000 | -2.877087000 | -1.775507000 |
| H | -2.611809000 | -2.430159000 | -1.882407000 |
| C | -2.267089000 | -4.552371000 | -2.100734000 |
| H | -2.154896000 | -4.507698000 | -3.193807000 |
| H | -3.300934000 | -4.857986000 | -1.878858000 |
| H | -1.605057000 | -5.347243000 | -1.721757000 |
| C | -4.404771000 | 0.345698000  | 2.227696000  |
| H | -4.284768000 | -0.594569000 | 2.787611000  |
| H | -3.433683000 | 0.843674000  | 2.345579000  |
| C | -5.514921000 | 1.174958000  | 2.873288000  |
| H | -5.253672000 | 1.409259000  | 3.915460000  |
| H | -6.477121000 | 0.639223000  | 2.874854000  |
| H | -5.676419000 | 2.126481000  | 2.342220000  |
| C | -3.257053000 | 0.678123000  | -2.735757000 |
| H | -2.200253000 | 0.727513000  | -2.439829000 |
| H | -3.278314000 | -0.035880000 | -3.571742000 |
| C | -3.710605000 | 2.050051000  | -3.233519000 |
| H | -3.090348000 | 2.373376000  | -4.082541000 |
| H | -3.623773000 | 2.817858000  | -2.449973000 |
| H | -4.760397000 | 2.030687000  | -3.563622000 |
| C | 0.007713000  | 3.054369000  | -2.508804000 |
| H | -1.050594000 | 2.803318000  | -2.398436000 |
| C | 0.579003000  | 2.832581000  | -3.695848000 |
| H | 1.644196000  | 3.002471000  | -3.873881000 |
| H | 0.007603000  | 2.402552000  | -4.519466000 |
| C | 0.134194000  | 3.720640000  | 2.507490000  |
| H | -0.698149000 | 3.006025000  | 2.484985000  |
| H | 0.882517000  | 3.250588000  | 3.163739000  |
| C | -0.328361000 | 5.033664000  | 3.139975000  |
| H | -0.770425000 | 4.840749000  | 4.128041000  |
| H | -1.088388000 | 5.539366000  | 2.523423000  |
| H | 0.504501000  | 5.741395000  | 3.272217000  |
| H | -1.698826000 | -0.685825000 | -0.076746000 |
| H | 2.930146000  | 1.318418000  | -1.099921000 |
| C | 3.954087000  | 2.044045000  | 0.660168000  |
| H | 4.736813000  | 2.560876000  | 0.100819000  |

### Complex 3-CuCl, $\omega$ B97X-D/Def2-SVP

#### Geometry of the ground state

Energy = -6503.59332055 E<sub>h</sub>

|    |              |              |              |
|----|--------------|--------------|--------------|
| B  | -0.798479000 | -0.335076000 | -0.033085000 |
| B  | 0.823489000  | 0.334943000  | 0.112243000  |
| Au | -0.461322000 | 1.069987000  | 1.743273000  |
| Cl | -0.734652000 | 2.265018000  | 3.751093000  |
| Au | 0.667956000  | -1.002493000 | -1.623054000 |
| Cl | 1.548074000  | -2.059845000 | -3.539716000 |
| C  | -1.183292000 | -1.630497000 | 0.918074000  |
| N  | -2.419046000 | -1.887917000 | 1.396508000  |
| C  | -2.420587000 | -2.923254000 | 2.430134000  |
| H  | -3.195002000 | -3.672960000 | 2.213732000  |
| H  | -2.647091000 | -2.469459000 | 3.407944000  |
| C  | -1.005703000 | -3.474685000 | 2.350762000  |
| H  | -0.493810000 | -3.497135000 | 3.322938000  |
| H  | -0.957894000 | -4.486028000 | 1.917622000  |
| N  | -0.339875000 | -2.530318000 | 1.455394000  |
| C  | 1.575090000  | 1.585627000  | -0.555321000 |
| N  | 2.907519000  | 1.707491000  | -0.434300000 |
| C  | 3.450754000  | 2.769552000  | -1.280868000 |
| H  | 3.983370000  | 2.326295000  | -2.137840000 |
| H  | 4.164258000  | 3.384534000  | -0.715891000 |
| C  | 2.194145000  | 3.521901000  | -1.700449000 |
| H  | 2.062877000  | 4.479373000  | -1.167981000 |
| H  | 2.147407000  | 3.720519000  | -2.779889000 |
| N  | 1.127267000  | 2.597739000  | -1.310918000 |
| C  | -2.042143000 | 0.171350000  | -0.946991000 |
| C  | -2.971973000 | 1.148876000  | -0.561769000 |
| C  | -4.198539000 | 0.757902000  | -2.580925000 |
| H  | -5.038530000 | 0.947877000  | -3.251662000 |
| C  | -3.213728000 | -0.163238000 | -2.920253000 |
| H  | -3.259031000 | -0.702611000 | -3.873645000 |
| N  | -2.182225000 | -0.452599000 | -2.131609000 |
| C  | -3.704782000 | -1.440437000 | 0.953140000  |
| C  | -4.426049000 | -0.523370000 | 1.730074000  |

|   |              |              |              |
|---|--------------|--------------|--------------|
| C | -5.723543000 | -0.207420000 | 1.315608000  |
| H | -6.309704000 | 0.513927000  | 1.887246000  |
| C | -6.274526000 | -0.794598000 | 0.183932000  |
| H | -7.288050000 | -0.530560000 | -0.126191000 |
| C | -5.546791000 | -1.722666000 | -0.556159000 |
| H | -5.998526000 | -2.177562000 | -1.438211000 |
| C | -4.252273000 | -2.077369000 | -0.177398000 |
| C | 1.032093000  | -2.810787000 | 1.158896000  |
| C | 1.333917000  | -3.644747000 | 0.068707000  |
| C | 2.680485000  | -3.918624000 | -0.188199000 |
| H | 2.937223000  | -4.519628000 | -1.063481000 |
| C | 3.679878000  | -3.417868000 | 0.636023000  |
| H | 4.728268000  | -3.629470000 | 0.414508000  |
| C | 3.349133000  | -2.645376000 | 1.744244000  |
| H | 4.137212000  | -2.251184000 | 2.388316000  |
| C | 2.022100000  | -2.325508000 | 2.026786000  |
| C | 4.632302000  | -0.015477000 | -0.343802000 |
| C | 3.834022000  | 0.924064000  | 0.324879000  |
| C | 5.688481000  | -0.597131000 | 0.367036000  |
| H | 6.329034000  | -1.325496000 | -0.136320000 |
| C | 5.916813000  | -0.280040000 | 1.699233000  |
| H | 6.747067000  | -0.742998000 | 2.237381000  |
| C | 5.063888000  | 0.601132000  | 2.361036000  |
| H | 5.217789000  | 0.818067000  | 3.421142000  |
| C | 4.009261000  | 1.222693000  | 1.689846000  |
| C | -0.205205000 | 2.975814000  | -1.656573000 |
| C | -0.878961000 | 3.883419000  | -0.814530000 |
| C | -2.101913000 | 4.399418000  | -1.257870000 |
| H | -2.663310000 | 5.079643000  | -0.615258000 |
| C | -2.612352000 | 4.046243000  | -2.499755000 |
| H | -3.568149000 | 4.458328000  | -2.830510000 |
| C | -1.927685000 | 3.149738000  | -3.312529000 |
| H | -2.348889000 | 2.860574000  | -4.278038000 |
| C | -0.709259000 | 2.597378000  | -2.910952000 |
| C | -3.823834000 | 0.104172000  | 2.966174000  |
| H | -2.727490000 | 0.053002000  | 2.895686000  |
| H | -4.094310000 | -0.510142000 | 3.844045000  |

|   |              |              |              |
|---|--------------|--------------|--------------|
| C | -4.226317000 | 1.551941000  | 3.226946000  |
| H | -3.617741000 | 1.964089000  | 4.042441000  |
| H | -5.288032000 | 1.649744000  | 3.499121000  |
| H | -4.039790000 | 2.177045000  | 2.340461000  |
| C | -3.435897000 | -3.106809000 | -0.927847000 |
| H | -3.117776000 | -3.889954000 | -0.216543000 |
| H | -2.511721000 | -2.621596000 | -1.280525000 |
| C | -4.113782000 | -3.758178000 | -2.123253000 |
| H | -3.433906000 | -4.485152000 | -2.589571000 |
| H | -4.370429000 | -3.011288000 | -2.889566000 |
| H | -5.035513000 | -4.290413000 | -1.841188000 |
| C | 0.279649000  | -4.274625000 | -0.812095000 |
| H | -0.680843000 | -3.756681000 | -0.691447000 |
| H | 0.573897000  | -4.116458000 | -1.861128000 |
| C | 0.097317000  | -5.771583000 | -0.551472000 |
| H | -0.672511000 | -6.190070000 | -1.217026000 |
| H | -0.205474000 | -5.976052000 | 0.487704000  |
| H | 1.032661000  | -6.322658000 | -0.731248000 |
| C | 1.698625000  | -1.473630000 | 3.230898000  |
| H | 0.645749000  | -1.161329000 | 3.201830000  |
| H | 2.279541000  | -0.541195000 | 3.159043000  |
| C | 2.001522000  | -2.158754000 | 4.563278000  |
| H | 1.747413000  | -1.497150000 | 5.404302000  |
| H | 3.067103000  | -2.420843000 | 4.648157000  |
| H | 1.427138000  | -3.091641000 | 4.678474000  |
| C | 4.356383000  | -0.437834000 | -1.766231000 |
| H | 4.090041000  | -1.507208000 | -1.754860000 |
| H | 3.450159000  | 0.055220000  | -2.140913000 |
| C | 5.507740000  | -0.206521000 | -2.742521000 |
| H | 5.219899000  | -0.547509000 | -3.747232000 |
| H | 6.414063000  | -0.757214000 | -2.448059000 |
| H | 5.779407000  | 0.859469000  | -2.805633000 |
| C | 3.079126000  | 2.151633000  | 2.434097000  |
| H | 2.037735000  | 1.876110000  | 2.209424000  |
| H | 3.198130000  | 1.964542000  | 3.511641000  |
| C | 3.267896000  | 3.645379000  | 2.173216000  |
| H | 2.589692000  | 4.223347000  | 2.817413000  |

|   |              |              |              |
|---|--------------|--------------|--------------|
| H | 3.033166000  | 3.915542000  | 1.133695000  |
| H | 4.300221000  | 3.965355000  | 2.381842000  |
| C | -0.294859000 | 4.276625000  | 0.482730000  |
| H | 0.519788000  | 3.650437000  | 0.853748000  |
| C | -0.679542000 | 5.299122000  | 1.251027000  |
| H | -1.477589000 | 5.989065000  | 0.964239000  |
| H | -0.208566000 | 5.461511000  | 2.222026000  |
| C | 0.034814000  | 1.663921000  | -3.833928000 |
| H | 0.909311000  | 1.243036000  | -3.321855000 |
| H | -0.611854000 | 0.798345000  | -4.046070000 |
| C | 0.479478000  | 2.313845000  | -5.143853000 |
| H | 1.016052000  | 1.582469000  | -5.765166000 |
| H | 1.152435000  | 3.167491000  | -4.964123000 |
| H | -0.375644000 | 2.688940000  | -5.726455000 |
| H | 1.652065000  | -0.221957000 | 0.789189000  |
| H | -2.841010000 | 1.671462000  | 0.387735000  |
| C | -4.065085000 | 1.429874000  | -1.368719000 |
| H | -4.802533000 | 2.172665000  | -1.056693000 |

## References

1. M. Arrowsmith, J. Böhnke, H. Braunschweig, M. A. Celik, T. Dellermann and K. Hammond, *Chem. Eur. J.*, 2016, **22**, 17169-17172.
2. T. Brückner, B. Ritschel, J. O. C. Jimenez-Halla, F. Fantuzzi, D. Duwe, C. Markl, R. D. Dewhurst, M. Dietz and H. Braunschweig, *Angew. Chem. Int. Ed.*, 2023, **62**, e202213284.
3. S. C. H. Heaney, *Organometallic Complexes of Copper*, Georg Thieme Verlag KG, Stuttgart, 1st. Edition edn., 2004.
4. M. Halim, R. D. Kennedy, M. Suzuki, S. I. Khan, P. L. Diaconescu and Y. Rubin, *J. Am. Chem. Soc.*, 2011, **133**, 6841-6851.
5. M.-Z. Wang, M.-K. Wong and C.-M. Che, *Chem. Eur. J.*, 2008, **14**, 8353-8364.
6. G. Sheldrick, *Acta Cryst. A*, 2015, **71**, 3-8.
7. G. Sheldrick, *Acta Cryst. A*, 2008, **64**, 112-122.
8. A. Spek, *Acta Cryst. C*, 2015, **71**, 9-18.
9. M. J. Frisch et al., *Gaussian 16 Rev. C.01*, Wallingford, CT, 2016.
10. G. te Velde, F. M. Bickelhaupt, E. J. Baerends, C. Fonseca Guerra, S. J. A. van Gisbergen, J. G. Snijders and T. Ziegler, *J. Comput. Chem.*, 2001, **22**, 931-967.
11. E. J. Baerends et al., *ADF 2019.304*, SCM, Theoretical Chemistry, Vrije Universiteit, Amsterdam, The Netherlands.
12. F. Neese, F. Wennmohs, U. Becker and C. Riplinger, *J. Chem. Phys.*, 2020, **152**, 224108.
13. J.-D. Chai and M. Head-Gordon, *Phys. Chem. Chem. Phys.*, 2008, **10**, 6615-6620.
14. F. Weigend and R. Ahlrichs, *Phys. Chem. Chem. Phys.*, 2005, **7**, 3297-3305.
15. I. Mayer, *J. Comput. Chem.*, 2007, **28**, 204-221.
16. T. Lu and F. Chen, *J. Comput. Chem.*, 2012, **33**, 580-592.
17. G. Knizia, *J. Chem. Theory Comput.*, 2013, **9**, 4834-4843.
18. G. Knizia and J. E. M. N. Klein, *Angew. Chem. Int. Ed.*, 2015, **54**, 5518-5522.
19. T. Ziegler and A. Rauk, *Inorg. Chem.*, 1979, **18**, 1558-1565.
20. T. Ziegler and A. Rauk, *Inorg. Chem.*, 1979, **18**, 1755-1759.
21. M. P. Mitoraj, A. Michalak and T. Ziegler, *J. Chem. Theory Comput.*, 2009, **5**, 962-975.
22. C. Adamo and V. Barone, *J. Chem. Phys.*, 1999, **110**, 6158-6170.
23. S. Grimme, J. Antony, S. Ehrlich and H. Krieg, *J. Chem. Phys.*, 2010, **132**, 154104.
24. E. Van Lenthe and E. J. Baerends, *J. Comput. Chem.*, 2003, **24**, 1142-1156.
25. E. v. Lenthe, E. J. Baerends and J. G. Snijders, *J. Chem. Phys.*, 1993, **99**, 4597-4610.
26. E. van Lenthe, E. J. Baerends and J. G. Snijders, *J. Chem. Phys.*, 1994, **101**, 9783-9792.
